# Supplementary material for: Synthesis of Randomly Substituted Anionic Cyclodextrins in Ball Milling
Source: PubMed Central journal article supplement (PMC6155213; doi:10.3390/molecules22030485), 2017-03-19
Supplement: molecules-22-00485-s001.pdf [file molecules-22-00485-s001.pdf]

# Supporting Information

## Synthesis of randomly substituted anionic cyclodextrins in a ball mill

László Jicsinszky<sup>1,\*</sup>, Marina Caporaso<sup>1</sup>, Emanuela Calcio Gaudino<sup>1</sup>, Cristina Giovannoli<sup>2</sup>, and Giancarlo Cravotto<sup>1,\*</sup>

<sup>1</sup> University of Turin, Department of Drug Science and Technology, Via P. Giuria 7, 10125 Turin, Italy; [laszlo.jicsinszky@unito.it](mailto:laszlo.jicsinszky@unito.it) (LJ); [marina.caporaso@unito.it](mailto:marina.caporaso@unito.it) (MC); [Giancarlo.cravotto@unito.it](mailto:Giancarlo.cravotto@unito.it) (GC).

<sup>2</sup> University of Turin, Department of Chemistry, Via P. Giuria 7 - 10125 Turin, Italy; [cristina.giovannoli@unito.it](mailto:cristina.giovannoli@unito.it) (CG)

\* Correspondence: [ljicsinszky@gmail.com](mailto:ljicsinszky@gmail.com) (LJ), [Giancarlo.cravotto@unito.it](mailto:Giancarlo.cravotto@unito.it) (GC). Tel.: +39-011-670-7663, +39-011-670-7684

## Content

|                                                                                                                                                                         |     |
|-------------------------------------------------------------------------------------------------------------------------------------------------------------------------|-----|
| Figure S 1: Proton NMR spectrum of carboxymethylated $\beta$ CD ( <b>2</b> ) prepared in solution (item 1 in Table 1), DS $\approx$ 4.3-4.5                             | S4  |
| Figure S 2: HSQC-DEPT spectrum of carboxymethylated $\beta$ CD ( <b>2</b> ) prepared in solution (item 1 in Table 1), DS $\approx$ 4.3-4.5                              | S4  |
| Figure S 3: <sup>13</sup> C-NMR spectrum of carboxymethylated $\beta$ CD ( <b>2</b> ) prepared in solution (item 1 in Table 1), DS $\approx$ 4.3-4.5                    | S5  |
| Figure S 4: ESI+ mass spectrum of carboxymethylated $\beta$ CD ( <b>2</b> ) prepared in solution (item 1 in Table 1), DS $\approx$ 4.3-4.5                              | S5  |
| Figure S 5: Peak identification in ESI+ mass spectrum of carboxymethylated $\beta$ CD ( <b>2</b> ) prepared in solution (item 1 in Table 1), DS $\approx$ 4.3-4.5 [1,2] | S6  |
| Figure S 6: Proton NMR spectrum of carboxymethylated $\beta$ CD ( <b>2'</b> ) prepared in ball mill (item 2 in Table 1), DS $\approx$ 4.3-4.6                           | S7  |
| Figure S 7: HSQC-DEPT spectrum of carboxymethylated $\beta$ CD ( <b>2'</b> ) prepared in ball mill (item 2 in Table 1), DS $\approx$ 4.3-4.6                            | S7  |
| Figure S 8: Proton NMR spectrum of carboxymethylated $\beta$ CD ( <b>2'</b> ) prepared in ball mill (item 3 in Table 1), DS $\approx$ 4.4-4.6                           | S8  |
| Figure S 9: HSQC-DEPT spectrum of carboxymethylated $\beta$ CD ( <b>2'</b> ) prepared in ball mill (item 3 in Table 1), DS $\approx$ 4.4-4.6                            | S8  |
| Figure S 10: Proton NMR spectrum of carboxymethylated $\beta$ CD ( <b>2'</b> ) prepared in ball mill (item 4 in Table 1), DS $\approx$ 4.4-4.6                          | S9  |
| Figure S 11: HSQC-DEPT spectrum of carboxymethylated $\beta$ CD ( <b>2'</b> ) prepared in ball mill (item 4 in Table 1), DS $\approx$ 4.4-4.6                           | S9  |
| Figure S 12: Capillary electropherogram of carboxymethylated $\beta$ CDs                                                                                                | S10 |
| Figure S 13: Proton NMR spectrum of carboxyethylated $\beta$ CD ( <b>3</b> ) prepared in solution (item 8 in Table 1), DS $\approx$ 3.0-3.4                             | S11 |
| Figure S 14: HSQC-DEPT spectrum of carboxyethylated $\beta$ CD ( <b>3</b> ) prepared in solution (item 8 in Table 1), DS $\approx$ 3.0-3.4                              | S11 |
| Figure S 15: <sup>13</sup> C-NMR spectrum of carboxyethylated $\beta$ CD ( <b>3</b> ) prepared in solution (item 8 in Table 1), DS $\approx$ 3.0-3.4                    | S12 |
| Figure S 16: ESI+ mass spectrum of carboxyethylated $\beta$ CD ( <b>3</b> ) prepared in solution (item 8 in Table 1), DS $\approx$ 3.0-3.4                              | S12 |
| Figure S 17: Peak identification in ESI+ mass spectrum of carboxyethylated $\beta$ CD ( <b>3</b> ) prepared in solution (item 8 in Table 1), DS $\approx$ 3.0-3.4       | S13 |
| Figure S 18: Proton NMR spectrum of carboxyethylated $\beta$ CD ( <b>3'</b> ) prepared in ball mill (item 5 in Table 1), DS $\approx$ 3.0-3.3                           | S14 |

|                                                                                                                                                                                                                                               |            |
|-----------------------------------------------------------------------------------------------------------------------------------------------------------------------------------------------------------------------------------------------|------------|
| Figure S 19: HSQC-DEPT spectrum of carboxyethylated $\beta$ CD ( <b>3'</b> ) prepared in ball mill (item 5 in Table 1), DS $\approx$ 3.0-3.3                                                                                                  | <b>S14</b> |
| Figure S 20: Proton NMR spectrum of carboxyethylated $\beta$ CD ( <b>3'</b> ) prepared in ball mill (item 6 in Table 1), DS $\approx$ 2.8-3.2                                                                                                 | <b>S15</b> |
| Figure S 21: HSQC-DEPT spectrum of carboxyethylated $\beta$ CD ( <b>3'</b> ) prepared in ball mill (item 6 in Table 1), DS $\approx$ 2.8-3.2                                                                                                  | <b>S15</b> |
| Figure S 22: Proton NMR spectrum of carboxyethylated $\beta$ CD ( <b>3'</b> ) prepared in ball mill (item 7 in Table 1), DS $\approx$ 2.8-3.1                                                                                                 | <b>S16</b> |
| Figure S 23: HSQC-DEPT spectrum of carboxyethylated $\beta$ CD ( <b>3'</b> ) prepared in ball mill (item 7 in Table 1), DS $\approx$ 2.8-3.1                                                                                                  | <b>S16</b> |
| Figure S 24: IR spectrum of carboxylethylated $\beta$ CD ( <b>3</b> ) prepared in solution (item 8 in Table 1) as acid, DS $\approx$ 3.0-3.4                                                                                                  | <b>S17</b> |
| Figure S 25: IR spectrum of carboxylethylated $\beta$ CD ( <b>3</b> ) prepared in solution (item 8 in Table 1) as sodium salt, DS $\approx$ 3.0-3.4                                                                                           | <b>S17</b> |
| Figure S 26: Overlay of IR spectrum of carboxylethylated $\beta$ CD acid & salt form ( <b>3</b> ) prepared in solution (item 8 in Table 1), DS $\approx$ 3.0-3.4 and carbamoylethylated $\beta$ CD prepared in ball mill (item 10 in table 1) | <b>S18</b> |
| Figure S 27: Proton NMR spectrum of carbamoylethylated $\beta$ CD ( <b>5</b> ) prepared in ball mill (item 9 in Table 1), DS $\approx$ 3.8-4.3                                                                                                | <b>S22</b> |
| Figure S 29: $^{13}\text{C}$ -NMR spectrum of carbamoylethylated $\beta$ CD ( <b>5</b> ) prepared in ball mill (item 9 in Table 1), DS $\approx$ 3.8-4.3                                                                                      | <b>S20</b> |
| Figure S 30: ESI+ mass spectrum of carbamoylethylated $\beta$ CD ( <b>5</b> ) prepared in ball mill (item 9 in Table 1), DS $\approx$ 3.8-4.3                                                                                                 | <b>S20</b> |
| Figure S 31: Peak identification in ESI+ mass spectrum of carbamoylethylated $\beta$ CD ( <b>5</b> ) prepared in ball mill (item 9 in Table 1), DS $\approx$ 3.8-4.3                                                                          | <b>S21</b> |
| Figure S 32: Proton NMR spectrum of carbamoylethylated $\beta$ CD ( <b>5</b> ) prepared in ball mill (item 10 in Table 1), DS $\approx$ 3.3-3.5                                                                                               | <b>S22</b> |
| Figure S 33: HSQC-DEPT spectrum of carbamoylethylated $\beta$ CD ( <b>5</b> ) prepared in ball mill (item 10 in Table 1), DS $\approx$ 3.3-3.5                                                                                                | <b>S22</b> |
| Figure S 34: $^{13}\text{C}$ -NMR spectrum of carbamoylethylated $\beta$ CD ( <b>5</b> ) prepared in ball mill (item 10 in Table 1), DS $\approx$ 3.3-3.5                                                                                     | <b>S31</b> |
| Figure S 35: ESI+ mass spectrum of carbamoylethylated $\beta$ CD ( <b>5</b> ) prepared in ball mill (item 10 in Table 1), DS $\approx$ 3.3-3.5                                                                                                | <b>S23</b> |
| Figure S 36: Peak identification in ESI+ mass spectrum of carbamoylethylated $\beta$ CD ( <b>5</b> ) prepared in ball mill (item 10 in Table 1), DS $\approx$ 3.8-4.3                                                                         | <b>S23</b> |
| Figure S 37: IR spectrum of carbamoylethylated $\beta$ CD ( <b>5</b> ) prepared in ball mill (item 10 in Table 1), DS $\approx$ 3.3-3.5                                                                                                       | <b>S25</b> |
| Figure S 38: IR spectrum of carbamoylethylated $\beta$ CD ( <b>5</b> ) prepared in ball mill (item 10 in Table 1), DS $\approx$ 3.3-3.5                                                                                                       | <b>S25</b> |
| Figure S 39: Overlay of IR spectra of carbamoylethylated $\beta$ CD ( <b>5</b> ) prepared in ball mill (item 9&10 in Table 1), DS $\approx$ 3.3-3.5 carboxyethylated $\beta$ CD prepared in solution (item 8 in Table 1)                      | <b>S26</b> |
| Figure S 40: Capillary electropherogram of carboxyethylated $\beta$ CDs                                                                                                                                                                       | <b>S26</b> |
| Figure S 41: Proton NMR spectrum of sulfobutylated $\beta$ CD ( <b>4</b> ) prepared in solution (item 11 in Table 1), DS $\approx$ 6.2-6.5                                                                                                    | <b>S28</b> |
| Figure S 42: HSQC-DEPT spectrum of sulfobutylated $\beta$ CD ( <b>4</b> ) prepared in solution (item 11 in Table 1), DS $\approx$ 6.2-6.5                                                                                                     | <b>S28</b> |
| Figure S 43: ESI+ mass spectrum of sulfobutylated $\beta$ CD ( <b>4</b> ) prepared in solution (item 11 in Table 1), DS $\approx$ 6.2-6.5                                                                                                     | <b>S29</b> |
| Figure S 44: Peak identification in ESI+ mass spectrum of sulfobutylated $\beta$ CD ( <b>4</b> ) prepared in solution (item 11 in Table 1), DS $\approx$ 6.2-6.5                                                                              | <b>S30</b> |

|                                                                                                                                                            |                |
|------------------------------------------------------------------------------------------------------------------------------------------------------------|----------------|
| Figure S 45: Proton NMR spectrum of sulfobutylated $\beta$ CD (4') prepared in ball mill (item 12 in Table 1), DS $\approx$ 3.1-3.3                        | <b>S31</b>     |
| Figure S 46: HSQC-DEPT spectrum of sulfobutylated $\beta$ CD (4') prepared in ball mill (item 12 in Table 1), DS $\approx$ 3.1-3.3                         | <b>S31</b>     |
| Figure S 47: Proton NMR spectrum of sulfobutylated $\beta$ CD (4') prepared in ball mill (item 13 in Table 1), DS $\approx$ 5.2-5.8                        | <b>S32</b>     |
| Figure S 48: HSQC-DEPT spectrum of sulfobutylated $\beta$ CD (4') prepared in ball mill (item 13 in Table 1), DS $\approx$ 5.2-5.8                         | <b>S32</b>     |
| Figure S 49: Proton NMR spectrum of sulfobutylated $\beta$ CD (4') prepared in ball mill (item 14 in Table 1), DS $\approx$ 6.2-6.6                        | <b>S33</b>     |
| Figure S 50: HSQC-DEPT spectrum of sulfobutylated $\beta$ CD (4') prepared in ball mill (item 14 in Table 1), DS $\approx$ 6.2-6.6                         | <b>S33</b>     |
| Figure S 51: Proton NMR spectrum of sulfobutylated $\beta$ CD (4') prepared in ball mill (item 15 in Table 1), DS $\approx$ 7.5-7.8                        | <b>S34</b>     |
| Figure S 52: HSQC-DEPT spectrum of sulfobutylated $\beta$ CD (4') prepared in ball mill (item 15 in Table 1), DS $\approx$ 7.5-7.8                         | <b>S34</b>     |
| Figure S 53: Proton NMR spectrum of sulfobutylated $\beta$ CD (4') prepared in ball mill (item 16 in Table 1), DS $\approx$ 4.4-4.9                        | <b>S35</b>     |
| Figure S 54: HSQC-DEPT spectrum of sulfobutylated $\beta$ CD (4') prepared in ball mill (item 16 in Table 1), DS $\approx$ 4.4-4.9                         | <b>S35</b>     |
| Figure S 55: Proton NMR spectrum of sulfobutylated $\beta$ CD (4') prepared in ball mill (item 17 in Table 1), DS $\approx$ 6.9-7.5                        | <b>S36</b>     |
| Figure S 56: HSQC-DEPT spectrum of sulfobutylated $\beta$ CD (4') prepared in ball mill (item 17 in Table 1), DS $\approx$ 6.9-7.5                         | <b>S36</b>     |
| Figure S 57: Proton NMR spectrum of 4-hydroxy-1-butanefulfonic acid sodium salt (HOBSANa)                                                                  | <b>S37</b>     |
| Figure S 58: HSQC-DEPT spectrum of HOBSANa                                                                                                                 | <b>S37</b>     |
| Figure S 59: Proton NMR spectrum of di(1,1'-sulfonatobutyl)ether disodium salt (disodium 4,4'-oxydibutane-1,1'-disulfonate, BIBSANA)                       | <b>S38</b>     |
| Figure S 60: HSQC-DEPT spectrum of BIBSANA                                                                                                                 | <b>S38</b>     |
| Figure S 61: Capillary electropherogram of sulfobutylated $\beta$ CDs                                                                                      | <b>S39</b>     |
| <br>Scheme S 1: Carbon atom numbering for the NMR assignment (OH: unsubstituted; OR: substituted)                                                          | <br><b>S40</b> |
| <br>Table S 1: Proton assignment of cyclodextrin derivatives prepared in solution (based on $^1\text{H}$ - and HSQC-DEPT experiments)                      | <br><b>S40</b> |
| Table S 2: Carbon assignment of cyclodextrin derivatives prepared in solution (based on $^{13}\text{C}$ - and HSQC-DEPT experiments)                       | <b>S41</b>     |
| <br>Table S 3: Characteristic C=O IR bands of the prepared (carbonyl)ethyl group containing CD derivatives                                                 | <br><b>S41</b> |
| <br>Table S 4: $R_F$ -values of the prepared compounds after twice run of the same plate in the same solvent mixture at 7 cm distance in 100 $\mu\text{g}$ | <br><b>S41</b> |
| <br>References                                                                                                                                             | <br><b>S42</b> |

|                        |                      |                      |                                                            |                        |                      |
|------------------------|----------------------|----------------------|------------------------------------------------------------|------------------------|----------------------|
| Acquisition Time (sec) | 3.6438               | Comment              | CMB CD LJ00SOL_1H_D2O_131016_2056_rg=90                    | Date                   | 13 Oct 2016 14:05:20 |
| Date Stamp             | 13 Oct 2016 14:05:20 | File Name            | D:\Docs\1\1\Notebooks\1M_Reactions\NMR\CMB CD LJ00SOL\1fid | Nucleus                | 1H                   |
| Frequency (MHz)        | 300.13               | Number of Transients | 64                                                         | Origin                 | spect                |
| Owner                  | root                 | Pulse Sequence       | zg                                                         | Receiver Gain          | 90.50                |
| Solvent                | CDCl3                | Spectrum Offset (Hz) | 1093.5470                                                  | Sweep Width (Hz)       | 4496.37              |
|                        |                      | Spectrum Type        | STANDARD                                                   | Original Points Count  | 16384                |
|                        |                      |                      |                                                            | SW(cyclical) (Hz)      | 4496.40              |
|                        |                      |                      |                                                            | Temperature (degree C) | 20.360               |

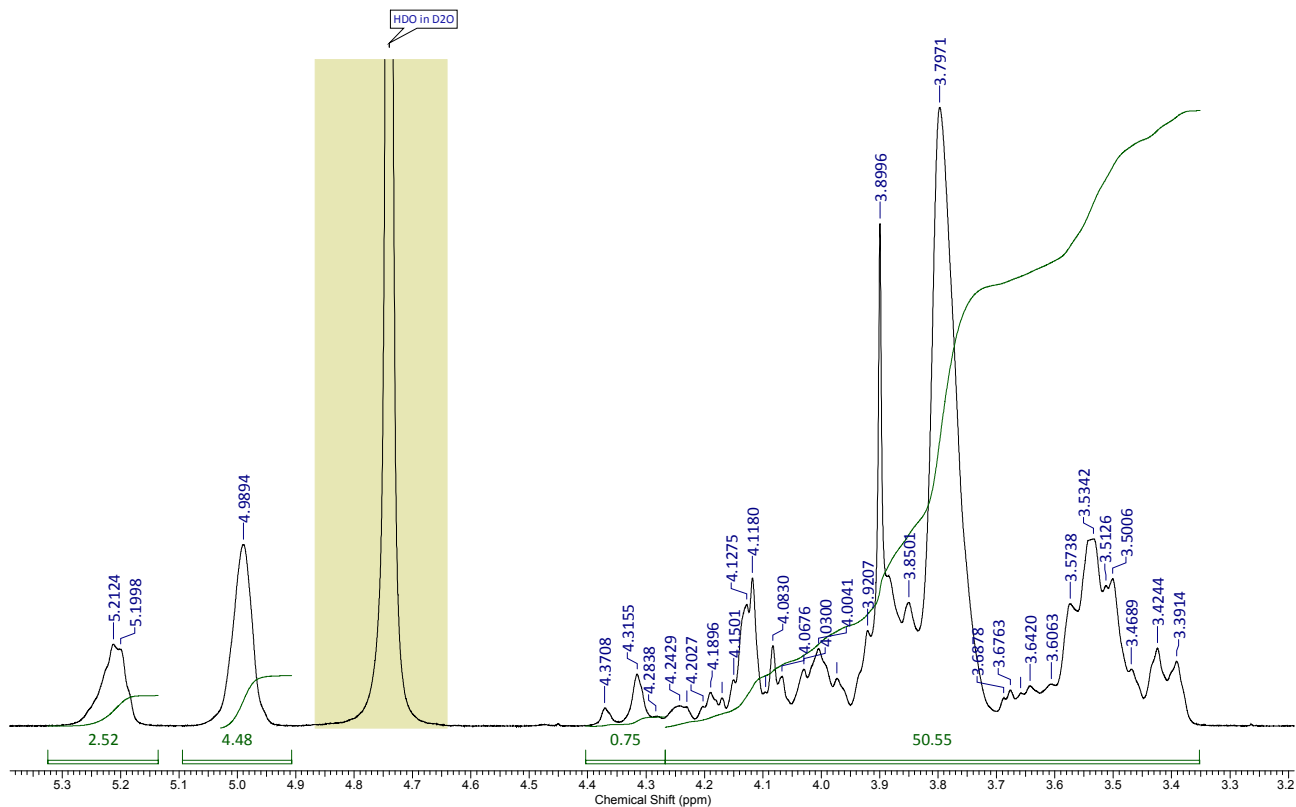

Figure S 1: Proton NMR spectrum of carboxymethylated  $\beta$ CD (2) prepared in solution (item 1 in Table 1),  $DS \approx 4.3-4.5$

|                        |                                                             |                        |                                 |                       |                                           |
|------------------------|-------------------------------------------------------------|------------------------|---------------------------------|-----------------------|-------------------------------------------|
| Acquisition Time (sec) | (0.0427, 0.0051)                                            | Comment                | 5 mm BBO 1H-BB Z-GRD Z8284/0059 | Date                  | 13 Oct 2016 13:59:34                      |
| File Name              | D:\Docs\1\1\Notebooks\1M_Reactions\NMR\CMB CD LJ00SOL\2\ser | Frequency (MHz)        | (300.13, 75.47)                 | Nucleus               | (1H, 13C)                                 |
| Number of Transients   | 32                                                          | Origin                 | spect                           | Original Points Count | (128, 64)                                 |
| Points Count           | (4096, 256)                                                 | Pulse Sequence         | hsqcdeptg                       | Solvent               | DMSO                                      |
| Sweep Width (Hz)       | (2996.87, 12451.17)                                         | Temperature (degree C) | 20.460                          | Title                 | CMB CD LJ00SOL HSQC_D2O_131016_2056_rg=90 |

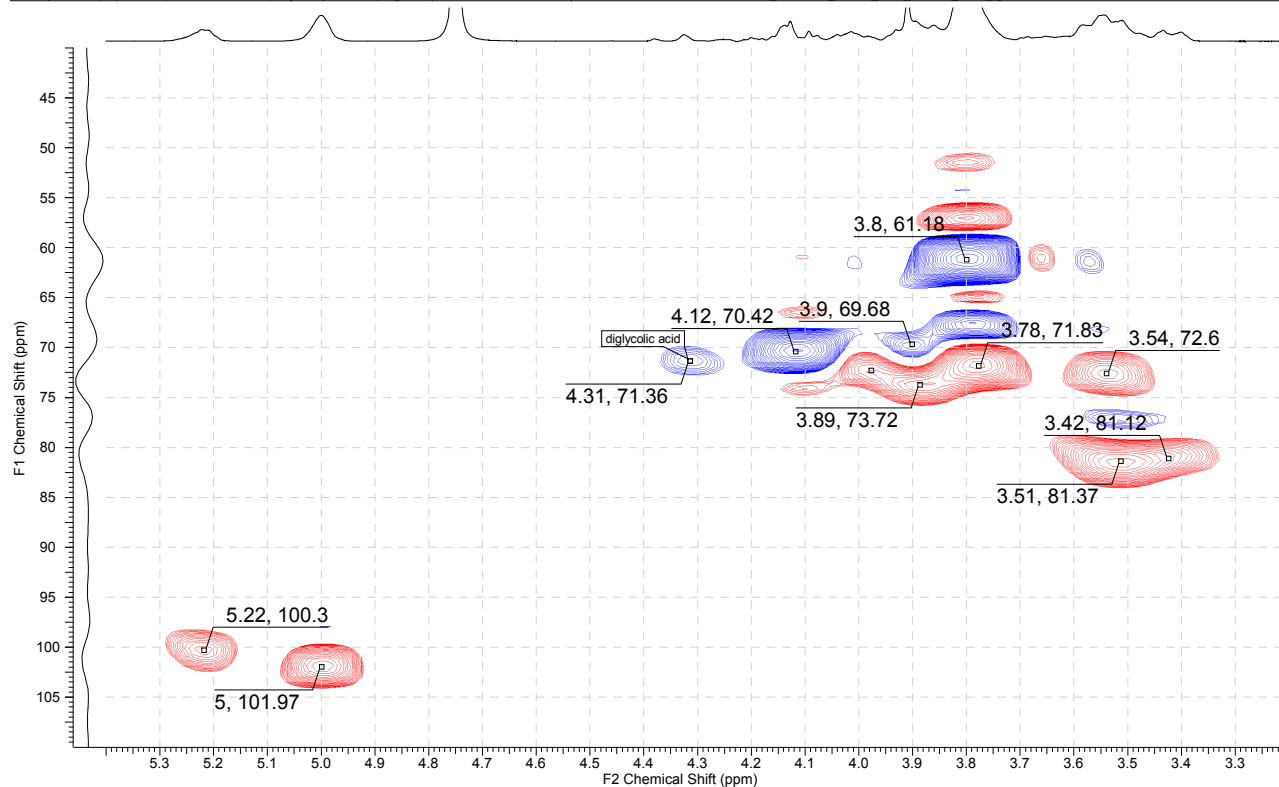

Figure S 2: HSQC-DEPT spectrum of carboxymethylated  $\beta$ CD (2) prepared in solution (item 1 in Table 1),  $DS \approx 4.3-4.5$

|                        |                      |                      |                                                         |                        |                      |
|------------------------|----------------------|----------------------|---------------------------------------------------------|------------------------|----------------------|
| Acquisition Time (sec) | 1.8088               | Comment              | CMBCD_LJ02_13C_D2O_230117_2134_RG=100                   | Date                   | 23 Jan 2017 08:10:56 |
| Date Stamp             | 23 Jan 2017 08:10:56 | File Name            | E:\Documents\1\Molecules\Anal\CarbonNMR\CMBCD_LJ02\2fid | Origin                 | spect                |
| Frequency (MHz)        | 75.47                | Nucleus              | 13C                                                     | Number of Transients   | 627                  |
| Owner                  | root                 | Points Count         | 262144                                                  | Pulse Sequence         | zgpq.save.txt        |
| Solvent                | D2O                  | Spectrum Offset (Hz) | 8301.4463                                               | Receiver Gain          | 13004.00             |
|                        |                      | Spectrum Type        | STANDARD                                                | SW(cyclical) (Hz)      | 18115.87             |
|                        |                      |                      |                                                         | Sweep Width (Hz)       | 18115.87             |
|                        |                      |                      |                                                         | Temperature (degree C) | 20.460               |

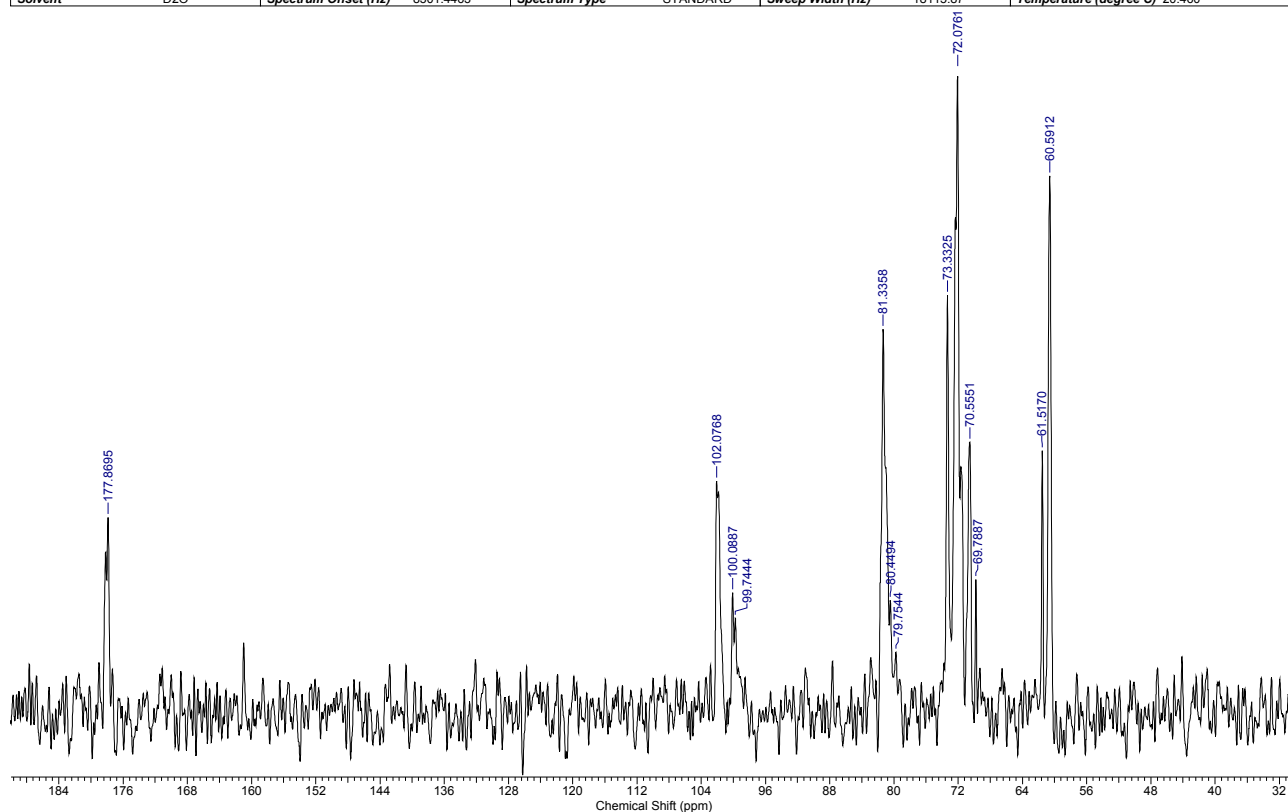

Figure S 3:  $^{13}\text{C}$ -NMR spectrum of carboxymethylated  $\beta\text{CD}$  (2) prepared in solution (item 1 in Table 1), DS  $\approx 4.3$ -4.5

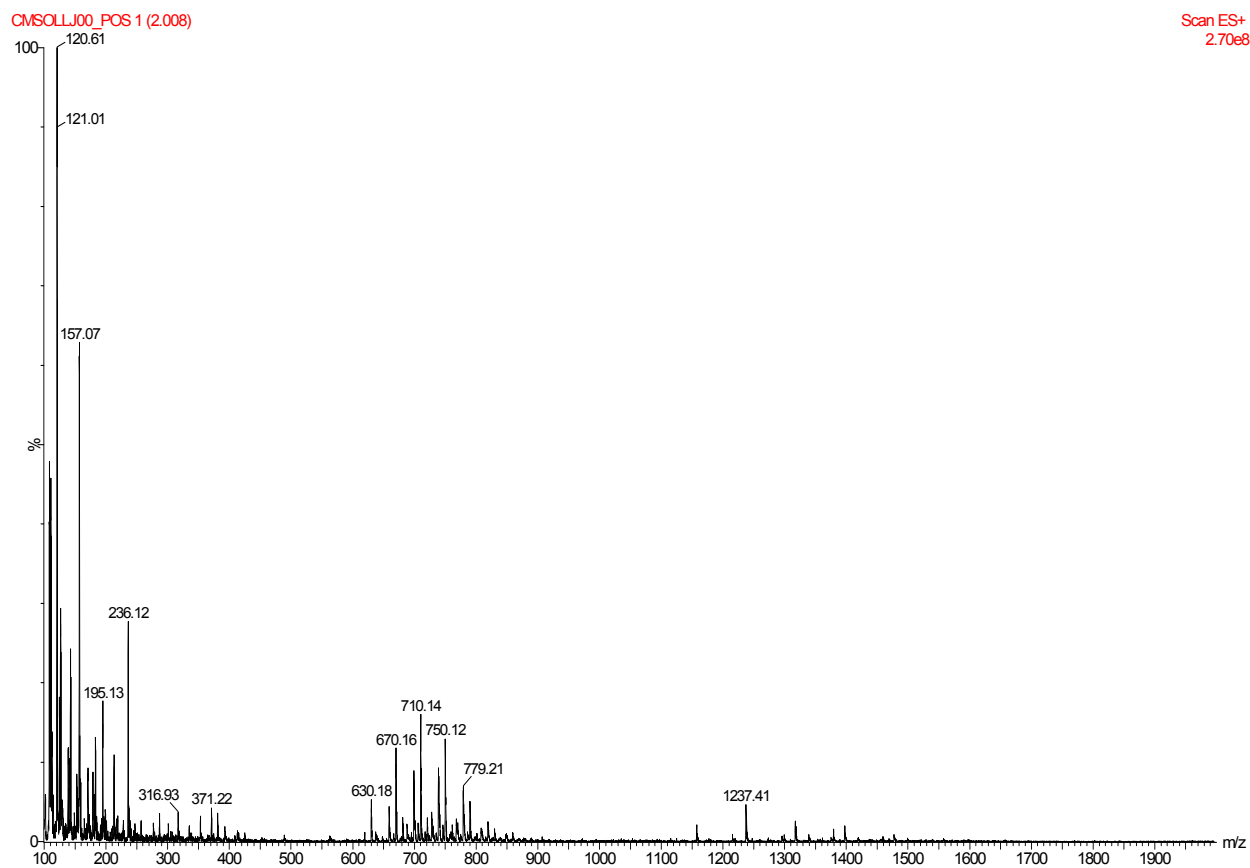

Figure S 4: ESI+ mass spectrum of carboxymethylated  $\beta\text{CD}$  (2) prepared in solution (item 1 in Table 1), DS  $\approx 4.3$ -4.5

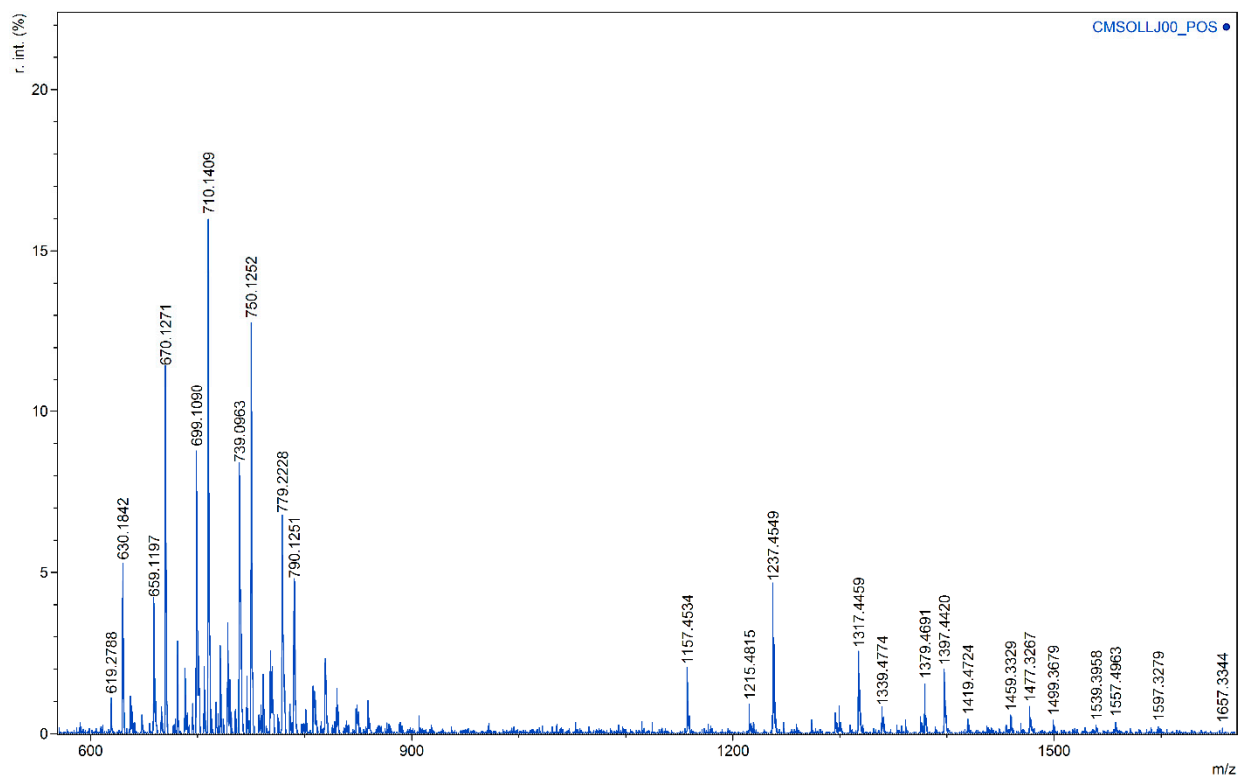

| Meas. m/z | Calc. m/z | $\delta$ (Da) | z | Annotation                                                                | Formula                                                                                                                                                                                                                             |
|-----------|-----------|---------------|---|---------------------------------------------------------------------------|-------------------------------------------------------------------------------------------------------------------------------------------------------------------------------------------------------------------------------------|
| 630.1842  | 630.1678  | 0.0164        | 2 | (+1 CH <sub>2</sub> COONa) <sub>2</sub>                                   | (C <sub>42</sub> H <sub>70</sub> O <sub>35</sub> Na <sub>2</sub> ) <sub>1</sub> (CH <sub>1</sub> COONa) <sub>1</sub>                                                                                                                |
| 659.1197  | 659.1706  | -0.0509       | 2 | (+1 CH <sub>2</sub> COOH+1 CH <sub>2</sub> COONa) <sub>2</sub>            | (C <sub>42</sub> H <sub>70</sub> O <sub>35</sub> Na <sub>2</sub> ) <sub>1</sub> (CH <sub>1</sub> COOH) <sub>1</sub> (CH <sub>1</sub> COONa) <sub>1</sub>                                                                            |
| 699.1090  | 699.1760  | -0.0670       | 2 | (+1 CH <sub>2</sub> COOH +2 HCOOH +1 HCOONa) <sub>2</sub>                 | (C <sub>42</sub> H <sub>70</sub> O <sub>35</sub> Na <sub>2</sub> ) <sub>1</sub> (CH <sub>1</sub> COOH) <sub>1</sub> (CH <sub>1</sub> COONa) <sub>0</sub> (HCOOH) <sub>2</sub> (HCOONa) <sub>1</sub> (H <sub>2</sub> O) <sub>0</sub> |
| 710.1409  | 710.1670  | -0.0261       | 2 | (+1 CH <sub>2</sub> COOH +1 HCOOH +2 HCOONa) <sub>2</sub>                 | (C <sub>42</sub> H <sub>70</sub> O <sub>35</sub> Na <sub>2</sub> ) <sub>1</sub> (CH <sub>1</sub> COOH) <sub>1</sub> (CH <sub>1</sub> COONa) <sub>0</sub> (HCOOH) <sub>1</sub> (HCOONa) <sub>2</sub> (H <sub>2</sub> O) <sub>0</sub> |
| 739.0963  | 739.1697  | -0.0734       | 2 | (+2 CH <sub>2</sub> COOH +1 HCOOH +2 HCOONa) <sub>2</sub>                 | (C <sub>42</sub> H <sub>70</sub> O <sub>35</sub> Na <sub>2</sub> ) <sub>1</sub> (CH <sub>1</sub> COOH) <sub>2</sub> (CH <sub>1</sub> COONa) <sub>0</sub> (HCOOH) <sub>1</sub> (HCOONa) <sub>2</sub> (H <sub>2</sub> O) <sub>0</sub> |
| 750.1252  | 750.1607  | -0.0355       | 2 | (+2 CHCOOH +3 HCOONa) <sub>2</sub>                                        | (C <sub>42</sub> H <sub>70</sub> O <sub>35</sub> Na <sub>2</sub> ) <sub>1</sub> (CH <sub>1</sub> COOH) <sub>2</sub> (CH <sub>1</sub> COONa) <sub>0</sub> (HCOOH) <sub>0</sub> (HCOONa) <sub>3</sub> (H <sub>2</sub> O) <sub>0</sub> |
| 779.2228  | 779.1635  | 0.0593        | 2 | (+3 CH <sub>2</sub> COOH +3 HCOONa) <sub>2</sub>                          | (C <sub>42</sub> H <sub>70</sub> O <sub>35</sub> Na <sub>2</sub> ) <sub>1</sub> (CH <sub>1</sub> COOH) <sub>3</sub> (CH <sub>1</sub> COONa) <sub>0</sub> (HCOOH) <sub>0</sub> (HCOONa) <sub>3</sub> (H <sub>2</sub> O) <sub>0</sub> |
| 790.1251  | 790.1544  | -0.0293       | 2 | (+2 CH <sub>2</sub> COOH +1 CH <sub>2</sub> COONa +3 HCOONa) <sub>2</sub> | (C <sub>42</sub> H <sub>70</sub> O <sub>35</sub> Na <sub>2</sub> ) <sub>1</sub> (CH <sub>1</sub> COOH) <sub>2</sub> (CH <sub>1</sub> COONa) <sub>1</sub> (HCOOH) <sub>0</sub> (HCOONa) <sub>3</sub> (H <sub>2</sub> O) <sub>0</sub> |
| 1157.4534 | 1157.3590 | 0.0944        | 1 | C <sub>42</sub> H <sub>70</sub> O <sub>35</sub> (βCD)                     | C <sub>42</sub> H <sub>70</sub> O <sub>35</sub> Na                                                                                                                                                                                  |
| 1215.4815 | 1215.3645 | 0.1171        | 1 | +1 CH <sub>2</sub> COOH                                                   | (C <sub>42</sub> H <sub>70</sub> O <sub>35</sub> Na)CH <sub>1</sub> COOH                                                                                                                                                            |
| 1237.4549 | 1237.3464 | 0.1085        | 1 | +1 CH <sub>2</sub> COONa                                                  | (C <sub>42</sub> H <sub>70</sub> O <sub>35</sub> Na)CH <sub>1</sub> COONa                                                                                                                                                           |
| 1317.4459 | 1317.3338 | 0.1120        | 1 | +2 CH <sub>2</sub> COONa                                                  | (C <sub>42</sub> H <sub>70</sub> O <sub>35</sub> Na) <sub>1</sub> (CH <sub>1</sub> COOH) <sub>0</sub> (CH <sub>1</sub> COONa) <sub>2</sub> (HCOOH) <sub>0</sub> (HCOONa) <sub>0</sub> (H <sub>2</sub> O) <sub>0</sub>               |
| 1379.4691 | 1379.4177 | 0.0515        | 1 | +1 CH <sub>2</sub> COOH +2 HCOOH +4 H <sub>2</sub> O                      | (C <sub>42</sub> H <sub>70</sub> O <sub>35</sub> Na) <sub>1</sub> (CH <sub>1</sub> COOH) <sub>1</sub> (CH <sub>1</sub> COONa) <sub>0</sub> (HCOOH) <sub>2</sub> (HCOONa) <sub>0</sub> (H <sub>2</sub> O) <sub>4</sub>               |
| 1397.4420 | 1397.3213 | 0.1207        | 1 | +3 CH <sub>2</sub> COONa                                                  | (C <sub>42</sub> H <sub>70</sub> O <sub>35</sub> Na) <sub>1</sub> (CH <sub>1</sub> COOH) <sub>0</sub> (CH <sub>1</sub> COONa) <sub>3</sub> (HCOOH) <sub>0</sub> (HCOONa) <sub>0</sub> (H <sub>2</sub> O) <sub>0</sub>               |
| 1419.4724 | 1419.3267 | 0.1457        | 1 | +1 CH <sub>2</sub> COOH +3 HCOONa                                         | (C <sub>42</sub> H <sub>70</sub> O <sub>35</sub> Na) <sub>1</sub> (CH <sub>1</sub> COOH) <sub>1</sub> (CH <sub>1</sub> COONa) <sub>0</sub> (HCOOH) <sub>0</sub> (HCOONa) <sub>3</sub> (H <sub>2</sub> O) <sub>0</sub>               |
| 1459.3329 | 1459.4051 | -0.0722       | 1 | +1 CH <sub>2</sub> COOH +1 CH <sub>2</sub> COONa                          | (C <sub>42</sub> H <sub>70</sub> O <sub>35</sub> Na) <sub>1</sub> (CH <sub>1</sub> COOH) <sub>1</sub> (CH <sub>1</sub> COONa) <sub>1</sub> (HCOOH) <sub>2</sub> (HCOONa) <sub>0</sub> (H <sub>2</sub> O) <sub>4</sub>               |
| 1477.3267 | 1477.4181 | -0.0913       | 1 | +3 CH <sub>2</sub> COOH +2 HCOOH +3 H <sub>2</sub> O                      | (C <sub>42</sub> H <sub>70</sub> O <sub>35</sub> Na) <sub>1</sub> (CH <sub>1</sub> COOH) <sub>3</sub> (CH <sub>1</sub> COONa) <sub>0</sub> (HCOOH) <sub>2</sub> (HCOONa) <sub>0</sub> (H <sub>2</sub> O) <sub>3</sub>               |
| 1499.3679 | 1499.4000 | -0.0322       | 1 | +3 CH <sub>2</sub> COOH +1 HCOOH +1 HCOONa +3 H <sub>2</sub> O            | (C <sub>42</sub> H <sub>70</sub> O <sub>35</sub> Na) <sub>1</sub> (CH <sub>1</sub> COOH) <sub>3</sub> (CH <sub>1</sub> COONa) <sub>0</sub> (HCOOH) <sub>1</sub> (HCOONa) <sub>1</sub> (H <sub>2</sub> O) <sub>3</sub>               |
| 1539.3958 | 1539.3925 | 0.0032        | 1 | +3 CH <sub>2</sub> COOH +2 HCOONa +4 H <sub>2</sub> O                     | (C <sub>42</sub> H <sub>70</sub> O <sub>35</sub> Na) <sub>1</sub> (CH <sub>1</sub> COOH) <sub>3</sub> (CH <sub>1</sub> COONa) <sub>0</sub> (HCOOH) <sub>0</sub> (HCOONa) <sub>2</sub> (H <sub>2</sub> O) <sub>4</sub>               |
| 1557.4963 | 1557.3196 | 0.1767        | 1 | +2 CH <sub>2</sub> COOH +1 CH <sub>2</sub> COONa +3 HCOONa                | (C <sub>42</sub> H <sub>70</sub> O <sub>35</sub> Na) <sub>1</sub> (CH <sub>1</sub> COOH) <sub>2</sub> (CH <sub>1</sub> COONa) <sub>1</sub> (HCOOH) <sub>0</sub> (HCOONa) <sub>3</sub> (H <sub>2</sub> O) <sub>0</sub>               |
| 1597.3279 | 1597.3980 | -0.0701       | 1 | +4 CH <sub>2</sub> COOH +2 HCOONa +4 H <sub>2</sub> O                     | (C <sub>42</sub> H <sub>70</sub> O <sub>35</sub> Na) <sub>1</sub> (CH <sub>1</sub> COOH) <sub>4</sub> (CH <sub>1</sub> COONa) <sub>0</sub> (HCOOH) <sub>0</sub> (HCOONa) <sub>2</sub> (H <sub>2</sub> O) <sub>4</sub>               |
| 1657.3344 | 1657.4215 | -0.0872       | 1 | +6 CH <sub>2</sub> COOH +1 CH <sub>2</sub> COONa +4 H <sub>2</sub> O      | (C <sub>42</sub> H <sub>70</sub> O <sub>35</sub> Na) <sub>1</sub> (CH <sub>1</sub> COOH) <sub>6</sub> (CH <sub>1</sub> COONa) <sub>1</sub> (HCOOH) <sub>0</sub> (HCOONa) <sub>0</sub> (H <sub>2</sub> O) <sub>4</sub>               |

Figure S 5: Peak identification in ESI+ mass spectrum of carboxymethylated βCD (2) prepared in solution (item 1 in Table 1), DS ≈4.3-4.5 [1,2]

|                        |                      |                      |                                                       |                      |          |                      |         |                        |         |
|------------------------|----------------------|----------------------|-------------------------------------------------------|----------------------|----------|----------------------|---------|------------------------|---------|
| Acquisition Time (sec) | 3.6438               | Comment              | CMBcD_LJ01 (20mg in 0.6ml D2O)                        |                      | Date     | 28 Sep 2016 11:33:52 |         |                        |         |
| Date Stamp             | 28 Sep 2016 11:33:52 | File Name            | D:\Docs\1\Notebooks\BM_Reactions\NMR\CMBcD_LJ01\1\fid |                      |          |                      |         |                        |         |
| Frequency (MHz)        | 300.13               | Nucleus              | 1H                                                    | Number of Transients | 64       | Origin               | spect   | Original Points Count  | 16384   |
| Owner                  | root                 | Points Count         | 131072                                                | Pulse Sequence       | zg       | Receiver Gain        | 50.80   | SW(cyclical) (Hz)      | 4496.40 |
| Solvent                | CDCI3                | Spectrum Offset (Hz) | 1096.0339                                             | Spectrum Type        | STANDARD | Sweep Width (Hz)     | 4496.37 | Temperature (degree C) | 22.260  |

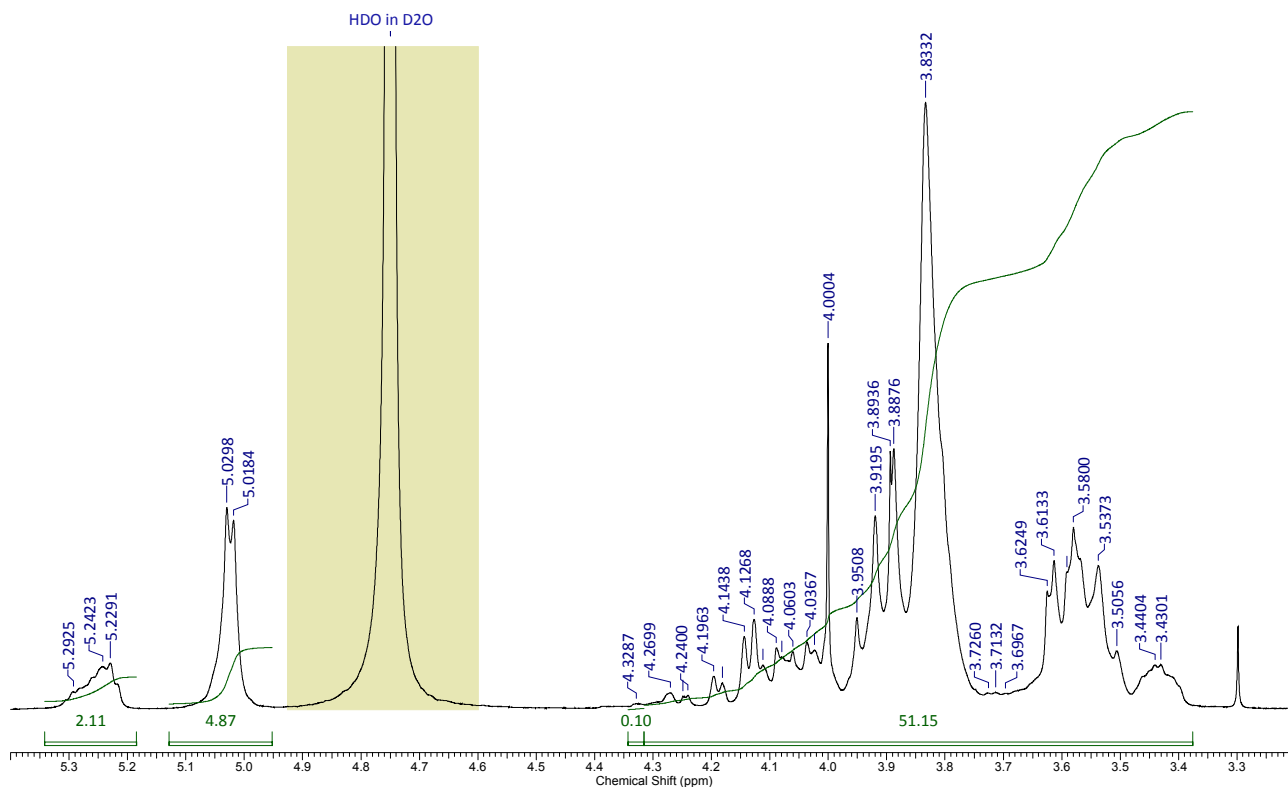

Figure S 6: Proton NMR spectrum of carboxymethylated  $\beta$ CD ( $2'$ ) prepared in ball mill (item 2 in Table 1),  $DS \approx 4.3-4.6$

|                        |                                                       |                        |                                 |  |                       |                      |  |
|------------------------|-------------------------------------------------------|------------------------|---------------------------------|--|-----------------------|----------------------|--|
| Acquisition Time (sec) | (0.0427, 0.0051)                                      | Comment                | 5 mm BBO 1H-BB Z-GRD Z8284/0059 |  | Date                  | 28 Sep 2016 12:27:24 |  |
| File Name              | D:\Docs\1\Notebooks\BM_Reactions\NMR\CMBcD_LJ01\2\ser | Frequency (MHz)        | (300.13, 75.47)                 |  | Nucleus               | (1H, 13C)            |  |
| Number of Transients   | 32                                                    | Origin                 | spect                           |  | Original Points Count | (128, 64)            |  |
| Points Count           | (512, 256)                                            | Pulse Sequence         | hsqcetdtp                       |  | Solvent               | DMSO                 |  |
| Sweep Width (Hz)       | (2991.75, 12451.17)                                   | Temperature (degree C) | 22.260                          |  | Spectrum Type         | HSQC-DEPT            |  |

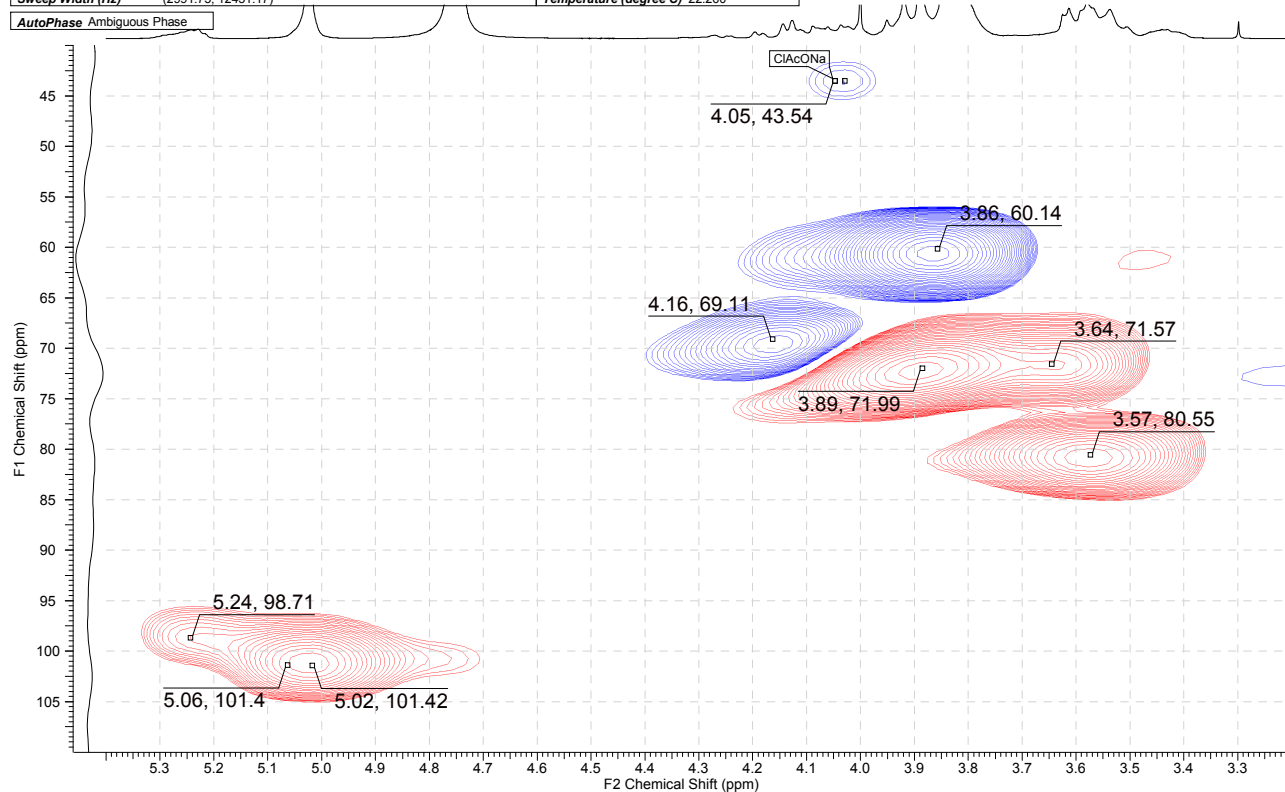

Figure S 7: HSQC-DEPT spectrum of carboxymethylated  $\beta$ CD ( $2'$ ) prepared in ball mill (item 2 in Table 1),  $DS \approx 4.3-4.6$

|                        |                      |                      |                                                          |                      |          |                      |         |                       |         |
|------------------------|----------------------|----------------------|----------------------------------------------------------|----------------------|----------|----------------------|---------|-----------------------|---------|
| Acquisition Time (sec) | 3.6438               | Comment              | CBCD_LJ02 (20mg in 0.6ml D2O)                            |                      | Date     | 30 Sep 2016 15:20:00 |         |                       |         |
| Date Stamp             | 30 Sep 2016 15:20:00 | File Name            | D:\Docs\1\1\Notebooks\BM_Reactions\NMR\CMB\CD_LJ02\1.tif |                      |          |                      |         |                       |         |
| Frequency (MHz)        | 300.13               | Nucleus              | 1H                                                       | Number of Transients | 64       | Origin               | spect   | Original Points Count | 16384   |
| Owner                  | root                 | Points Count         | 131072                                                   | Pulse Sequence       | zg       | Receiver Gain        | 101.60  | SW(cyclical) (Hz)     | 4496.40 |
| Solvent                | DEUTERIUM OXIDE      | Spectrum Offset (Hz) | 1096.2397                                                | Spectrum Type        | STANDARD | Sweep Width (Hz)     | 4496.37 |                       |         |
| Temperature (degree C) | 22.160               |                      |                                                          |                      |          |                      |         |                       |         |

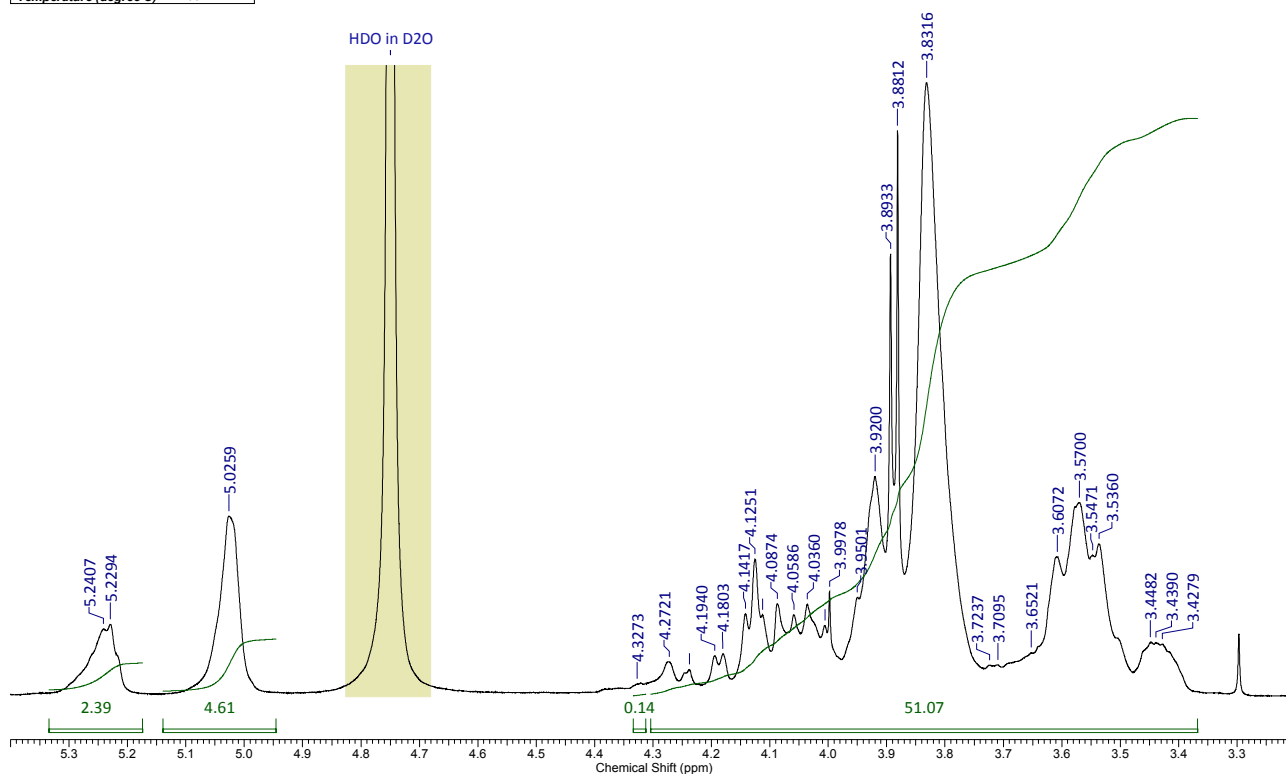

Figure S 8: Proton NMR spectrum of carboxymethylated  $\beta$ CD ( $2'$ ) prepared in ball mill (item 3 in Table 1),  $DS \approx 4.4-4.6$

|                        |                                                          |                        |                                 |                       |                                                  |                      |           |  |  |
|------------------------|----------------------------------------------------------|------------------------|---------------------------------|-----------------------|--------------------------------------------------|----------------------|-----------|--|--|
| Acquisition Time (sec) | (0.0427, 0.0051)                                         | Comment                | 5 mm BBO 1H-BB Z-GRD Z8284/0059 |                       | Date                                             | 03 Oct 2016 09:51:00 |           |  |  |
| File Name              | D:\Docs\1\1\Notebooks\BM_Reactions\NMR\CMB\CD_LJ02\2\ser | Frequency (MHz)        | (300.13, 75.47)                 |                       | Nucleus                                          | (1H, 13C)            |           |  |  |
| Number of Transients   | 32                                                       | Origin                 | spect                           | Original Points Count | (128, 64)                                        | Owner                | psm       |  |  |
| Points Count           | (512, 256)                                               | Pulse Sequence         | hsqcetdgp                       | Solvent               | DMSO                                             | Spectrum Type        | HSQC-DEPT |  |  |
| Sweep Width (Hz)       | (2991.75, 12451.17)                                      | Temperature (degree C) | 21.760                          | Title                 | CBCD_LJ02 (20mg in 0.6ml D2O)_HSQC_03102016_2032 |                      |           |  |  |

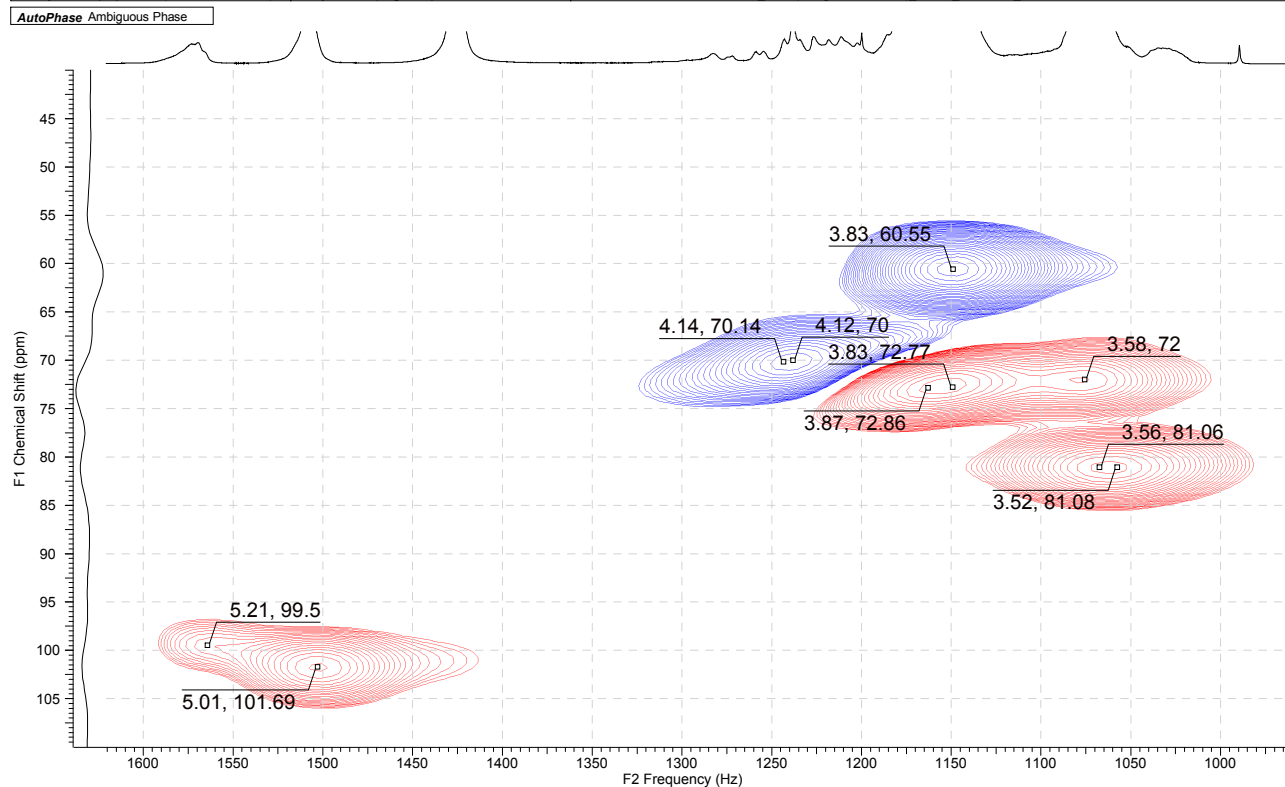

Figure S 9: HSQC-DEPT spectrum of carboxymethylated  $\beta$ CD ( $2'$ ) prepared in ball mill (item 3 in Table 1),  $DS \approx 4.4-4.6$



|                        |                      |                      |                                                         |                        |                      |
|------------------------|----------------------|----------------------|---------------------------------------------------------|------------------------|----------------------|
| Acquisition Time (sec) | 3.6438               | Comment              | CMBCD-LJ03 1H D2O 041016 2036 RG=50                     | Date                   | 04 Oct 2016 15:34:56 |
| Date Stamp             | 04 Oct 2016 15:34:56 | File Name            | D:\Docs\1\1\Notebooks\BM_Reactions\NMR\CMBCD_LJ03\11fid | Nucleus                | 1H                   |
| Frequency (MHz)        | 300.13               | Points Count         | 131072                                                  | Number of Transients   | 64                   |
| Owner                  | root                 | Pulse Sequence       | zg                                                      | Origin                 | spect                |
| Solvent                | CDCI3                | Spectrum Offset (Hz) | 1095.7936                                               | Receiver Gain          | 50.80                |
|                        |                      | Spectrum Type        | STANDARD                                                | SW(cyclical) (Hz)      | 4496.40              |
|                        |                      |                      |                                                         | Sweep Width (Hz)       | 4496.37              |
|                        |                      |                      |                                                         | Temperature (degree C) | 22.660               |

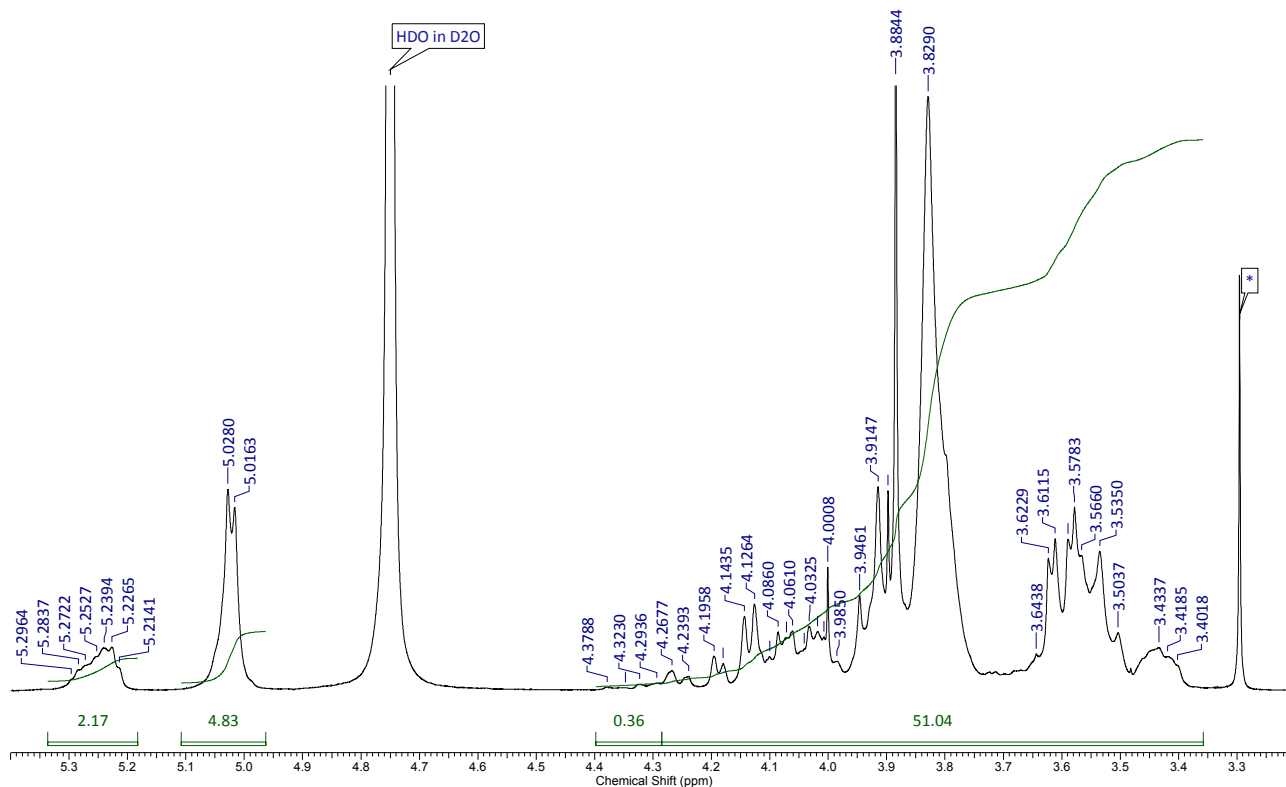

Figure S 10: Proton NMR spectrum of carboxymethylated  $\beta$ CD ( $2'$ ) prepared in ball mill (item 4 in Table 1),  $DS \approx 4.4-4.6$

|                        |                                                         |                        |                                 |                       |                                       |
|------------------------|---------------------------------------------------------|------------------------|---------------------------------|-----------------------|---------------------------------------|
| Acquisition Time (sec) | (0.0427, 0.0051)                                        | Comment                | 5 mm BBO 1H-BB Z-GRD Z8284/0059 | Date                  | 04 Oct 2016 16:28:22                  |
| File Name              | D:\Docs\1\1\Notebooks\BM_Reactions\NMR\CMBCD_LJ03\2\ser | Frequency (MHz)        | (300.13, 75.47)                 | Nucleus               | (1H, 13C)                             |
| Number of Transients   | 32                                                      | Origin                 | spect                           | Original Points Count | (128, 64)                             |
| Points Count           | (512, 256)                                              | Pulse Sequence         | hsqcetdtp                       | Solvent               | DMSO                                  |
| Sweep Width (Hz)       | (2991.75, 12451.17)                                     | Temperature (degree C) | 22.760                          | Title                 | CMBCD-LJ03 HSQC D2O 041016 2036 RG=50 |

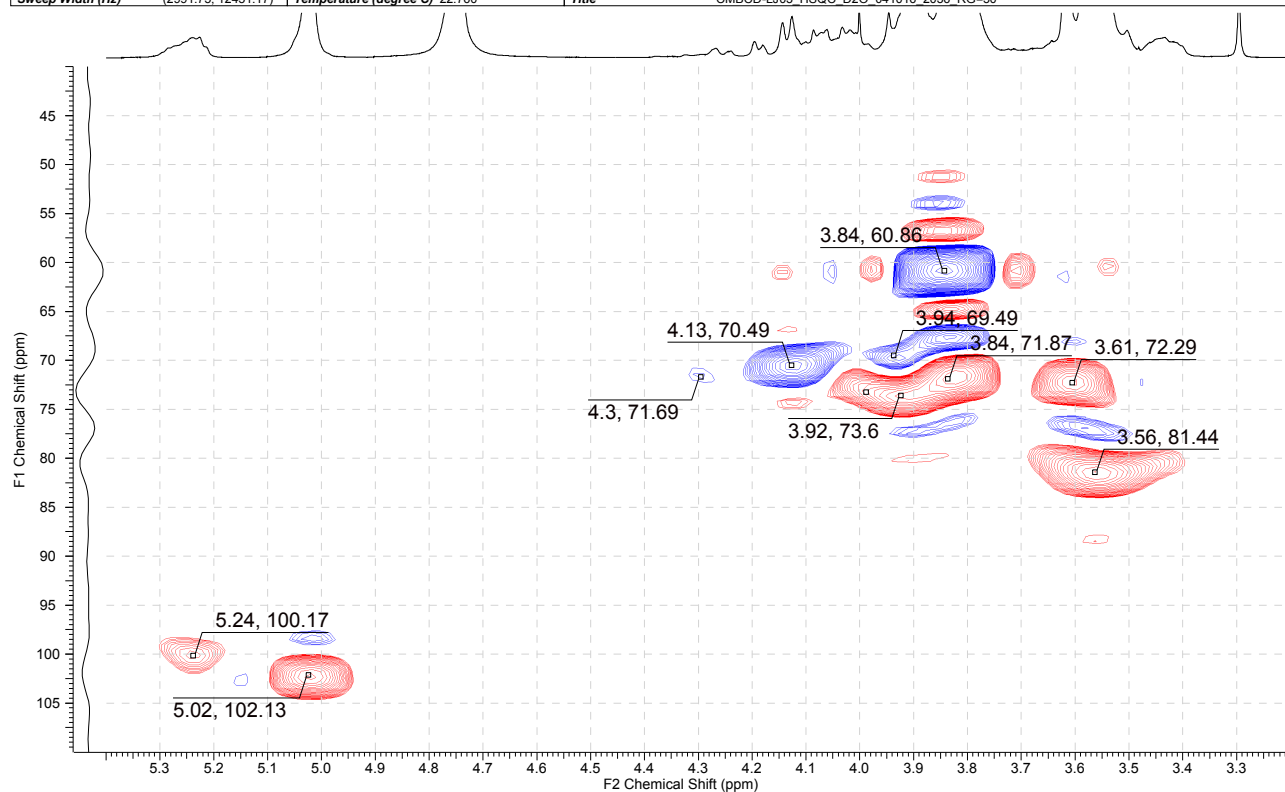

Figure S 11: HSQC-DEPT spectrum of carboxymethylated  $\beta$ CD ( $2'$ ) prepared in ball mill (item 4 in Table 1),  $DS \approx 4.4-4.6$

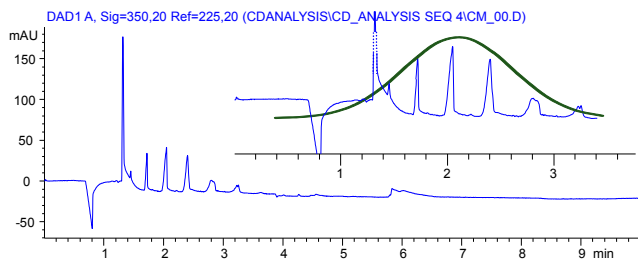

Carboxymethylated  $\beta$ CD (2) DS 4.3-4.5, synthesized in solution (item 1 in Table 1)

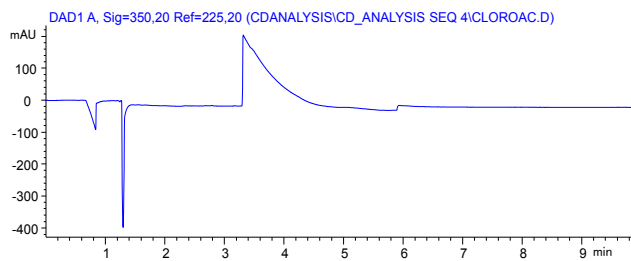

Chloroacetic acid sodium salt

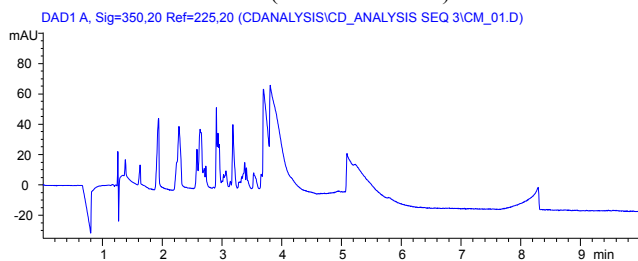

Carboxymethylated  $\beta$ CD (2') DS 4.3-4.6, synthesis in ball mill (item 2 in Table 1)

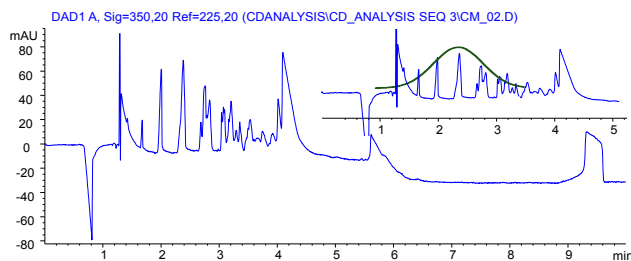

Carboxymethylated  $\beta$ CD (2') DS 4.4-4.6, synthesis in ball mill (item 3 in Table 1)

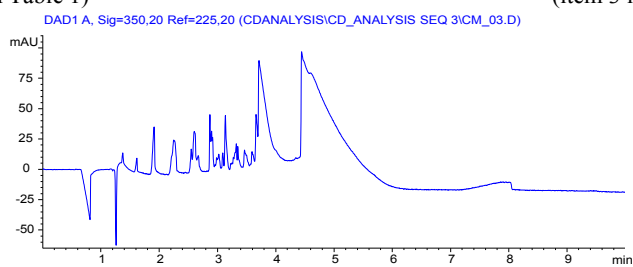

Carboxymethylated  $\beta$ CD (2') DS 4.4-4.6, synthesis in ball mill (item 4 in Table 1)

Figure S 12: Capillary electropherogram of carboxymethylated  $\beta$ CDs

|                        |                      |                      |                                               |                        |                      |
|------------------------|----------------------|----------------------|-----------------------------------------------|------------------------|----------------------|
| Acquisition Time (sec) | 3.6438               | Comment              | CE_LJ00SOL_1H_D2O_131016_2057_rg=90           | Date                   | 13 Oct 2016 15:17:52 |
| Date Stamp             | 13 Oct 2016 15:17:52 | File Name            | E:\docs\1\molecules\Anah\NMR\CE_LJ00SOL\1\fid | Frequency (MHz)        | 300.13               |
| Nucleus                | 1H                   | Number of Transients | 64                                            | Origin                 | spect                |
| Points Count           | 262144               | Pulse Sequence       | zg                                            | Original Points Count  | 16384                |
| Spectrum Offset (Hz)   | 1096.8828            | Spectrum Type        | STANDARD                                      | Receiver Gain          | 90.50                |
|                        |                      |                      |                                               | SW(cyclical) (Hz)      | 4496.40              |
|                        |                      |                      |                                               | Solvent                | DEUTERIUM OXIDE      |
|                        |                      |                      |                                               | Sweep Width (Hz)       | 4496.39              |
|                        |                      |                      |                                               | Temperature (degree C) | 20.160               |

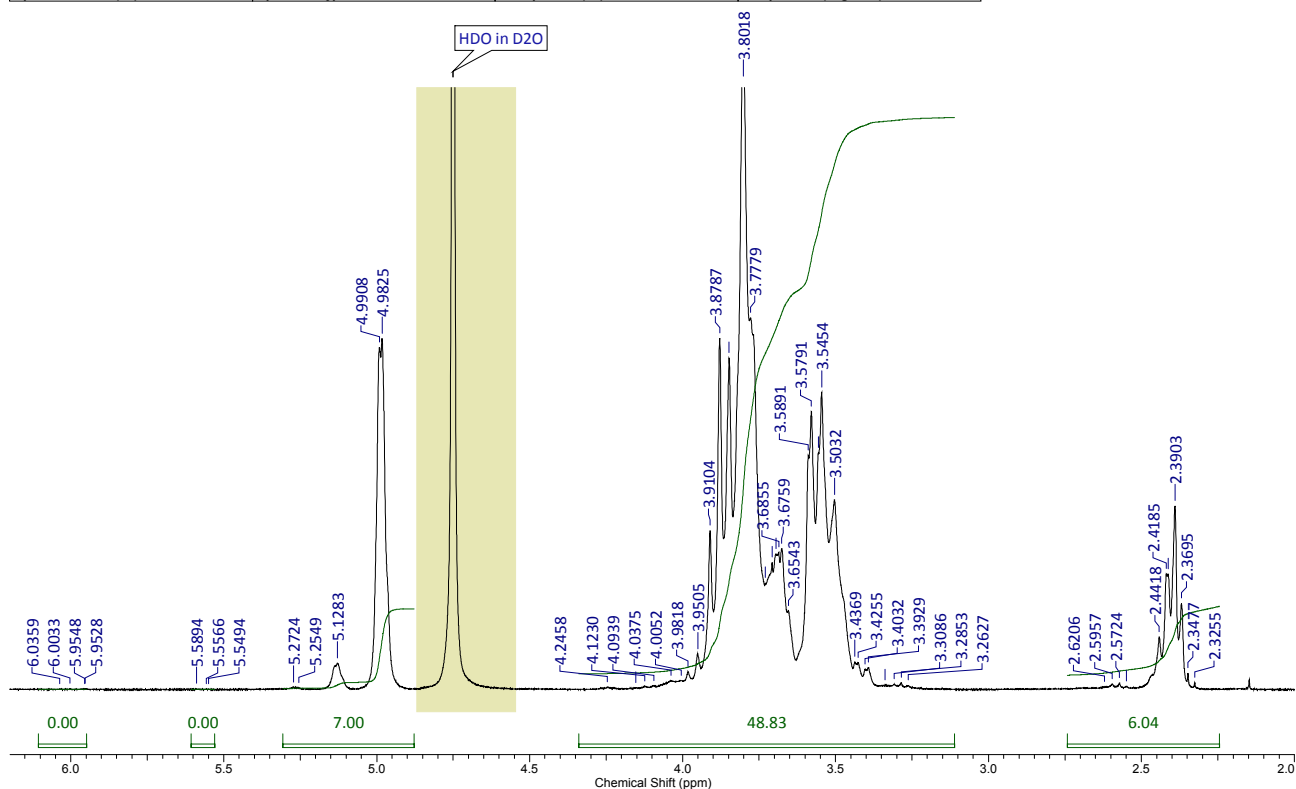

Figure S 13: Proton NMR spectrum of carboxyethylated  $\beta$ CD (3) prepared in solution (item 8 in Table 1),  $DS \approx 3.0-3.4$

|                        |                                                        |                        |                                 |                       |                                       |
|------------------------|--------------------------------------------------------|------------------------|---------------------------------|-----------------------|---------------------------------------|
| Acquisition Time (sec) | (0.0427, 0.0051)                                       | Comment                | 5 mm BBO 1H-BB Z-GRD Z8284/0059 | Date                  | 13 Oct 2016 16:11:42                  |
| File Name              | D:\Docs\1\Notebooks\BM_Reactions\NMR\CE_LJ00SOL\2\iser | Frequency (MHz)        | (300.13, 75.47)                 | Nucleus               | (1H, 13C)                             |
| Number of Transients   | 32                                                     | Origin                 | spect                           | Original Points Count | (128, 64)                             |
| Points Count           | (1024, 512)                                            | Pulse Sequence         | hsqcetgtp                       | Solvent               | DMSO                                  |
| Sweep Width (Hz)       | (2994.67, 12475.59)                                    | Temperature (degree C) | 20.260                          | Title                 | CE_LJ00SOL_HSQC_D2O_131016_2057_rg=90 |

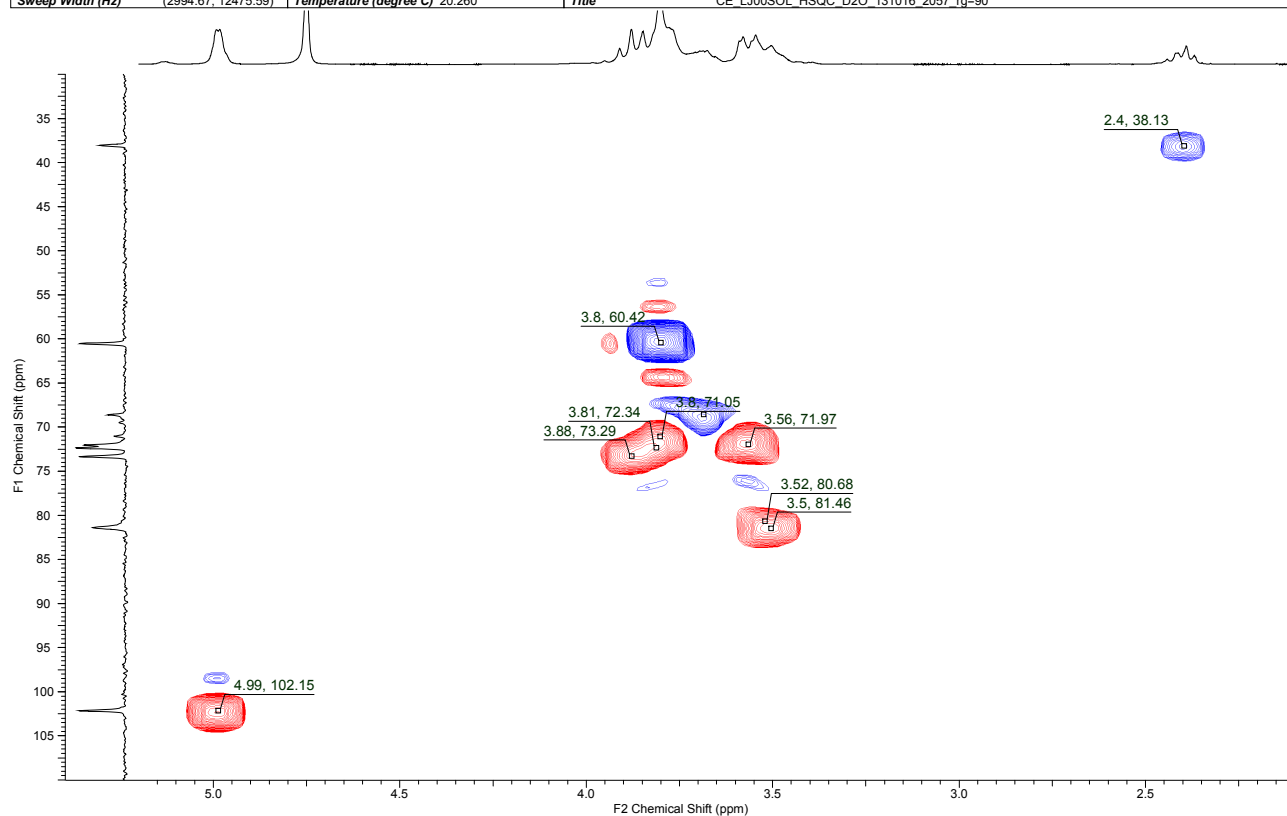

Figure S 14: HSQC-DEPT spectrum of carboxyethylated  $\beta$ CD (3) prepared in solution (item 8 in Table 1),  $DS \approx 3.0-3.4$

|                        |                      |                      |                                                              |                      |                      |
|------------------------|----------------------|----------------------|--------------------------------------------------------------|----------------------|----------------------|
| Acquisition Time (sec) | 1.8088               | Comment              | CEbCD_LJ00sol (700 ul D2O)                                   | Date                 | 20 Jan 2017 16:10:56 |
| Date Stamp             | 20 Jan 2017 16:10:56 | File Name            | E:\Documents\11\Molecules\Anal\CarbonNMR\CEbCD_LJ00SOL\1.tif |                      |                      |
| Frequency (MHz)        | 75.47                | Nucleus              | 13C                                                          | Number of Transients | 480                  |
| Owner                  | root                 | Points Count         | 262144                                                       | Pulse Sequence       | zgpg.save.txt        |
| Solvent                | CHLOROFORM-d         | Spectrum Offset (Hz) | 8301.4463                                                    | Receiver Gain        | 13004.00             |
| Temperature (degree C) | 20.960               | Spectrum Type        | STANDARD                                                     | SW(cyclical) (Hz)    | 18115.87             |
|                        |                      |                      |                                                              | Sweep Width (Hz)     | 18115.87             |

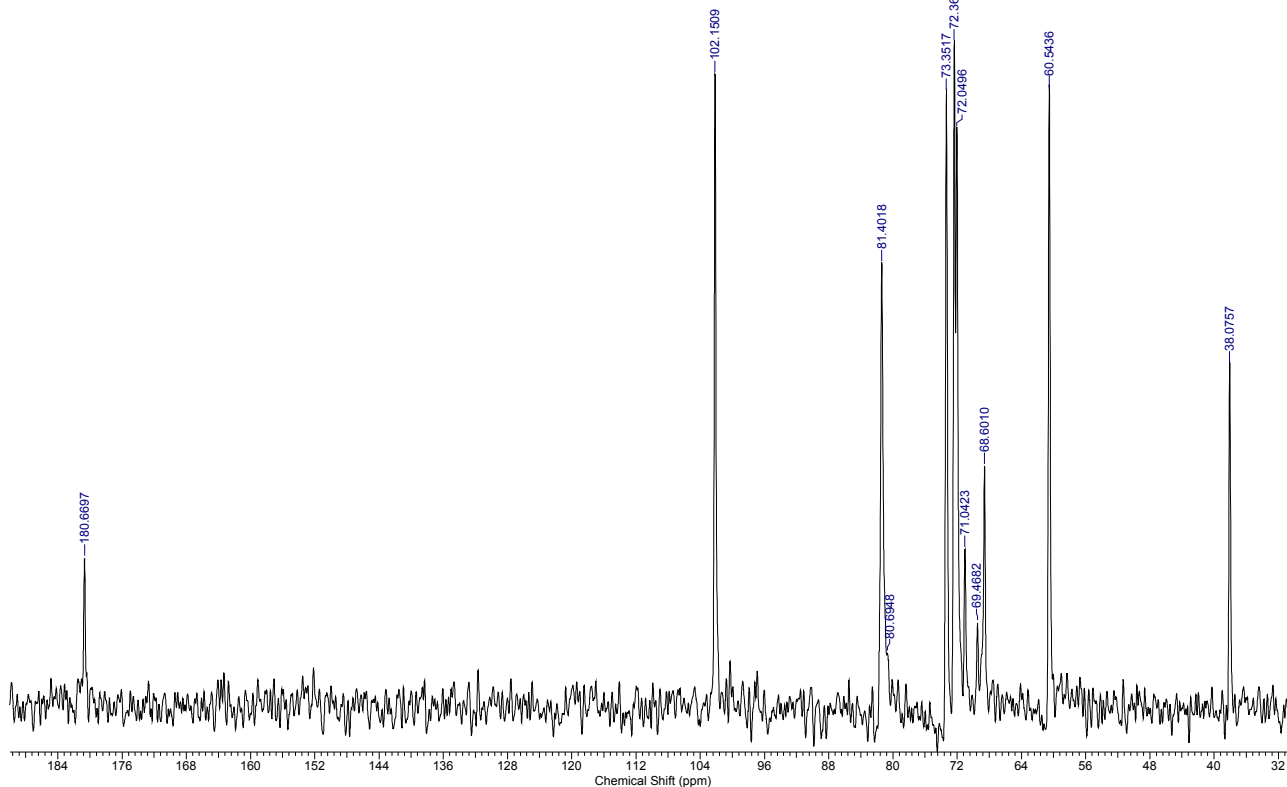

Figure S 15:  $^{13}\text{C}$ -NMR spectrum of carboxyethylated  $\beta\text{CD}$  (**3**) prepared in solution (item 8 in Table 1), DS  $\approx 3.0$ -3.4

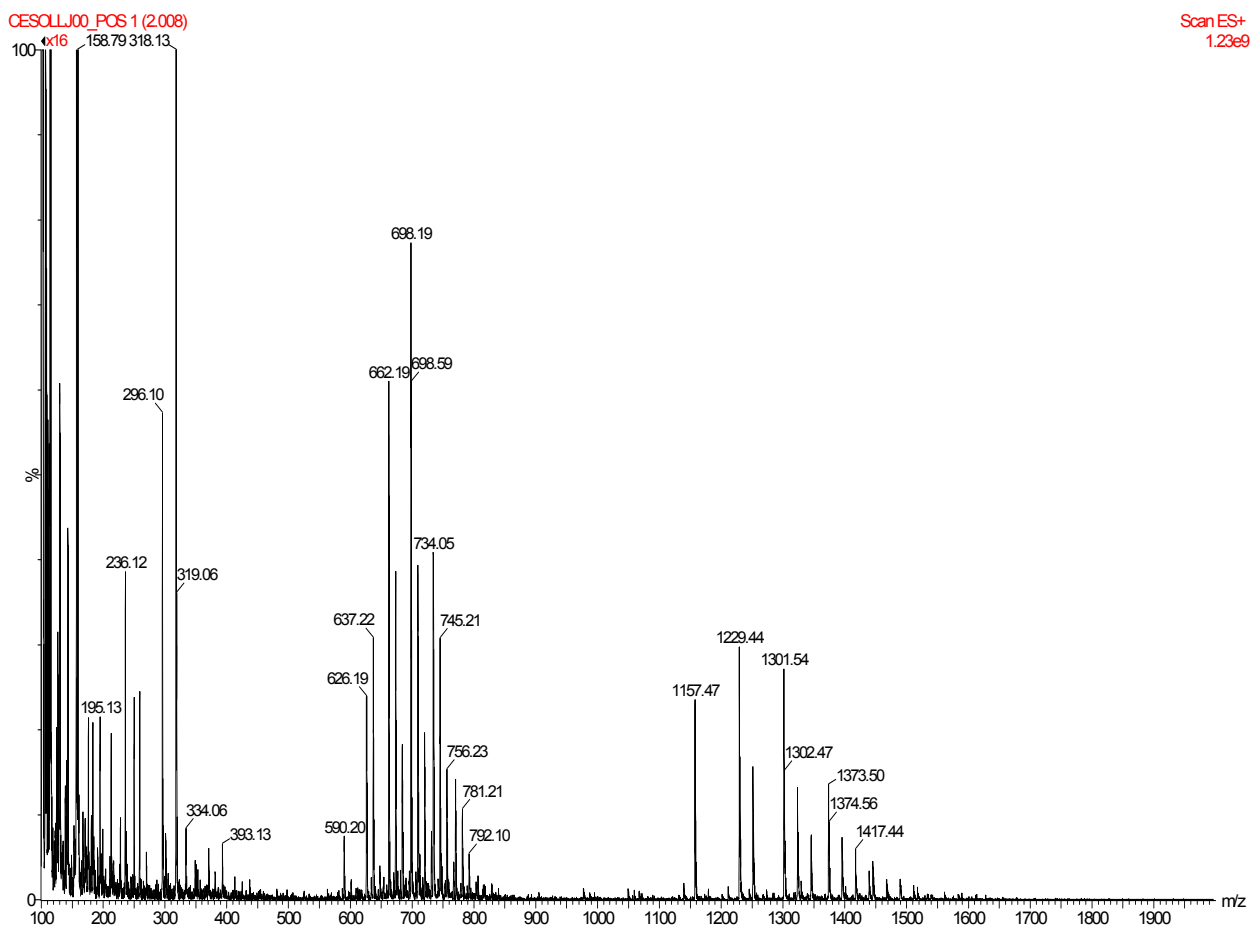

Figure S 16: ESI+ mass spectrum of carboxyethylated  $\beta\text{CD}$  (**3**) prepared in solution (item 8 in Table 1), DS  $\approx 3.0$ -3.4

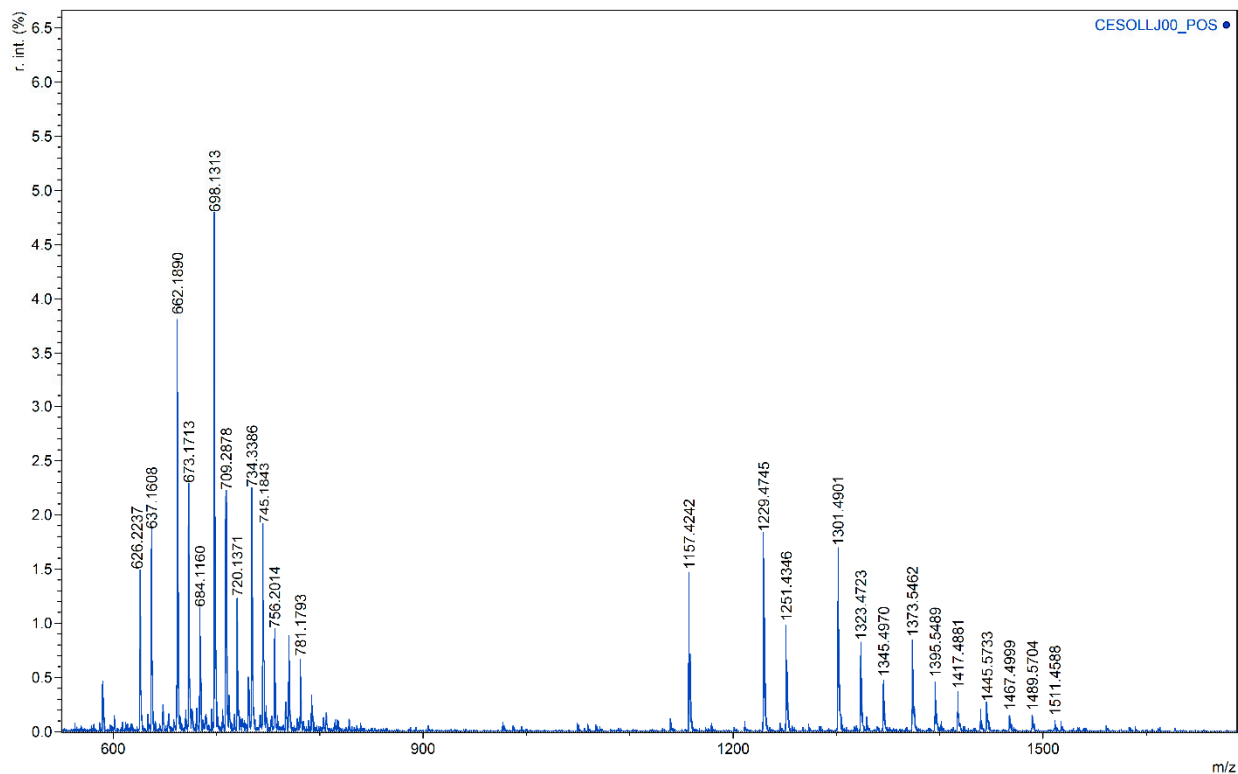

| Meas. m/z | Calc. m/z | $\delta$ (Da) | Z | Annotation                                                                                       | Formula                                                                                                                                                                                  |
|-----------|-----------|---------------|---|--------------------------------------------------------------------------------------------------|------------------------------------------------------------------------------------------------------------------------------------------------------------------------------------------|
| 626.2237  | 626.1847  | 0.0390        | 2 | (+1 CH <sub>2</sub> CH <sub>2</sub> COOH) <sub>2</sub>                                           | (C <sub>42</sub> H <sub>70</sub> O <sub>35</sub> Na <sub>2</sub> ) <sub>1</sub> (CH <sub>1</sub> CH <sub>2</sub> COOH) <sub>1</sub> (CH <sub>1</sub> CH <sub>2</sub> COONa) <sub>0</sub> |
| 637.1608  | 637.1756  | -0.0148       | 2 | (+1 CH <sub>2</sub> CH <sub>2</sub> COONa) <sub>2</sub>                                          | (C <sub>42</sub> H <sub>70</sub> O <sub>35</sub> Na <sub>2</sub> ) <sub>1</sub> (CH <sub>1</sub> CH <sub>2</sub> COOH) <sub>0</sub> (CH <sub>1</sub> CH <sub>2</sub> COONa) <sub>1</sub> |
| 662.1890  | 662.1952  | -0.0063       | 2 | (+2 CH <sub>2</sub> CH <sub>2</sub> COOH) <sub>2</sub>                                           | (C <sub>42</sub> H <sub>70</sub> O <sub>35</sub> Na <sub>2</sub> ) <sub>1</sub> (CH <sub>1</sub> CH <sub>2</sub> COOH) <sub>2</sub> (CH <sub>1</sub> CH <sub>2</sub> COONa) <sub>0</sub> |
| 673.1713  | 673.1862  | -0.0149       | 2 | (+1 CH <sub>2</sub> CH <sub>2</sub> COOH + 1 CH <sub>2</sub> CH <sub>2</sub> COONa) <sub>2</sub> | (C <sub>42</sub> H <sub>70</sub> O <sub>35</sub> Na <sub>2</sub> ) <sub>1</sub> (CH <sub>1</sub> CH <sub>2</sub> COOH) <sub>1</sub> (CH <sub>1</sub> CH <sub>2</sub> COONa) <sub>1</sub> |
| 684.1160  | 684.1772  | -0.0611       | 2 | (+2 CH <sub>2</sub> CH <sub>2</sub> COONa) <sub>2</sub>                                          | (C <sub>42</sub> H <sub>70</sub> O <sub>35</sub> Na <sub>2</sub> ) <sub>1</sub> (CH <sub>1</sub> CH <sub>2</sub> COOH) <sub>0</sub> (CH <sub>1</sub> CH <sub>2</sub> COONa) <sub>2</sub> |
| 698.1313  | 698.2058  | -0.0745       | 2 | (+3 CH <sub>2</sub> CH <sub>2</sub> COOH) <sub>2</sub>                                           | (C <sub>42</sub> H <sub>70</sub> O <sub>35</sub> Na <sub>2</sub> ) <sub>1</sub> (CH <sub>1</sub> CH <sub>2</sub> COOH) <sub>3</sub> (CH <sub>1</sub> CH <sub>2</sub> COONa) <sub>0</sub> |
| 709.2878  | 709.1968  | 0.0911        | 2 | (+2 CH <sub>2</sub> CH <sub>2</sub> COOH + 1 CH <sub>2</sub> CH <sub>2</sub> COONa) <sub>2</sub> | (C <sub>42</sub> H <sub>70</sub> O <sub>35</sub> Na <sub>2</sub> ) <sub>1</sub> (CH <sub>1</sub> CH <sub>2</sub> COOH) <sub>2</sub> (CH <sub>1</sub> CH <sub>2</sub> COONa) <sub>1</sub> |
| 720.1371  | 720.1877  | -0.0507       | 2 | (+1 CH <sub>2</sub> CH <sub>2</sub> COOH + 2 CH <sub>2</sub> CH <sub>2</sub> COONa) <sub>2</sub> | (C <sub>42</sub> H <sub>70</sub> O <sub>35</sub> Na <sub>2</sub> ) <sub>1</sub> (CH <sub>1</sub> CH <sub>2</sub> COOH) <sub>1</sub> (CH <sub>1</sub> CH <sub>2</sub> COONa) <sub>2</sub> |
| 734.3386  | 734.2164  | 0.1223        | 2 | (+4 CH <sub>2</sub> CH <sub>2</sub> COOH) <sub>2</sub>                                           | (C <sub>42</sub> H <sub>70</sub> O <sub>35</sub> Na <sub>2</sub> ) <sub>1</sub> (CH <sub>1</sub> CH <sub>2</sub> COOH) <sub>4</sub> (CH <sub>1</sub> CH <sub>2</sub> COONa) <sub>0</sub> |
| 745.1843  | 745.2073  | -0.0230       | 2 | (+3 CH <sub>2</sub> CH <sub>2</sub> COOH + 1 CH <sub>2</sub> CH <sub>2</sub> COONa) <sub>2</sub> | (C <sub>42</sub> H <sub>70</sub> O <sub>35</sub> Na <sub>2</sub> ) <sub>1</sub> (CH <sub>1</sub> CH <sub>2</sub> COOH) <sub>3</sub> (CH <sub>1</sub> CH <sub>2</sub> COONa) <sub>1</sub> |
| 756.2014  | 756.1983  | 0.0031        | 2 | (+2 CH <sub>2</sub> CH <sub>2</sub> COOH + 2 CH <sub>2</sub> CH <sub>2</sub> COONa) <sub>2</sub> | (C <sub>42</sub> H <sub>70</sub> O <sub>35</sub> Na <sub>2</sub> ) <sub>1</sub> (CH <sub>1</sub> CH <sub>2</sub> COOH) <sub>2</sub> (CH <sub>1</sub> CH <sub>2</sub> COONa) <sub>2</sub> |
| 770.2052  | 770.2269  | -0.0217       | 2 | +5 CH <sub>2</sub> CH <sub>2</sub> COOH                                                          | (C <sub>42</sub> H <sub>70</sub> O <sub>35</sub> Na <sub>2</sub> ) <sub>1</sub> (CH <sub>1</sub> CH <sub>2</sub> COOH) <sub>5</sub> (CH <sub>1</sub> CH <sub>2</sub> COONa) <sub>0</sub> |
| 781.1793  | 781.2179  | -0.0386       | 2 | (+4 CH <sub>2</sub> CH <sub>2</sub> COOH + 1 CH <sub>2</sub> CH <sub>2</sub> COONa) <sub>2</sub> | (C <sub>42</sub> H <sub>70</sub> O <sub>35</sub> Na <sub>2</sub> ) <sub>1</sub> (CH <sub>1</sub> CH <sub>2</sub> COOH) <sub>4</sub> (CH <sub>1</sub> CH <sub>2</sub> COONa) <sub>1</sub> |
| 792.1803  | 792.2089  | -0.0286       | 2 | (+3 CH <sub>2</sub> CH <sub>2</sub> COOH + 2 CH <sub>2</sub> CH <sub>2</sub> COONa) <sub>2</sub> | (C <sub>42</sub> H <sub>70</sub> O <sub>35</sub> Na <sub>2</sub> ) <sub>1</sub> (CH <sub>1</sub> CH <sub>2</sub> COOH) <sub>3</sub> (CH <sub>1</sub> CH <sub>2</sub> COONa) <sub>2</sub> |
| 1157.4242 | 1157.3590 | 0.0652        | 1 | C <sub>42</sub> H <sub>70</sub> O <sub>35</sub> (BCD)                                            | C <sub>42</sub> H <sub>70</sub> O <sub>35</sub> Na                                                                                                                                       |
| 1229.4745 | 1229.3801 | 0.0944        | 1 | +1 CH <sub>2</sub> CH <sub>2</sub> COOH                                                          | (C <sub>42</sub> H <sub>70</sub> O <sub>35</sub> Na) <sub>1</sub> (CH <sub>1</sub> CH <sub>2</sub> COOH) <sub>1</sub> (CH <sub>1</sub> CH <sub>2</sub> COONa) <sub>0</sub>               |
| 1251.4346 | 1251.3621 | 0.0726        | 1 | +1 CH <sub>2</sub> CH <sub>2</sub> COONa                                                         | (C <sub>42</sub> H <sub>70</sub> O <sub>35</sub> Na) <sub>1</sub> (CH <sub>1</sub> CH <sub>2</sub> COOH) <sub>0</sub> (CH <sub>1</sub> CH <sub>2</sub> COONa) <sub>1</sub>               |
| 1301.4901 | 1301.4012 | 0.0888        | 1 | +2 CH <sub>2</sub> CH <sub>2</sub> COOH                                                          | (C <sub>42</sub> H <sub>70</sub> O <sub>35</sub> Na) <sub>1</sub> (CH <sub>1</sub> CH <sub>2</sub> COOH) <sub>2</sub> (CH <sub>1</sub> CH <sub>2</sub> COONa) <sub>0</sub>               |
| 1323.4723 | 1323.3832 | 0.0891        | 1 | +1 CH <sub>2</sub> CH <sub>2</sub> COOH + 1 CH <sub>2</sub> CH <sub>2</sub> COONa                | (C <sub>42</sub> H <sub>70</sub> O <sub>35</sub> Na) <sub>1</sub> (CH <sub>1</sub> CH <sub>2</sub> COOH) <sub>1</sub> (CH <sub>1</sub> CH <sub>2</sub> COONa) <sub>1</sub>               |
| 1345.4970 | 1345.3651 | 0.1319        | 1 | +2 CH <sub>2</sub> CH <sub>2</sub> COONa                                                         | (C <sub>42</sub> H <sub>70</sub> O <sub>35</sub> Na) <sub>1</sub> (CH <sub>1</sub> CH <sub>2</sub> COOH) <sub>0</sub> (CH <sub>1</sub> CH <sub>2</sub> COONa) <sub>2</sub>               |
| 1373.5462 | 1373.4224 | 0.1239        | 1 | +3 CH <sub>2</sub> CH <sub>2</sub> COOH                                                          | (C <sub>42</sub> H <sub>70</sub> O <sub>35</sub> Na) <sub>1</sub> (CH <sub>1</sub> CH <sub>2</sub> COOH) <sub>3</sub> (CH <sub>1</sub> CH <sub>2</sub> COONa) <sub>0</sub>               |
| 1395.5489 | 1395.4043 | 0.1446        | 1 | +2 CH <sub>2</sub> CH <sub>2</sub> COOH + 1 CH <sub>2</sub> CH <sub>2</sub> COONa                | (C <sub>42</sub> H <sub>70</sub> O <sub>35</sub> Na) <sub>1</sub> (CH <sub>1</sub> CH <sub>2</sub> COOH) <sub>2</sub> (CH <sub>1</sub> CH <sub>2</sub> COONa) <sub>1</sub>               |
| 1417.4881 | 1417.3863 | 0.1019        | 1 | +1 CH <sub>2</sub> CH <sub>2</sub> COOH + 2 CH <sub>2</sub> CH <sub>2</sub> COONa                | (C <sub>42</sub> H <sub>70</sub> O <sub>35</sub> Na) <sub>1</sub> (CH <sub>1</sub> CH <sub>2</sub> COOH) <sub>1</sub> (CH <sub>1</sub> CH <sub>2</sub> COONa) <sub>2</sub>               |
| 1445.5733 | 1445.4435 | 0.1298        | 1 | +4 CH <sub>2</sub> CH <sub>2</sub> COOH                                                          | (C <sub>42</sub> H <sub>70</sub> O <sub>35</sub> Na) <sub>1</sub> (CH <sub>1</sub> CH <sub>2</sub> COOH) <sub>4</sub> (CH <sub>1</sub> CH <sub>2</sub> COONa) <sub>0</sub>               |
| 1467.4999 | 1467.4254 | 0.0744        | 1 | +3 CH <sub>2</sub> CH <sub>2</sub> COOH + 1 CH <sub>2</sub> CH <sub>2</sub> COONa                | (C <sub>42</sub> H <sub>70</sub> O <sub>35</sub> Na) <sub>1</sub> (CH <sub>1</sub> CH <sub>2</sub> COOH) <sub>3</sub> (CH <sub>1</sub> CH <sub>2</sub> COONa) <sub>1</sub>               |
| 1489.5704 | 1489.4074 | 0.1630        | 1 | +2 CH <sub>2</sub> CH <sub>2</sub> COOH + 2 CH <sub>2</sub> CH <sub>2</sub> COONa                | (C <sub>42</sub> H <sub>70</sub> O <sub>35</sub> Na) <sub>1</sub> (CH <sub>1</sub> CH <sub>2</sub> COOH) <sub>2</sub> (CH <sub>1</sub> CH <sub>2</sub> COONa) <sub>2</sub>               |
| 1511.4588 | 1511.3893 | 0.0694        | 1 | +1 CH <sub>2</sub> CH <sub>2</sub> COOH + 3 CH <sub>2</sub> CH <sub>2</sub> COONa                | (C <sub>42</sub> H <sub>70</sub> O <sub>35</sub> Na) <sub>1</sub> (CH <sub>1</sub> CH <sub>2</sub> COOH) <sub>1</sub> (CH <sub>1</sub> CH <sub>2</sub> COONa) <sub>3</sub>               |

Figure S 17: Peak identification in ESI+ mass spectrum of carboxyethylated  $\beta$ CD (3) prepared in solution (item 8 in Table 1), DS  $\approx$  3.0-3.4

|                        |                      |                      |                                           |                        |                      |
|------------------------|----------------------|----------------------|-------------------------------------------|------------------------|----------------------|
| Acquisition Time (sec) | 3.6438               | Comment              | CE_LJ01A_1H_D2O_281016_2081_rg=80         | Date                   | 28 Oct 2016 11:12:32 |
| Date Stamp             | 28 Oct 2016 11:12:32 | File Name            | E:\doc\!!molecules\Anal\NMR\CE_LJ01\3\fid | Frequency (MHz)        | 300.13               |
| Nucleus                | 1H                   | Number of Transients | 64                                        | Origin                 | spect                |
| Points Count           | 524288               | Pulse Sequence       | zg                                        | Original Points Count  | 16384                |
| Spectrum Offset (Hz)   | 1096.4756            | Spectrum Type        | STANDARD                                  | SW(cyclical) (Hz)      | 4496.40              |
|                        |                      |                      |                                           | Receiver Gain          | 80.60                |
|                        |                      |                      |                                           | Sweep Width (Hz)       | 4496.39              |
|                        |                      |                      |                                           | Temperature (degree C) | 20.660               |

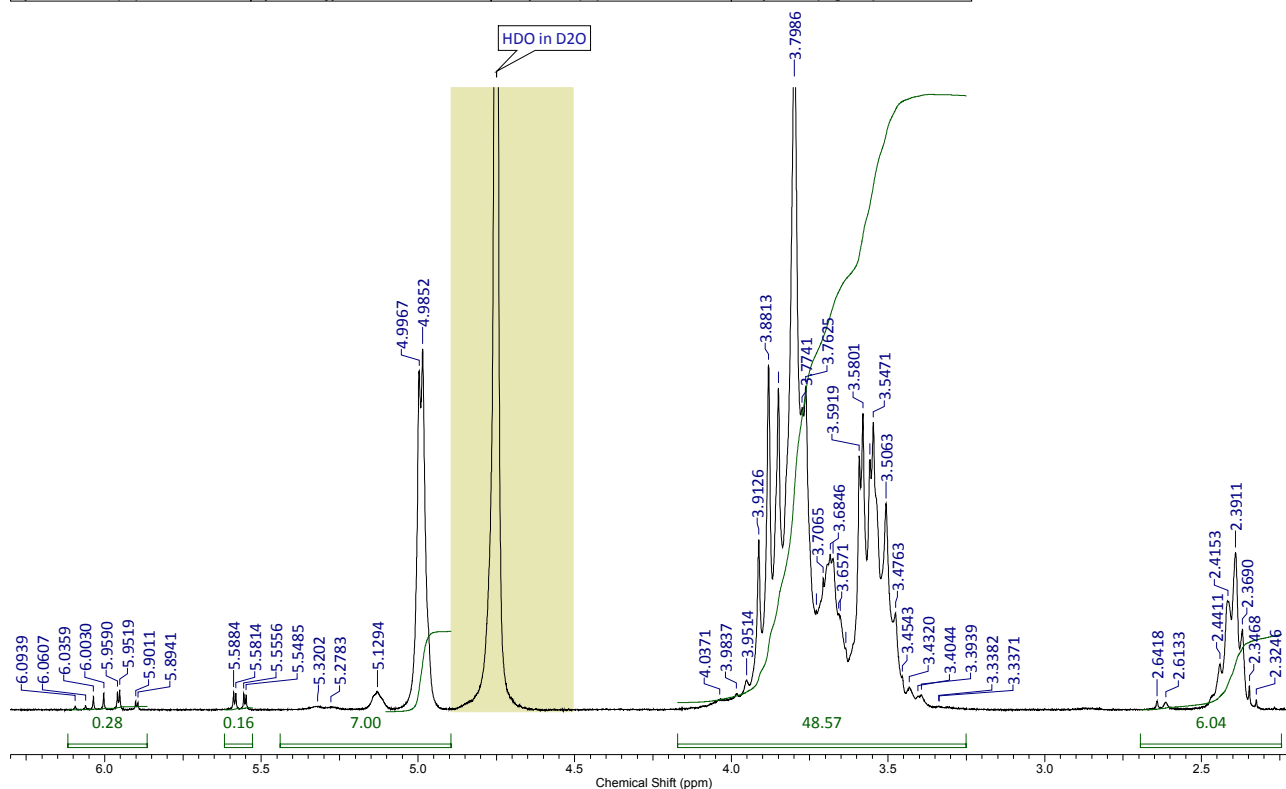

Figure S 18: Proton NMR spectrum of carboxyethylated  $\beta$ CD (3') prepared in ball mill (item 5 in Table 1),  $DS \approx 3.0-3.3$

|                        |                                            |                        |                                 |                       |                                     |
|------------------------|--------------------------------------------|------------------------|---------------------------------|-----------------------|-------------------------------------|
| Acquisition Time (sec) | (0.0427, 0.0051)                           | Comment                | 5 mm BBO 1H-BB Z-GRD Z8284/0059 | Date                  | 28 Oct 2016 11:06:14                |
| File Name              | E:\doc\!!molecules\Anal\NMR\CE_LJ01\4\user | Frequency (MHz)        | (300.13, 75.47)                 | Nucleus               | (1H, 13C)                           |
| Number of Transients   | 32                                         | Origin                 | spect                           | Original Points Count | (128, 64)                           |
| Points Count           | (4096, 128)                                | Pulse Sequence         | hsqcetgqp                       | Solvent               | DMSO                                |
| Sweep Width (Hz)       | (2996.87, 12402.34)                        | Temperature (degree C) | 20.660                          | Spectrum Type         | HSQC-DEPT                           |
|                        |                                            |                        |                                 | Title                 | CE_LJ01A_HSQC_D2O_281016_2081_rg=80 |

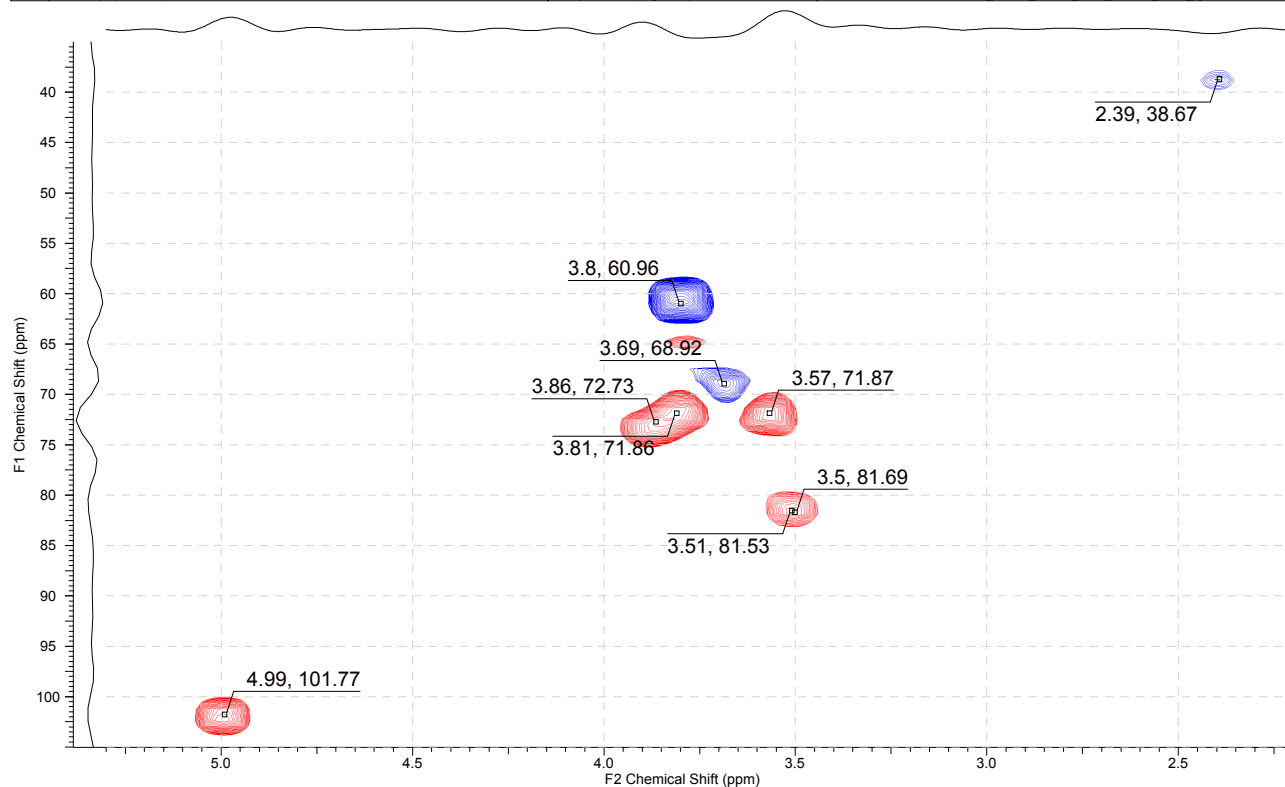

Figure S 19: HSQC-DEPT spectrum of carboxyethylated  $\beta$ CD (3') prepared in ball mill (item 5 in Table 1),  $DS \approx 3.0-3.3$

|                        |                      |                      |                                           |                        |                      |
|------------------------|----------------------|----------------------|-------------------------------------------|------------------------|----------------------|
| Acquisition Time (sec) | 3.6438               | Comment              | CE_LJ02A_1H_D2O_261016_2079_rg=80         | Date                   | 26 Oct 2016 11:46:40 |
| Date Stamp             | 26 Oct 2016 11:46:40 | File Name            | E:\doc\1\molecules\Anal\NMR\CE_LJ02\3\fid | Frequency (MHz)        | 300.13               |
| Nucleus                | 1H                   | Number of Transients | 64                                        | Origin                 | spect                |
| Points Count           | 524288               | Pulse Sequence       | zg                                        | Original Points Count  | 16384                |
| Spectrum Offset (Hz)   | 1096.3091            | Spectrum Type        | STANDARD                                  | SW(cyclical) (Hz)      | 4496.40              |
|                        |                      |                      |                                           | Receiver Gain          | 90.50                |
|                        |                      |                      |                                           | Sweep Width (Hz)       | 4496.39              |
|                        |                      |                      |                                           | Temperature (degree C) | 20.460               |

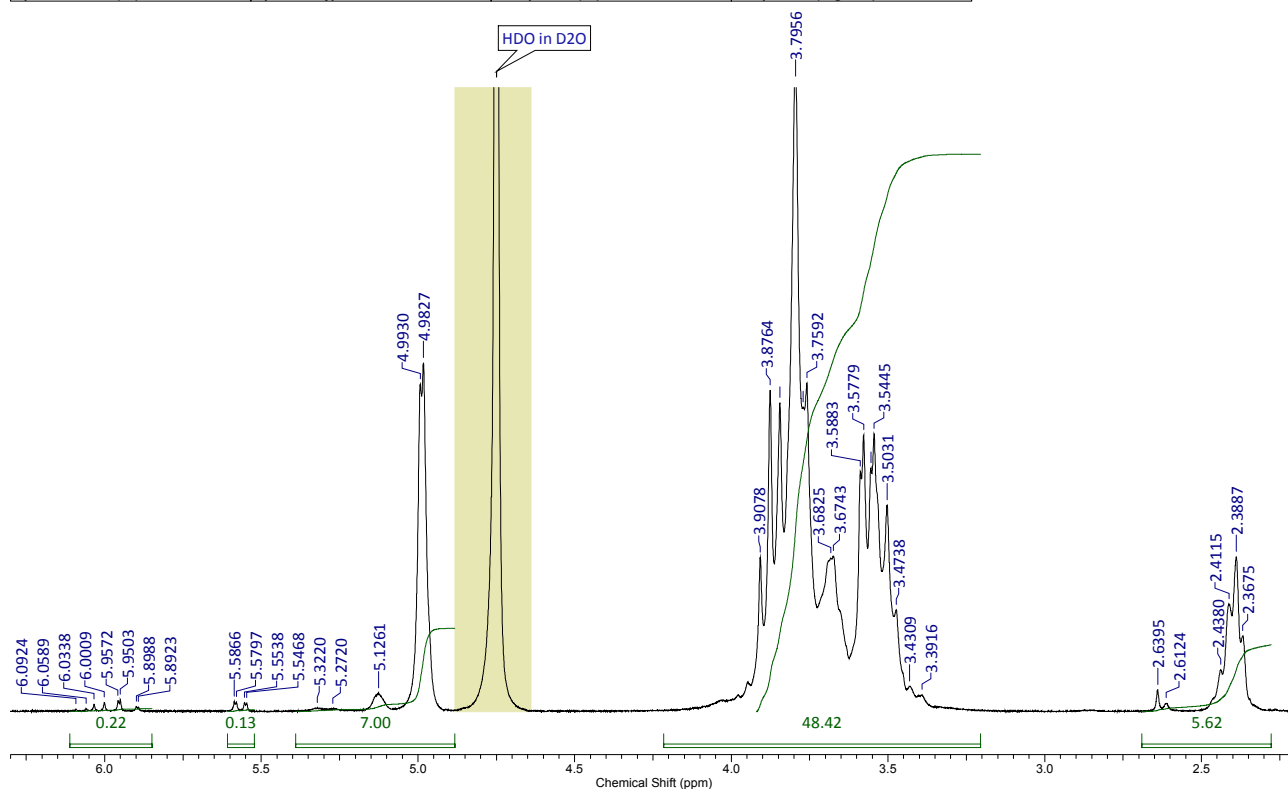

Figure S 20: Proton NMR spectrum of carboxyethylated  $\beta$ CD (3') prepared in ball mill (item 6 in Table 1),  $DS \approx 2.8-3.2$

|                        |                                            |                        |                                 |                       |                                     |
|------------------------|--------------------------------------------|------------------------|---------------------------------|-----------------------|-------------------------------------|
| Acquisition Time (sec) | (0.0427, 0.0051)                           | Comment                | 5 mm BBO 1H-BB Z-GRD Z8284/0059 | Date                  | 26 Oct 2016 11:40:52                |
| File Name              | E:\doc\1\molecules\Anal\NMR\CE_LJ02\4\user | Frequency (MHz)        | (300.13, 75.47)                 | Nucleus               | (1H, 13C)                           |
| Number of Transients   | 32                                         | Origin                 | spect                           | Original Points Count | (128, 64)                           |
| Points Count           | (256, 512)                                 | Pulse Sequence         | hsqcetdgp                       | Solvent               | DMSO                                |
| Sweep Width (Hz)       | (2885.89, 12475.59)                        | Temperature (degree C) | 20.560                          | Spectrum Type         | HSQC-DEPT                           |
|                        |                                            |                        |                                 | Title                 | CE_LJ02A_HSQC_D2O_261016_2079_rg=80 |

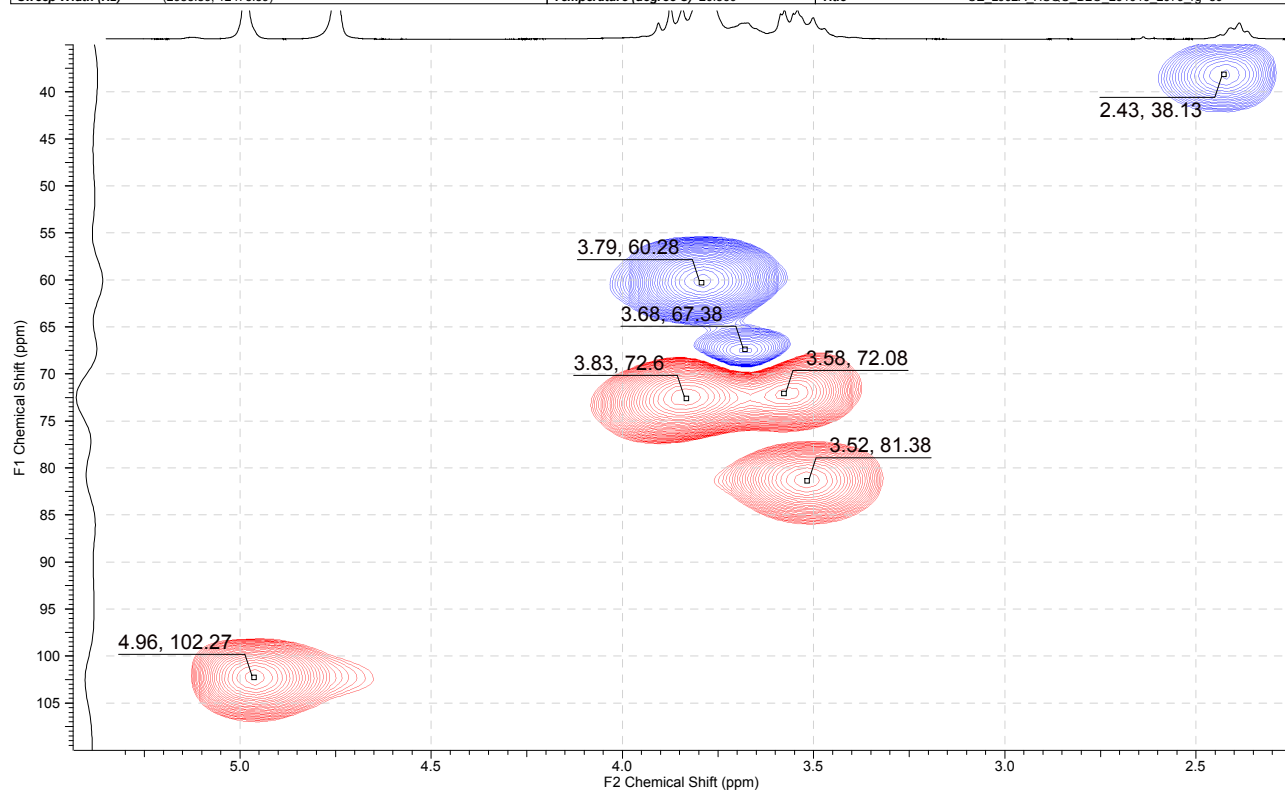

Figure S 21: HSQC-DEPT spectrum of carboxyethylated  $\beta$ CD (3') prepared in ball mill (item 6 in Table 1),  $DS \approx 2.8-3.2$

|                        |                      |                      |                                            |                        |                      |
|------------------------|----------------------|----------------------|--------------------------------------------|------------------------|----------------------|
| Acquisition Time (sec) | 3.6438               | Comment              | CE_LJ03B_1H_D2O_281016_2082_rg=60          | Date                   | 28 Oct 2016 13:41:52 |
| Date Stamp             | 28 Oct 2016 13:41:52 | File Name            | E:\doc\1\molecules\Anal\NMR\ICE_LJ03\3\fid | Frequency (MHz)        | 300.13               |
| Nucleus                | 1H                   | Number of Transients | 64                                         | Origin                 | spect                |
| Points Count           | 524288               | Pulse Sequence       | zg                                         | Original Points Count  | 16384                |
| Spectrum Offset (Hz)   | 1096.4291            | Spectrum Type        | STANDARD                                   | Receiver Gain          | 64.00                |
|                        |                      |                      |                                            | SW(cyclical) (Hz)      | 4496.40              |
|                        |                      |                      |                                            | Solvent                | CDCl3                |
|                        |                      |                      |                                            | Sweep Width (Hz)       | 4496.39              |
|                        |                      |                      |                                            | Temperature (degree C) | 20.660               |

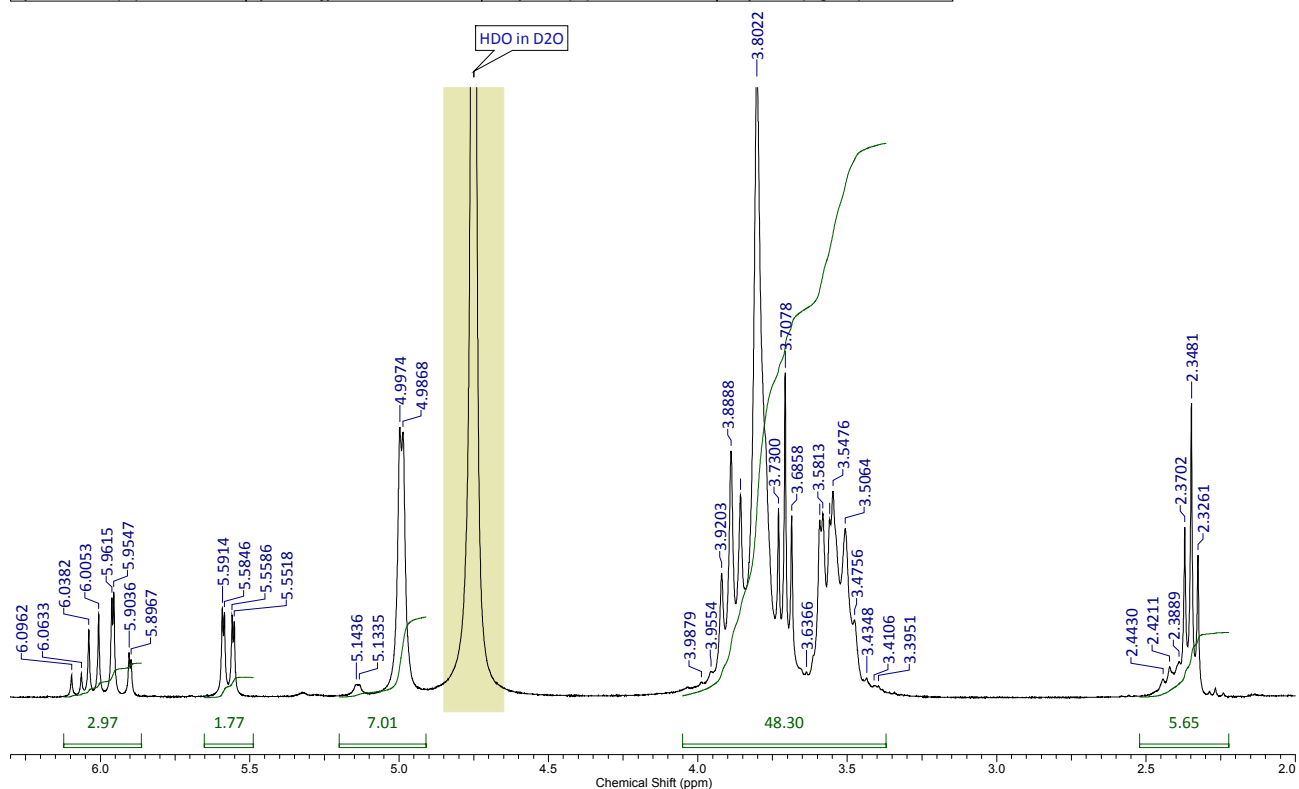

Figure S 22: Proton NMR spectrum of carboxyethylated  $\beta$ CD (3') prepared in ball mill (item 7 in Table 1),  $DS \approx 2.8-3.1$

|                        |                                             |                        |                                 |                       |                                     |
|------------------------|---------------------------------------------|------------------------|---------------------------------|-----------------------|-------------------------------------|
| Acquisition Time (sec) | (0.0427, 0.0051)                            | Comment                | 5 mm BBO 1H-BB Z-GRD Z8284/0059 | Date                  | 28 Oct 2016 13:36:38                |
| File Name              | E:\doc\1\molecules\Anal\NMR\ICE_LJ03\4\iser | Frequency (MHz)        | (300.13, 75.47)                 | Nucleus               | (1H, 13C)                           |
| Number of Transients   | 32                                          | Origin                 | spect                           | Original Points Count | (128, 64)                           |
| Points Count           | (2048, 8192)                                | Pulse Sequence         | hsqcetdgp                       | Solvent               | DMSO                                |
| Sweep Width (Hz)       | (2996.14, 12498.47)                         | Temperature (degree C) | 20.760                          | Spectrum Type         | HSQC-DEPT                           |
|                        |                                             |                        |                                 | Title                 | CE_LJ03B_HSQC_D2O_281016_2082_rg=60 |

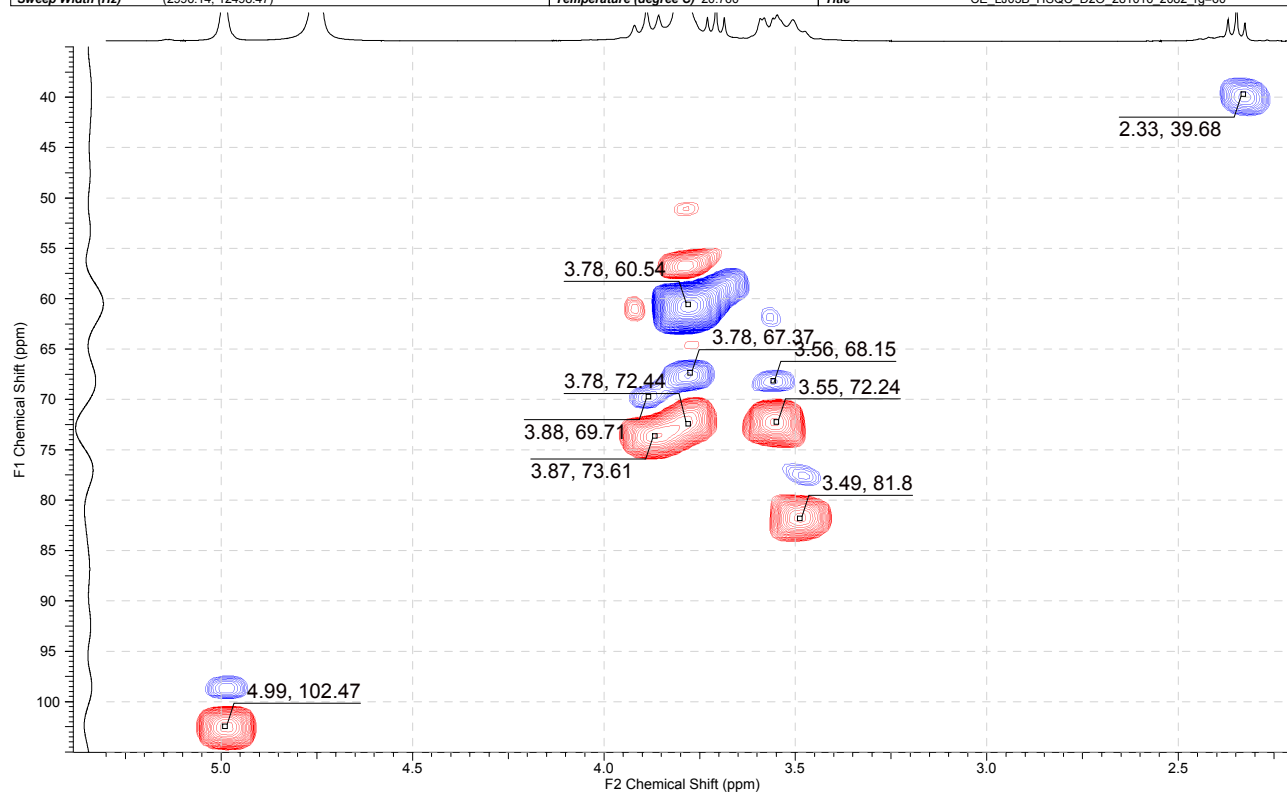

Figure S 23: HSQC-DEPT spectrum of carboxyethylated  $\beta$ CD (3') prepared in ball mill (item 7 in Table 1),  $DS \approx 2.8-3.1$



|                  |                                                        |                       |                                |                        |                      |
|------------------|--------------------------------------------------------|-----------------------|--------------------------------|------------------------|----------------------|
| <b>Title</b>     | CEBCD_LJ00sol_H                                        | <b>Origin</b>         | Exported PE Spectrum Data File | <b>Owner</b>           | Admin                |
| <b>File Name</b> | E:\DOCUMENTS\1\MOLECULES\ANAL\IR2\S\CEBCD_LJ00SOL_H.DX | <b>Date Stamp</b>     | 17/01/20 13:14:56.00           | <b>Date</b>            | 27 Jan 2017 16:14:32 |
| <b>Technique</b> | Infrared                                               | <b>Instrument</b>     | PERKIN-ELMER 1005 IR           | <b>Spectral Region</b> | IR                   |
| <b>Y Axis</b>    | Transmittance                                          | <b>Spectrum Range</b> | 400.2000 - 3999.2361           | <b>Points Count</b>    | 3733                 |
|                  |                                                        | <b>Data Spacing</b>   | 0.9644                         | <b>X Axis</b>          | Wavenumber (cm-1)    |

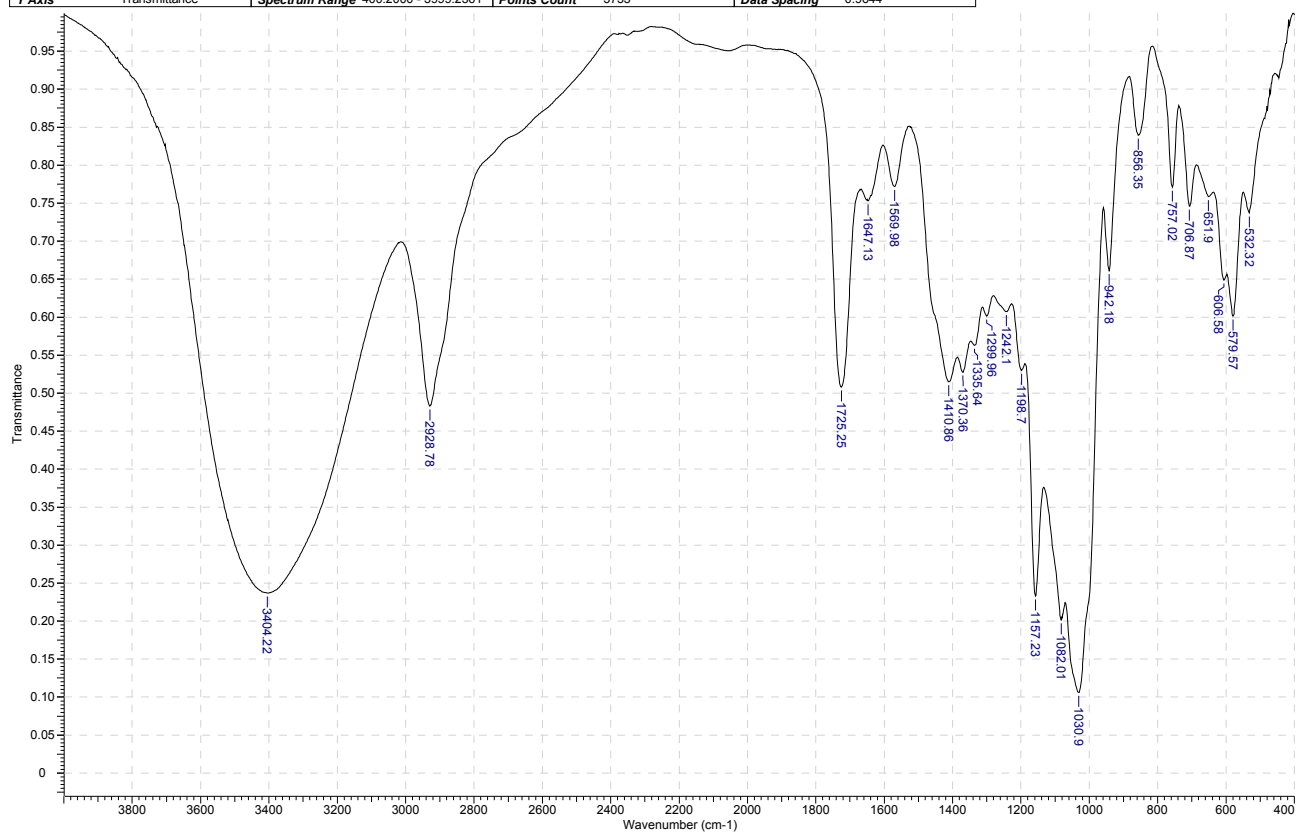

Figure S 24: IR spectrum of carboxylethylated  $\beta$ CD (3) prepared in solution (item 8 in Table 1) as acid, DS  $\approx$  3.0-3.4

|                       |                      |                     |                                                          |                        |                     |
|-----------------------|----------------------|---------------------|----------------------------------------------------------|------------------------|---------------------|
| <b>Comment</b>        | CEBCD_LJ00sol_Na     | <b>File Name</b>    | E:\DOCUMENTS\1\MOLECULES\ANAL\IR2\S\CEBCD_LJ00SOL_NA.SPC | <b>Date Stamp</b>      | 27/01/2017 13:01:00 |
| <b>Date</b>           | 20 Jan 2017 13:01:00 | <b>Technique</b>    | Infrared                                                 | <b>Spectral Region</b> | IR                  |
| <b>Spectrum Range</b> | 400.2250 - 3999.2360 | <b>Points Count</b> | 3733                                                     | <b>Data Spacing</b>    | 0.9644              |
|                       |                      |                     |                                                          | <b>X Axis</b>          | Wavenumber (cm-1)   |
|                       |                      |                     |                                                          | <b>Y Axis</b>          | Transmittance       |

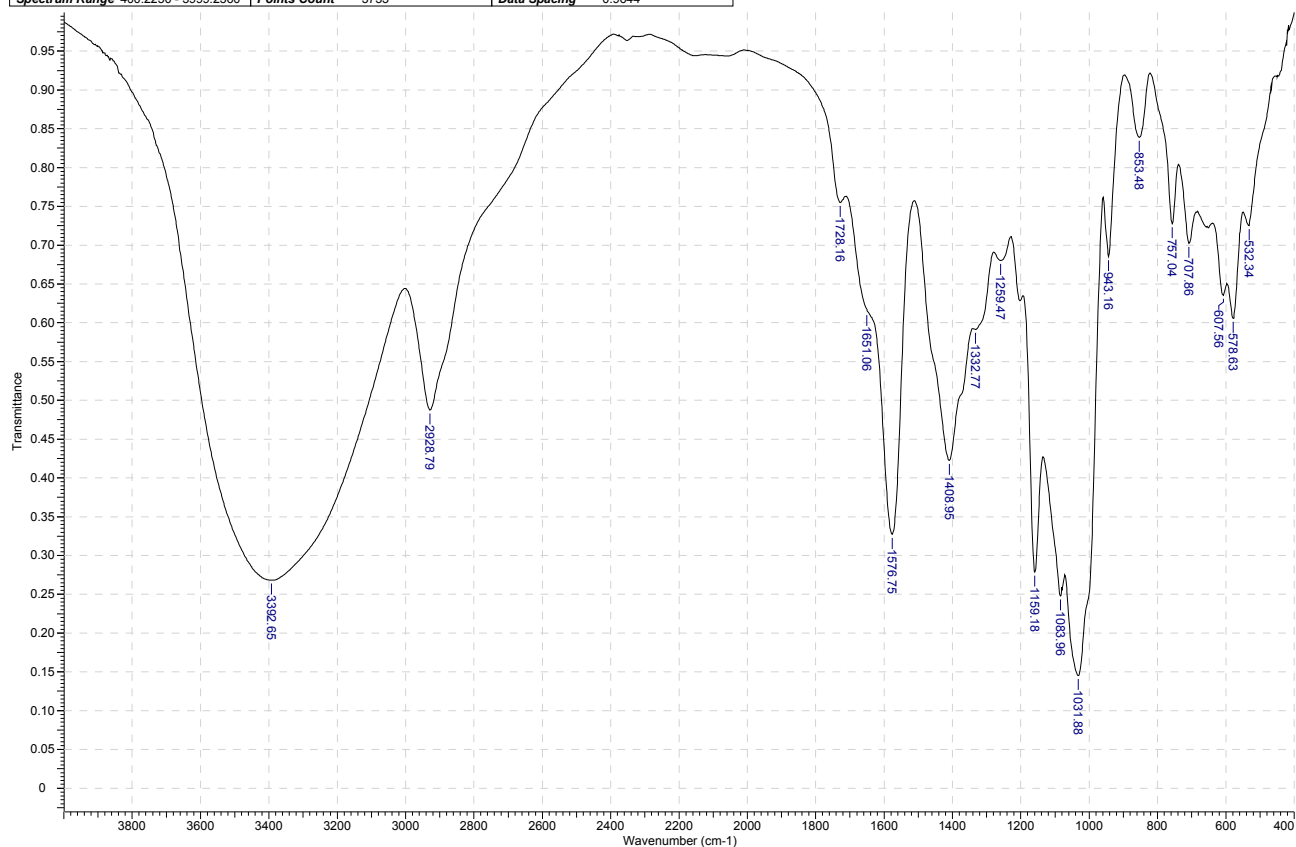

Figure S 25: IR spectrum of carboxylethylated  $\beta$ CD (3) prepared in solution (item 8 in Table 1) as sodium salt, DS  $\approx$  3.0-3.4

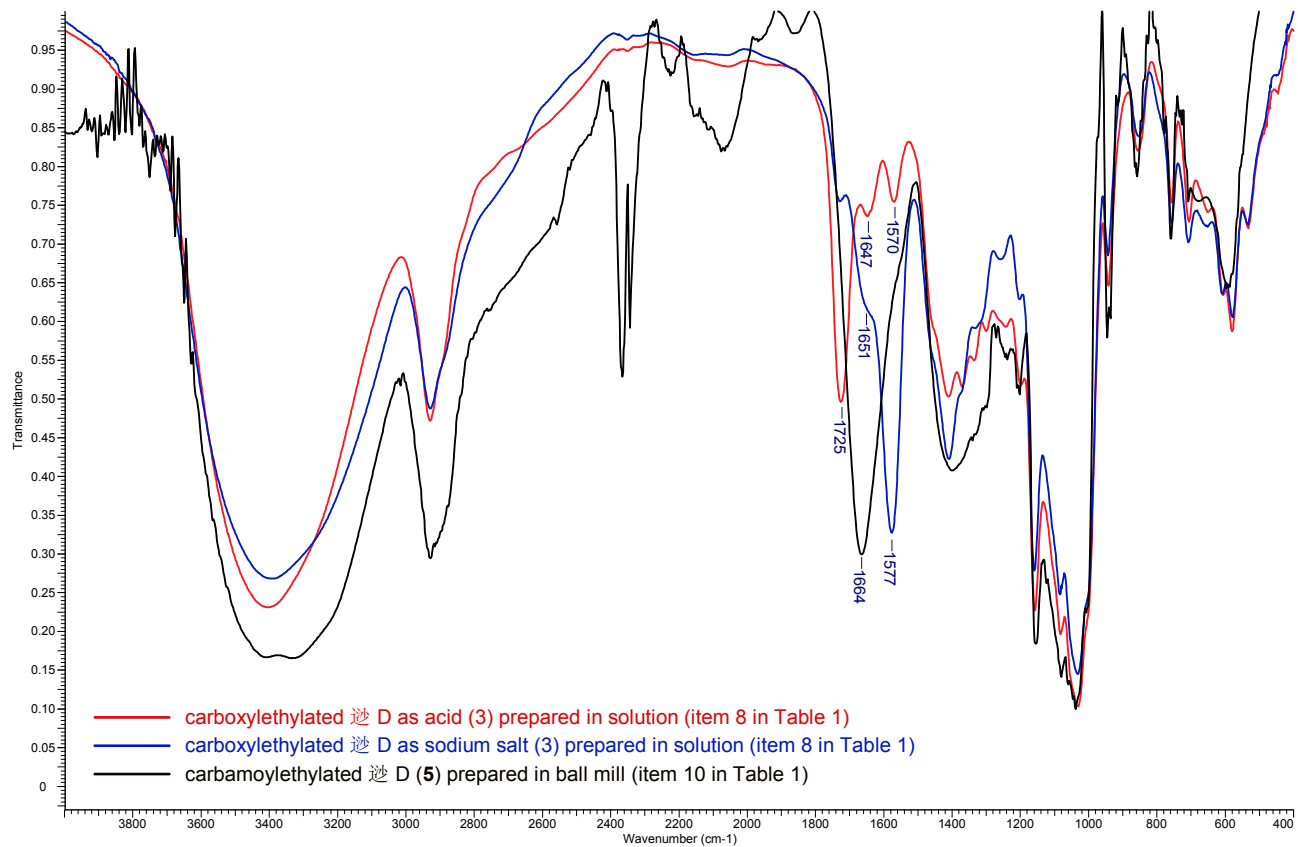

Figure S 26: Overlay of IR spectrum of carboxylethylated  $\beta$ CD acid & salt form (3) prepared in solution (item 8 in Table 1), DS  $\approx$  3.0-3.4 and carbamoylethylated  $\beta$ CD prepared in ball mill (item 10 in table 1)

|                        |                      |                      |                                                      |                  |                 |                        |         |
|------------------------|----------------------|----------------------|------------------------------------------------------|------------------|-----------------|------------------------|---------|
| Acquisition Time (sec) | 3.6438               | Comment              | CAMBCD_LJ01w (30 mg in 0.6ml D2O)_19102016_1H_RG=180 |                  | Date            | 19 Oct 2016 11:40:16   |         |
| Date Stamp             | 19 Oct 2016 11:40:16 | File Name            | E:\doc\1\molecules\Anal\NMR\CAMBCD_LJ01\7fid         |                  | Frequency (MHz) | 300.13                 |         |
| Nucleus                | 1H                   | Number of Transients | 64                                                   | Origin           | spect           | Original Points Count  | 16384   |
| Points Count           | 262144               | Pulse Sequence       | zg                                                   | Receiver Gain    | 181.00          | SW(cyclical) (Hz)      | 4496.40 |
| Spectrum Offset (Hz)   | 1096.5278            | Spectrum Type        | STANDARD                                             | Sweep Width (Hz) | 4496.39         | Temperature (degree C) | 20.860  |

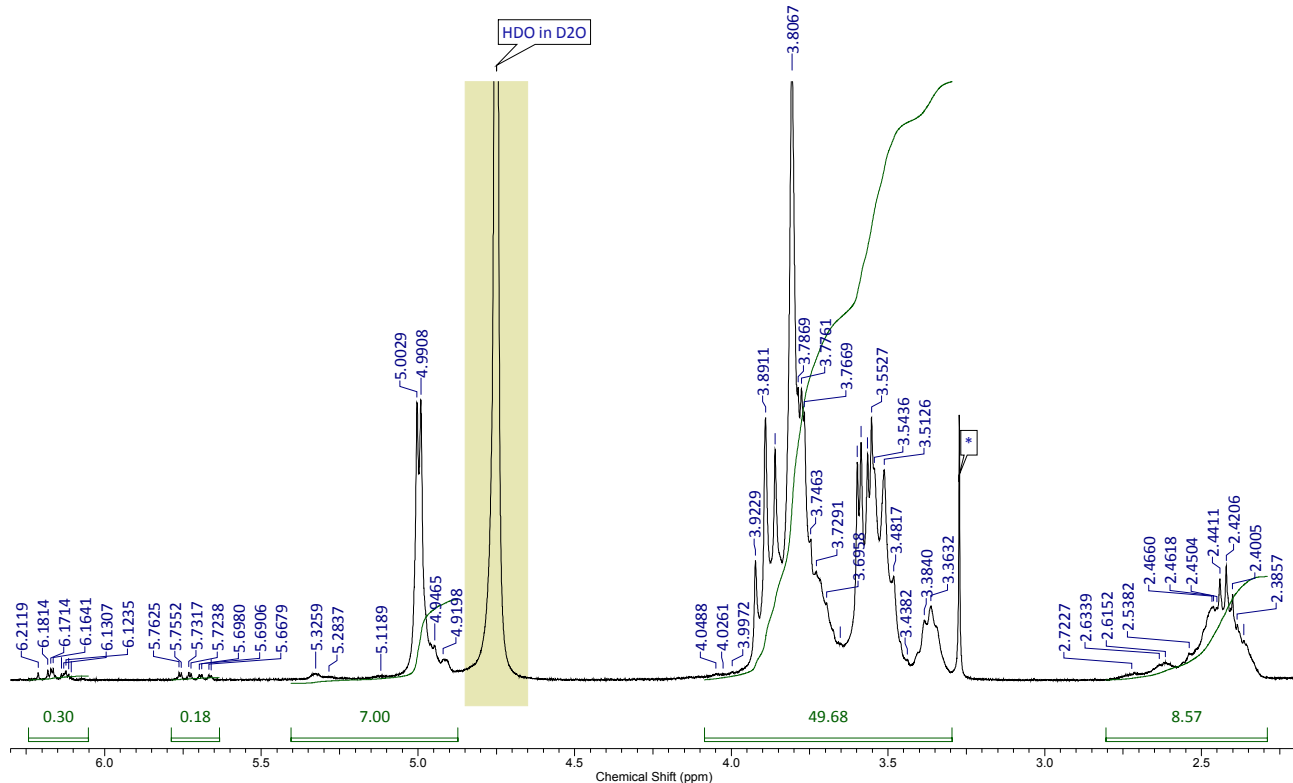

Figure S 27: Proton NMR spectrum of carbamoylethylated  $\beta$ CD (5) prepared in ball mill (item 9 in Table 1),  $DS \approx 3.8-4.3$

|                        |                                                |                        |                                 |                       |                                                 |                      |           |
|------------------------|------------------------------------------------|------------------------|---------------------------------|-----------------------|-------------------------------------------------|----------------------|-----------|
| Acquisition Time (sec) | (0.0427, 0.0051)                               | Comment                | 5 mm BBO 1H-BB Z-GRD Z8284/0059 |                       | Date                                            | 19 Oct 2016 11:34:02 |           |
| File Name              | E:\doc\1\molecules\Anal\NMR\CAMBCD_LJ01\8\user | Frequency (MHz)        | (300.13, 75.47)                 | Nucleus               | (1H, 13C)                                       |                      |           |
| Number of Transients   | 32                                             | Origin                 | spect                           | Original Points Count | (128, 64)                                       | Owner                | psm       |
| Points Count           | (256, 256)                                     | Pulse Sequence         | hsqcetlap                       | Solvent               | DMSO                                            | Spectrum Type        | HSQC-DEPT |
| Sweep Width (Hz)       | (2985.89, 12451.17)                            | Temperature (degree C) | 20.960                          | Title                 | CAMBCD_LJ01w (30 mg in 0.6ml D2O)_19102016_HSQC |                      |           |

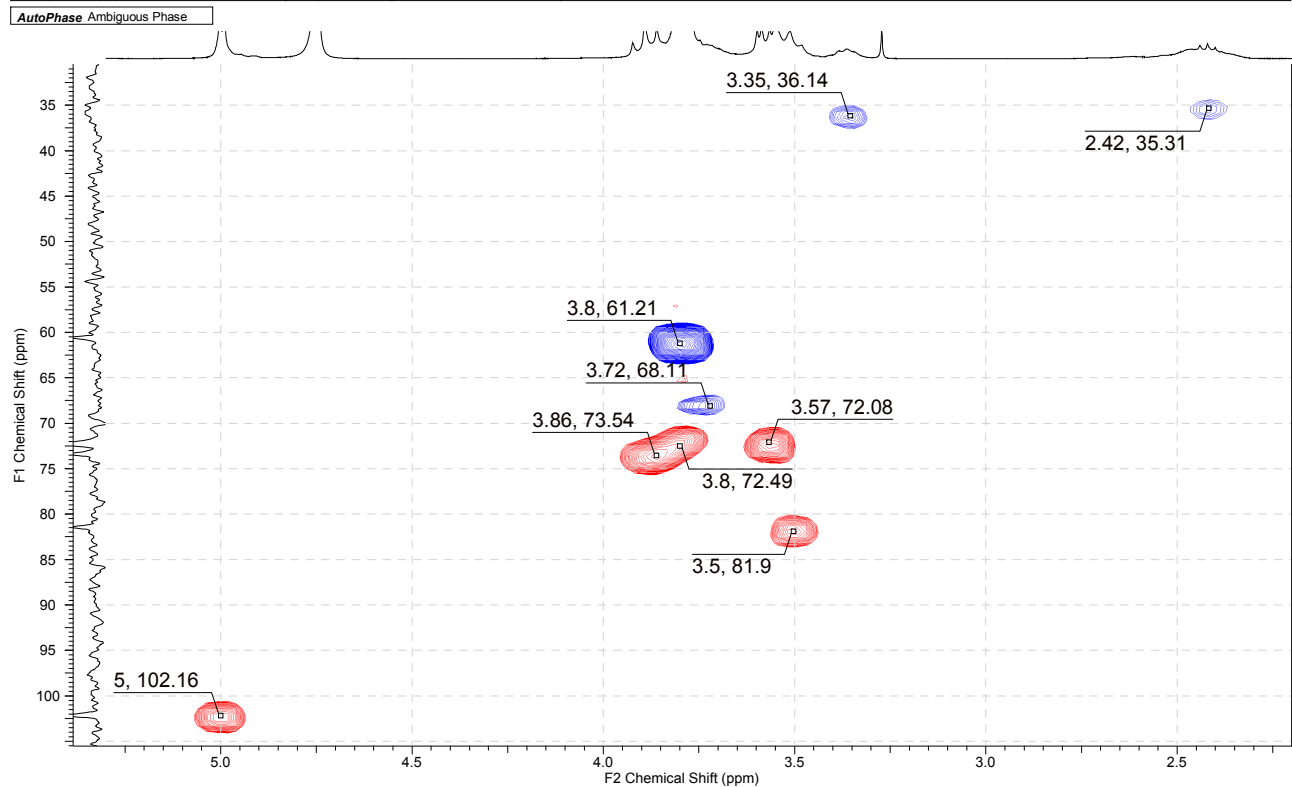

Figure S 28: HSQC-DEPT spectrum of carbamoylethylated  $\beta$ CD (5) prepared in ball mill (item 9 in Table 1),  $DS \approx 3.8-4.3$

|                        |                      |                      |                                               |                      |                      |                       |          |
|------------------------|----------------------|----------------------|-----------------------------------------------|----------------------|----------------------|-----------------------|----------|
| Acquisition Time (sec) | 1.8088               | Comment              | CAM1bCD_LJ01 in 700ul D2O                     | Date                 | 20 Jan 2017 13:01:04 |                       |          |
| Date Stamp             | 20 Jan 2017 13:01:04 | File Name            | E:\Documents\Anal\CarbonNMR\CAM1bCD_LJ01\1fid |                      |                      |                       |          |
| Frequency (MHz)        | 75.47                | Nucleus              | 13C                                           | Number of Transients | 836                  | Original Points Count | 32768    |
| Owner                  | psm                  | Points Count         | 262144                                        | Pulse Sequence       | zgpg.save.txt        | Receiver Gain         | 13004.00 |
| Solvent                | CHLOROFORM-d         | Spectrum Offset (Hz) | 8309.0479                                     | Spectrum Type        | STANDARD             | SW(cyclical) (Hz)     | 18115.94 |
| Temperature (degree C) | 20.760               |                      |                                               |                      |                      | Sweep Width (Hz)      | 18115.87 |

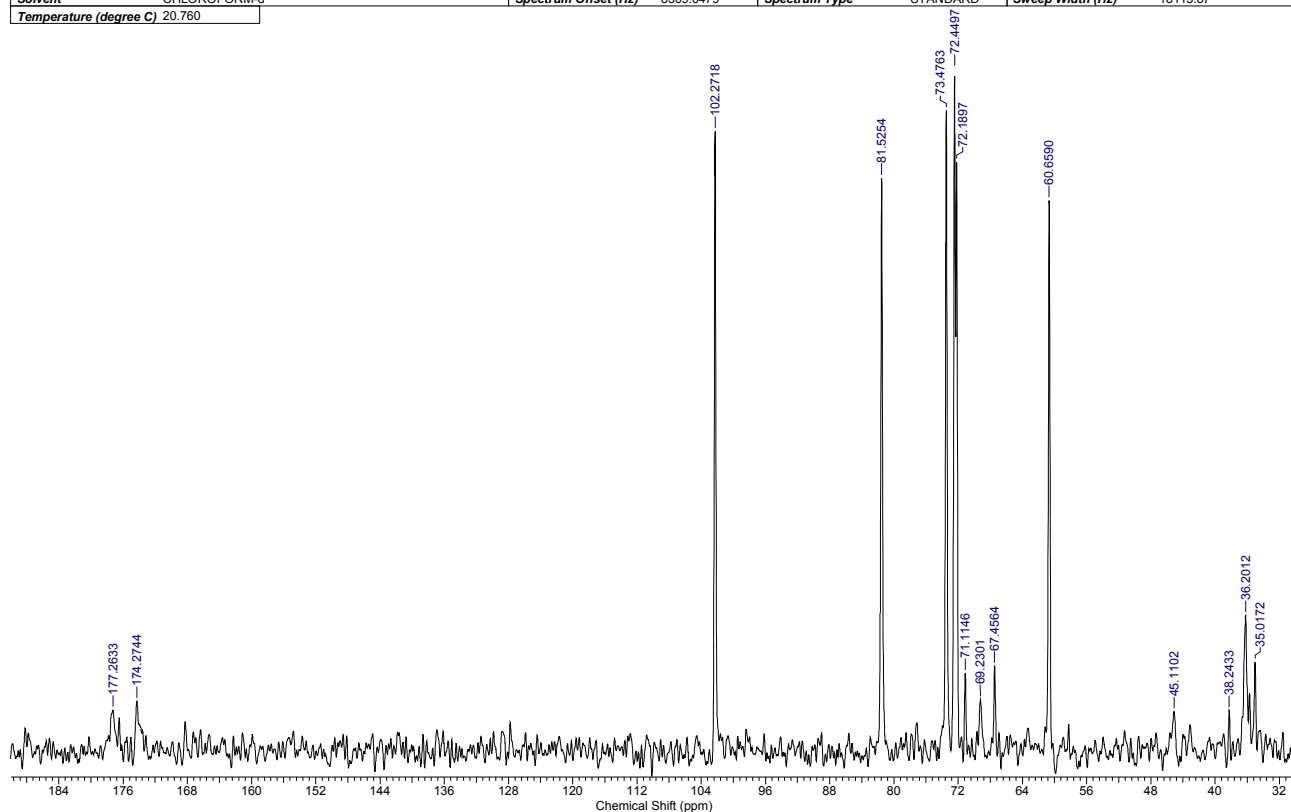

Figure S 29:  $^{13}\text{C}$ -NMR spectrum of carbamoylethylated  $\beta$ CD (**5**) prepared in ball mill (item 9 in Table 1), DS  $\approx$ 3.8-4.3

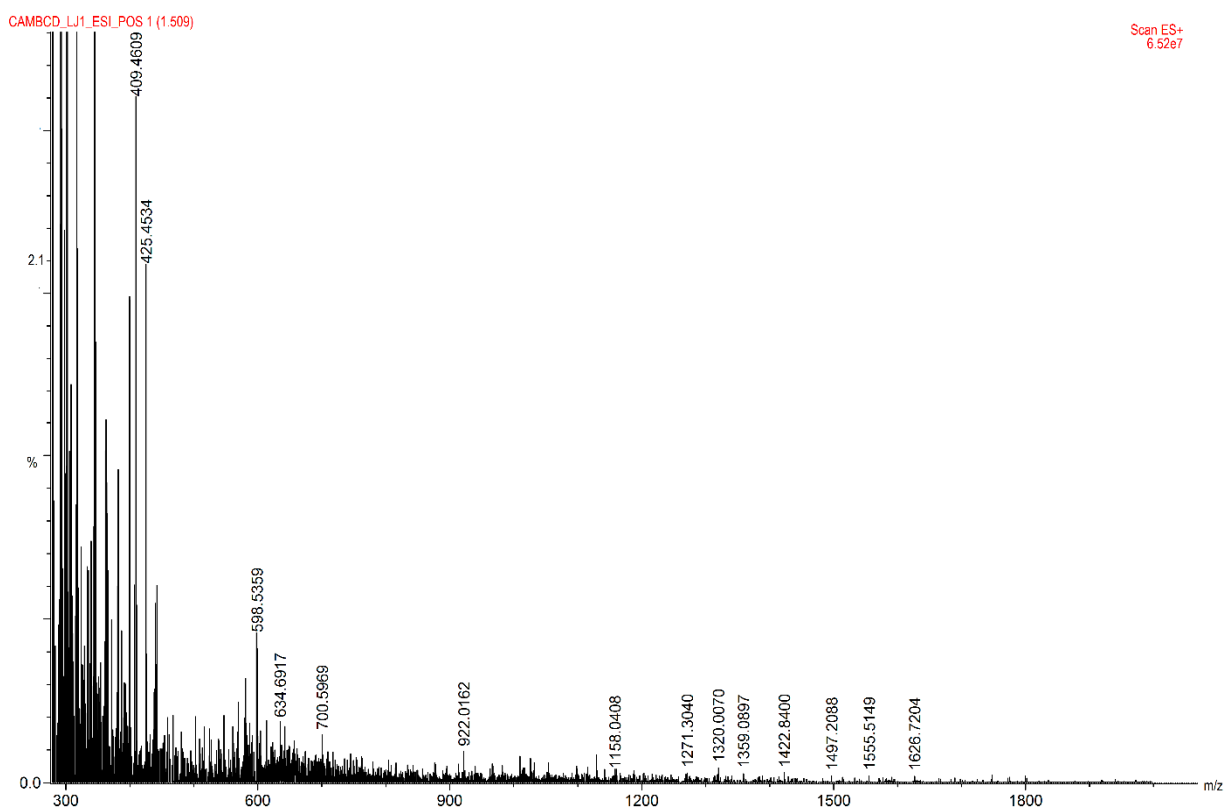

Figure S 30: ESI+ mass spectrum of carbamoylethylated  $\beta$ CD (**5**) prepared in ball mill (item 9 in Table 1), DS  $\approx$ 3.8-4.3

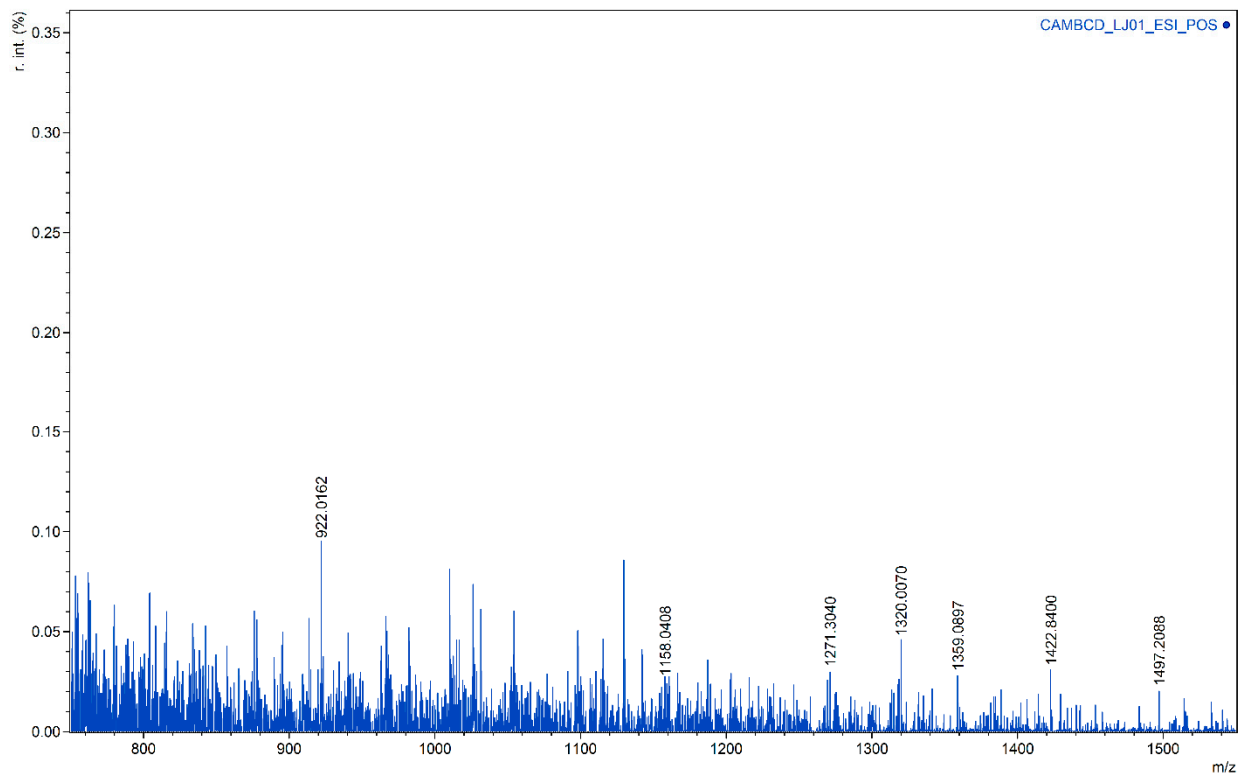

| Meas. m/z | Calc. m/z | $\delta$ (Da) | Z | Annotation                                                                                    | Formula                                                                                                                                                                                                                                                                   |
|-----------|-----------|---------------|---|-----------------------------------------------------------------------------------------------|---------------------------------------------------------------------------------------------------------------------------------------------------------------------------------------------------------------------------------------------------------------------------|
| 634.6917  | 635.0289  | -0.3372       | 2 | +1 CH <sub>2</sub> CH <sub>2</sub> CONH <sub>2</sub> +1 HaO                                   | (C <sub>42</sub> H <sub>70</sub> O <sub>35</sub> Na <sub>2</sub> ) <sub>1</sub> (CH <sub>1</sub> CH <sub>2</sub> CONH <sub>2</sub> ) <sub>1</sub> (CH <sub>1</sub> C <sub>2</sub> CH <sub>2</sub> COOH) <sub>0</sub> (HCOOH) <sub>0</sub> (H <sub>2</sub> O) <sub>1</sub> |
| 642.6066  | 643.7032  | -1.0966       | 2 | +1 CH <sub>2</sub> CH <sub>2</sub> COONH <sub>2</sub>                                         | (C <sub>42</sub> H <sub>70</sub> O <sub>35</sub> Na <sub>2</sub> ) <sub>1</sub> (CH <sub>1</sub> CH <sub>2</sub> CONH <sub>2</sub> ) <sub>1</sub> (CH <sub>1</sub> C <sub>2</sub> CH <sub>2</sub> COOH) <sub>0</sub> (HCOOH) <sub>0</sub> (H <sub>2</sub> O) <sub>2</sub> |
| 700.5969  | 700.2153  | 0.3816        | 2 | +2 CH <sub>2</sub> CH <sub>2</sub> CONH <sub>2</sub> +1 CH <sub>2</sub> CH <sub>2</sub> COONa | (C <sub>42</sub> H <sub>70</sub> O <sub>35</sub> Na <sub>2</sub> ) <sub>1</sub> (CH <sub>1</sub> CH <sub>2</sub> CONH <sub>2</sub> ) <sub>2</sub> (CH <sub>1</sub> CH <sub>2</sub> CONa) <sub>1</sub>                                                                     |
| 922.0162  | 923.7832  | -1.7670       | 2 | +5 CH <sub>2</sub> CH <sub>2</sub> CONH <sub>2</sub> +4 CH <sub>2</sub> HC <sub>2</sub> COONa | (C <sub>42</sub> H <sub>70</sub> O <sub>35</sub> Na <sub>2</sub> ) <sub>1</sub> (CH <sub>1</sub> CH <sub>2</sub> CONH <sub>2</sub> ) <sub>5</sub> (CH <sub>1</sub> CH <sub>2</sub> CONa) <sub>4</sub>                                                                     |
| 1158.0408 | 1157.3590 | 0.6819        | 1 | C <sub>42</sub> H <sub>70</sub> O <sub>35</sub> (bCD)                                         | C <sub>42</sub> H <sub>70</sub> O <sub>35</sub> Na                                                                                                                                                                                                                        |
| 1271.3040 | 1271.3907 | -0.0867       | 1 | +1 CH <sub>2</sub> CH <sub>2</sub> COOH +1 H <sub>2</sub> O                                   | (C <sub>42</sub> H <sub>70</sub> O <sub>35</sub> Na) <sub>1</sub> (CH <sub>1</sub> CH <sub>2</sub> CONH <sub>2</sub> ) <sub>0</sub> (CH <sub>1</sub> C <sub>2</sub> CH <sub>2</sub> COOH) <sub>1</sub> (HCOOH) <sub>0</sub> (H <sub>2</sub> O) <sub>1</sub>               |

Figure S 31: Peak identification in ESI+ mass spectrum of carbamoylethylated  $\beta$ CD (**5**) prepared in ball mill (item 9 in Table 1), DS  $\approx$ 3.8-4.3

|                        |                      |                      |                                               |                        |                      |
|------------------------|----------------------|----------------------|-----------------------------------------------|------------------------|----------------------|
| Acquisition Time (sec) | 3.6438               | Comment              | CAMBCD_LJ02_1H_D2O_31102016                   | Date                   | 31 Oct 2016 11:33:36 |
| Date Stamp             | 31 Oct 2016 11:33:36 | File Name            | E:\doc\1\molecules\Anal\NMR\CAMBCD_LJ02\1\fid | Frequency (MHz)        | 300.13               |
| Nucleus                | 1H                   | Number of Transients | 64                                            | Origin                 | spect                |
| Points Count           | 524288               | Pulse Sequence       | zg                                            | Receiver Gain          | 143.70               |
| Spectrum Offset (Hz)   | 1096.9557            | Spectrum Type        | STANDARD                                      | SW(cyclical) (Hz)      | 4496.40              |
|                        |                      |                      |                                               | Temperature (degree C) | 19.960               |
|                        |                      |                      |                                               | Owner                  | root                 |
|                        |                      |                      |                                               | Solvent                | DEUTERIUM OXIDE      |

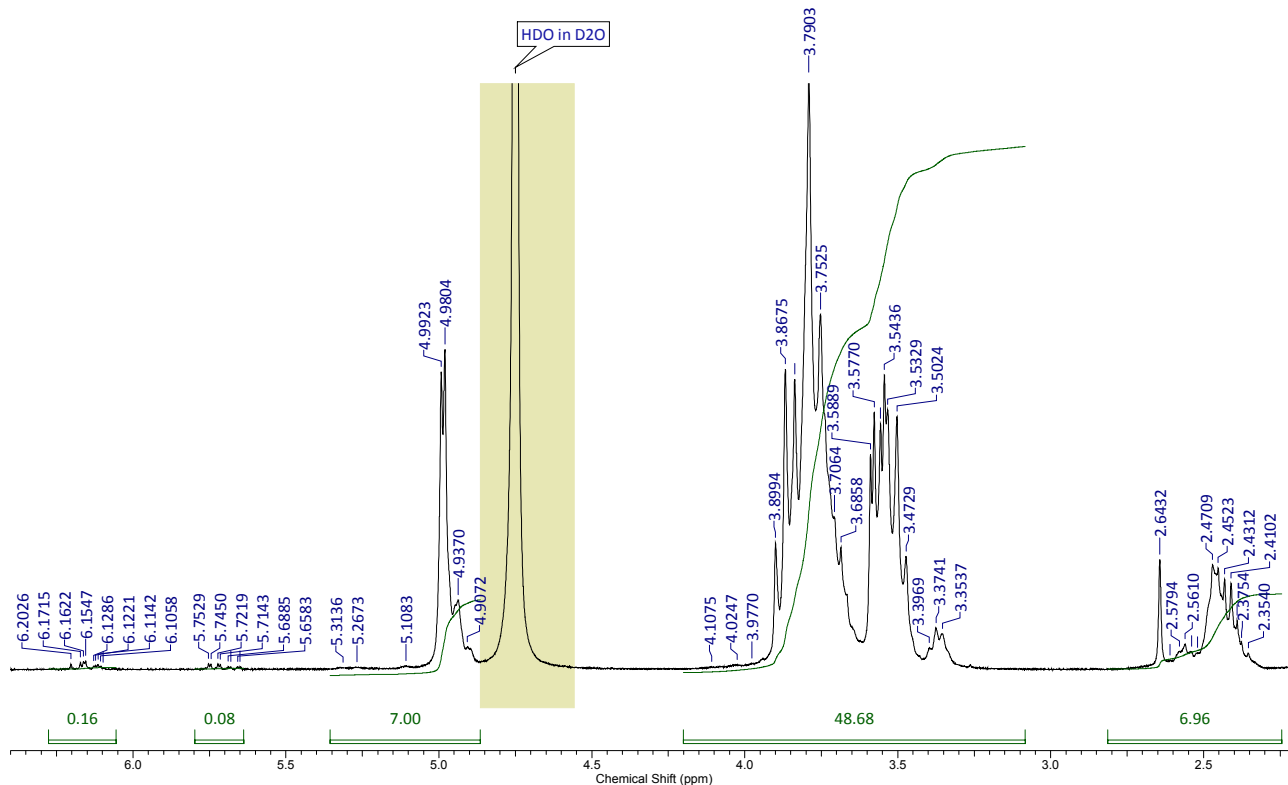

Figure S 32: Proton NMR spectrum of carbamoylethylated  $\beta$ CD (5) prepared in ball mill (item 10 in Table 1), DS  $\approx$ 3.3-3.5

|                        |                                                |                        |                                 |                       |                               |
|------------------------|------------------------------------------------|------------------------|---------------------------------|-----------------------|-------------------------------|
| Acquisition Time (sec) | (0.0427, 0.0051)                               | Comment                | 5 mm BBO 1H-BB Z-GRD Z8284/0059 | Date                  | 31 Oct 2016 12:28:08          |
| File Name              | E:\doc\1\molecules\Anal\NMR\CAMBCD_LJ02\2\user | Frequency (MHz)        | (300.13, 75.47)                 | Nucleus               | (1H, 13C)                     |
| Number of Transients   | 32                                             | Origin                 | spect                           | Original Points Count | (128, 64)                     |
| Points Count           | (256, 1024)                                    | Pulse Sequence         | hsgcedetgp                      | Solvent               | DMSO                          |
| Sweep Width (Hz)       | (2985.89, 12487.79)                            | Temperature (degree C) | 20.060                          | Spectrum Type         | HSQC-DEPT                     |
|                        |                                                |                        |                                 | Title                 | CAMBCD_LJ02_HSQC_D2O_31102016 |

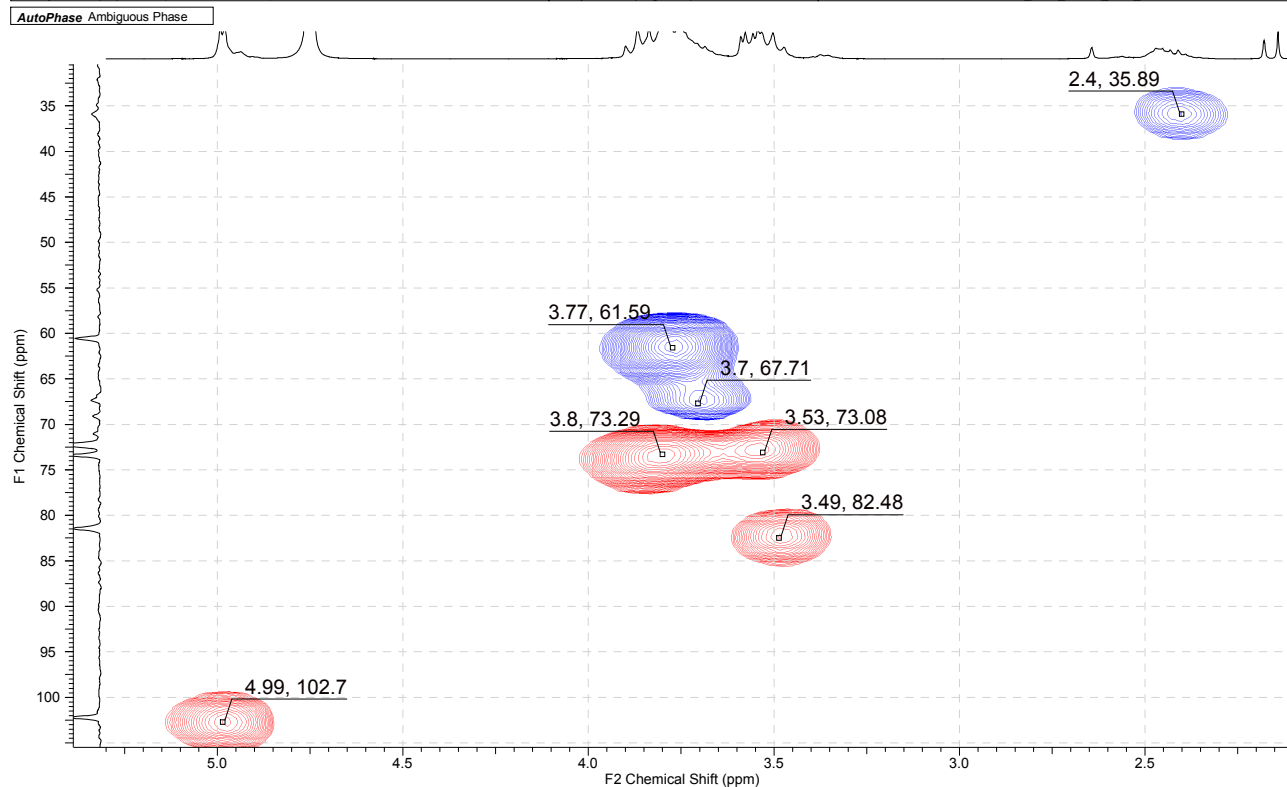

Figure S 33: HSQC-DEPT spectrum of carbamoylethylated  $\beta$ CD (5) prepared in ball mill (item 10 in Table 1), DS  $\approx$ 3.3-3.5

|                        |                      |                      |                                                |                        |                      |
|------------------------|----------------------|----------------------|------------------------------------------------|------------------------|----------------------|
| Acquisition Time (sec) | 1.8088               | Comment              | CAMBCD_LJ02_13C_D2O_03112016_2086_notte        | Date                   | 03 Nov 2016 13:45:52 |
| Date Stamp             | 03 Nov 2016 13:45:52 | File Name            | E:\doc\11\molecules\Anal\NMR\CAMBCD_LJ02\3\fid | Frequency (MHz)        | 75.47                |
| Nucleus                | 13C                  | Number of Transients | 1035                                           | Origin                 | spect                |
| Points Count           | 262144               | Pulse Sequence       | zpgpg.save.bt                                  | Original Points Count  | 32768                |
| Spectrum Offset (Hz)   | 8301.4463            | Receiver Gain        | 4597.60                                        | SW(cyclical) (Hz)      | 18115.94             |
|                        |                      | Spectrum Type        | STANDARD                                       | Solvent                | DMSO-d6              |
|                        |                      | Sweep Width (Hz)     | 18115.87                                       | Temperature (degree C) | 21.360               |

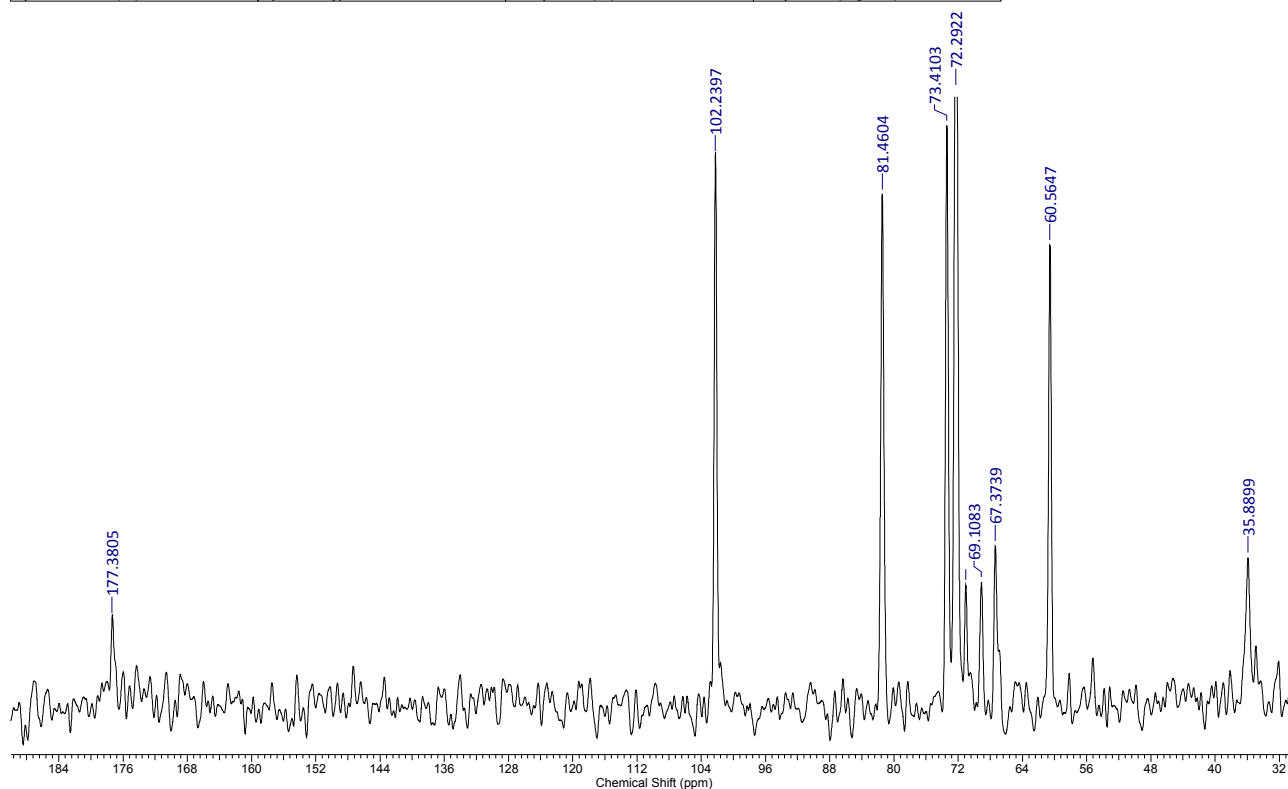

Figure S 34:  $^{13}\text{C}$ -NMR spectrum of carbamoylethylated  $\beta\text{CD}$  (**5**) prepared in ball mill (item 10 in Table 1),  $\text{DS} \approx 3.3\text{-}3.5$

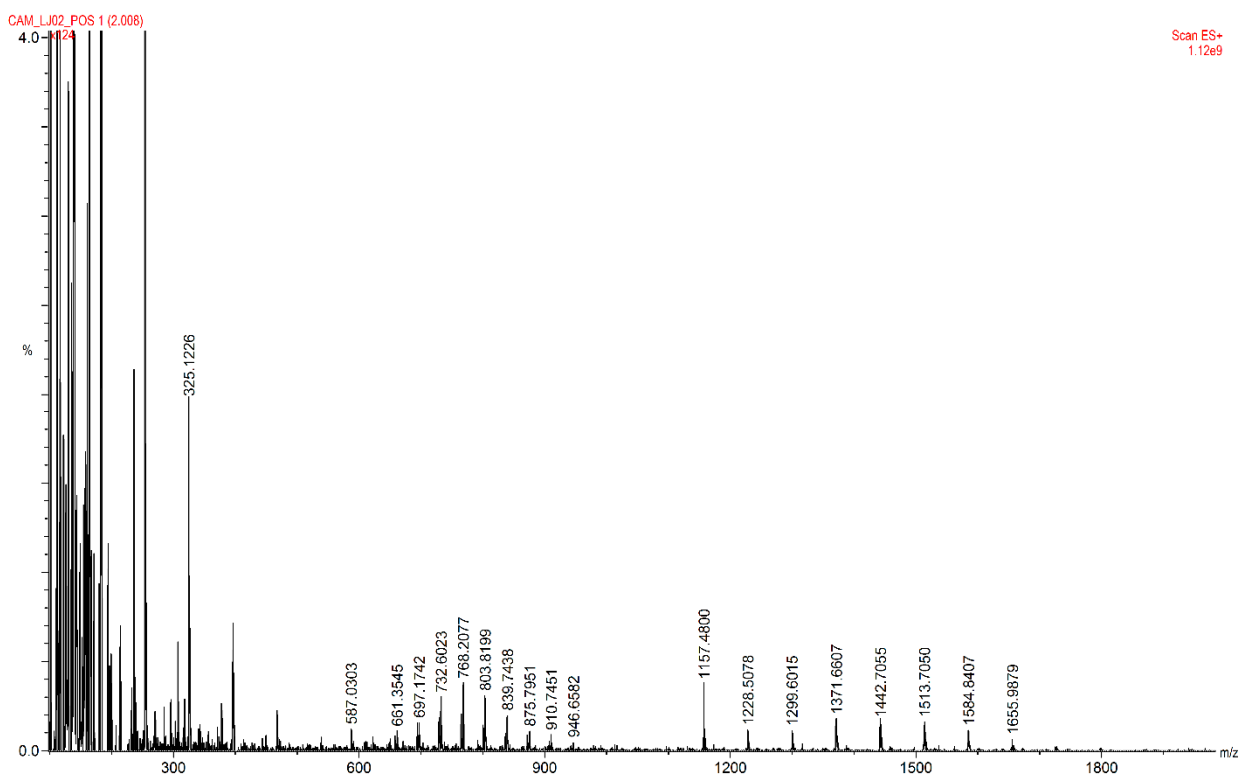

Figure S 35: ESI+ mass spectrum of carbamoylethylated  $\beta\text{CD}$  (**5**) prepared in ball mill (item 10 in Table 1),  $\text{DS} \approx 3.3\text{-}3.5$

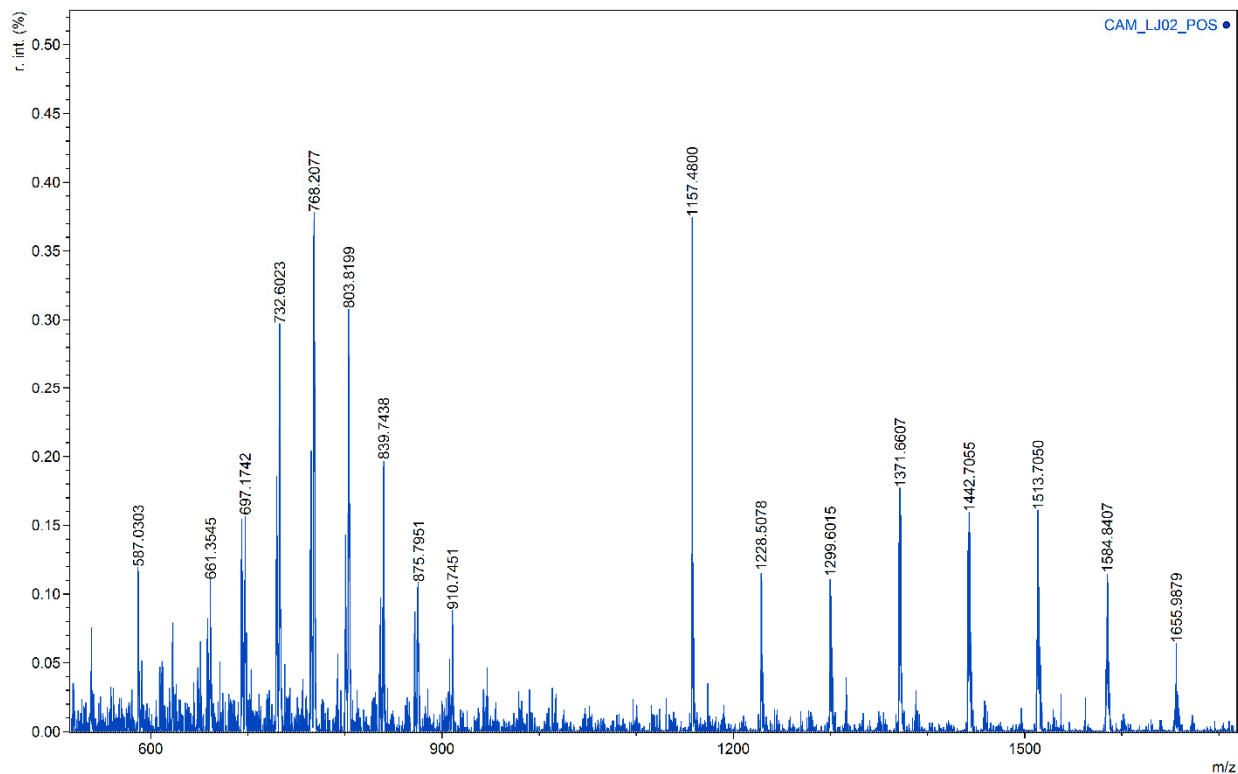

| Meas. m/z | Calc. m/z | $\delta$ (Da) | Z | Annotation                                                                                                     | Formula                                                                                                                                                                                                     |
|-----------|-----------|---------------|---|----------------------------------------------------------------------------------------------------------------|-------------------------------------------------------------------------------------------------------------------------------------------------------------------------------------------------------------|
| 661.3545  | 661.2112  | 0.1432        | 2 | (+2 CH <sub>2</sub> CH <sub>2</sub> CONH <sub>2</sub> ) <sub>2</sub>                                           | (C <sub>42</sub> H <sub>70</sub> O <sub>35</sub> Na <sub>2</sub> ) <sub>1</sub> (CH <sub>1</sub> CH <sub>2</sub> CONH <sub>2</sub> ) <sub>2</sub>                                                           |
| 697.1742  | 696.7298  | 0.4444        | 2 | (+3 CH <sub>2</sub> CH <sub>2</sub> CONH <sub>2</sub> ) <sub>2</sub>                                           | (C <sub>42</sub> H <sub>70</sub> O <sub>35</sub> Na <sub>2</sub> ) <sub>1</sub> (CH <sub>1</sub> CH <sub>2</sub> CONH <sub>2</sub> ) <sub>3</sub>                                                           |
| 732.6023  | 732.2483  | 0.3539        | 2 | (+4 CH <sub>2</sub> CH <sub>2</sub> CONH <sub>2</sub> ) <sub>2</sub>                                           | (C <sub>42</sub> H <sub>70</sub> O <sub>35</sub> Na <sub>2</sub> ) <sub>1</sub> (CH <sub>1</sub> CH <sub>2</sub> CONH <sub>2</sub> ) <sub>4</sub>                                                           |
| 768.2077  | 767.7669  | 0.4409        | 2 | (+5 CH <sub>2</sub> CH <sub>2</sub> CONH <sub>2</sub> ) <sub>2</sub>                                           | (C <sub>42</sub> H <sub>70</sub> O <sub>35</sub> Na <sub>2</sub> ) <sub>1</sub> (CH <sub>1</sub> CH <sub>2</sub> CONH <sub>2</sub> ) <sub>5</sub>                                                           |
| 803.8199  | 803.2854  | 0.5345        | 2 | (+6 CH <sub>2</sub> CH <sub>2</sub> CONH <sub>2</sub> ) <sub>2</sub>                                           | (C <sub>42</sub> H <sub>70</sub> O <sub>35</sub> Na <sub>2</sub> ) <sub>1</sub> (CH <sub>1</sub> CH <sub>2</sub> CONH <sub>2</sub> ) <sub>6</sub>                                                           |
| 839.7438  | 838.8040  | 0.9398        | 2 | (+7 CH <sub>2</sub> CH <sub>2</sub> CONH <sub>2</sub> ) <sub>2</sub>                                           | (C <sub>42</sub> H <sub>70</sub> O <sub>35</sub> Na <sub>2</sub> ) <sub>1</sub> (CH <sub>1</sub> CH <sub>2</sub> CONH <sub>2</sub> ) <sub>7</sub>                                                           |
| 875.7951  | 875.3185  | 0.4766        | 2 | (+7 CH <sub>2</sub> CH <sub>2</sub> CONH <sub>2</sub> +1 CH <sub>2</sub> CH <sub>2</sub> COOH(?)) <sub>2</sub> | (C <sub>42</sub> H <sub>70</sub> O <sub>35</sub> Na <sub>2</sub> ) <sub>1</sub> (CH <sub>1</sub> CH <sub>2</sub> CONH <sub>2</sub> ) <sub>7</sub> /8(CH <sub>2</sub> CH <sub>2</sub> COOH) <sub>1</sub> (?) |
| 910.7451  | 909.8411  | 0.9040        | 2 | (+8 CH <sub>2</sub> CH <sub>2</sub> CONH <sub>2</sub> +1 CH <sub>2</sub> CH <sub>2</sub> COOH(?)) <sub>2</sub> | (C <sub>42</sub> H <sub>70</sub> O <sub>35</sub> Na <sub>2</sub> ) <sub>1</sub> (CH <sub>1</sub> CH <sub>2</sub> CONH <sub>2</sub> ) <sub>8</sub> /9(CH <sub>2</sub> CH <sub>2</sub> COOH) <sub>1</sub> (?) |
| 1157.4800 | 1157.3590 | 0.1210        | 1 | C <sub>42</sub> H <sub>70</sub> O <sub>35</sub> (BCD)                                                          | (C <sub>42</sub> H <sub>70</sub> O <sub>35</sub> Na <sub>1</sub> ) <sub>1</sub> (CH <sub>1</sub> CH <sub>2</sub> CONH <sub>2</sub> ) <sub>0</sub>                                                           |
| 1228.5078 | 1228.3961 | 0.1118        | 1 | +1 CH <sub>2</sub> CH <sub>2</sub> CONH <sub>2</sub>                                                           | (C <sub>42</sub> H <sub>70</sub> O <sub>35</sub> Na <sub>1</sub> ) <sub>1</sub> (CH <sub>1</sub> CH <sub>2</sub> CONH <sub>2</sub> ) <sub>1</sub>                                                           |
| 1299.6015 | 1299.4332 | 0.1682        | 1 | +2 CH <sub>2</sub> CH <sub>2</sub> CONH <sub>2</sub>                                                           | (C <sub>42</sub> H <sub>70</sub> O <sub>35</sub> Na <sub>1</sub> ) <sub>1</sub> (CH <sub>1</sub> CH <sub>2</sub> CONH <sub>2</sub> ) <sub>2</sub>                                                           |
| 1371.6607 | 1370.4703 | 1.1904        | 1 | +3 CH <sub>2</sub> CH <sub>2</sub> CONH <sub>2</sub>                                                           | (C <sub>42</sub> H <sub>70</sub> O <sub>35</sub> Na <sub>1</sub> ) <sub>1</sub> (CH <sub>1</sub> CH <sub>2</sub> CONH <sub>2</sub> ) <sub>3</sub>                                                           |
| 1442.7055 | 1441.5074 | 1.1981        | 1 | +4 CH <sub>2</sub> CH <sub>2</sub> CONH <sub>2</sub>                                                           | (C <sub>42</sub> H <sub>70</sub> O <sub>35</sub> Na <sub>1</sub> ) <sub>1</sub> (CH <sub>1</sub> CH <sub>2</sub> CONH <sub>2</sub> ) <sub>4</sub>                                                           |
| 1513.7050 | 1512.5446 | 1.1604        | 1 | +5 CH <sub>2</sub> CH <sub>2</sub> CONH <sub>2</sub>                                                           | (C <sub>42</sub> H <sub>70</sub> O <sub>35</sub> Na <sub>1</sub> ) <sub>1</sub> (CH <sub>1</sub> CH <sub>2</sub> CONH <sub>2</sub> ) <sub>5</sub>                                                           |
| 1584.8407 | 1583.5817 | 1.2590        | 1 | +6 CH <sub>2</sub> CH <sub>2</sub> CONH <sub>2</sub>                                                           | (C <sub>42</sub> H <sub>70</sub> O <sub>35</sub> Na <sub>1</sub> ) <sub>1</sub> (CH <sub>1</sub> CH <sub>2</sub> CONH <sub>2</sub> ) <sub>6</sub>                                                           |
| 1655.9879 | 1654.6188 | 1.3691        | 1 | +7 CH <sub>2</sub> CH <sub>2</sub> CONH <sub>2</sub>                                                           | (C <sub>42</sub> H <sub>70</sub> O <sub>35</sub> Na <sub>1</sub> ) <sub>1</sub> (CH <sub>1</sub> CH <sub>2</sub> CONH <sub>2</sub> ) <sub>7</sub>                                                           |

Figure S 36: Peak identification in ESI+ mass spectrum of carbamoylethylated  $\beta$ CD (**5**) prepared in ball mill (item 10 in Table 1), DS  $\approx$  3.8-4.3



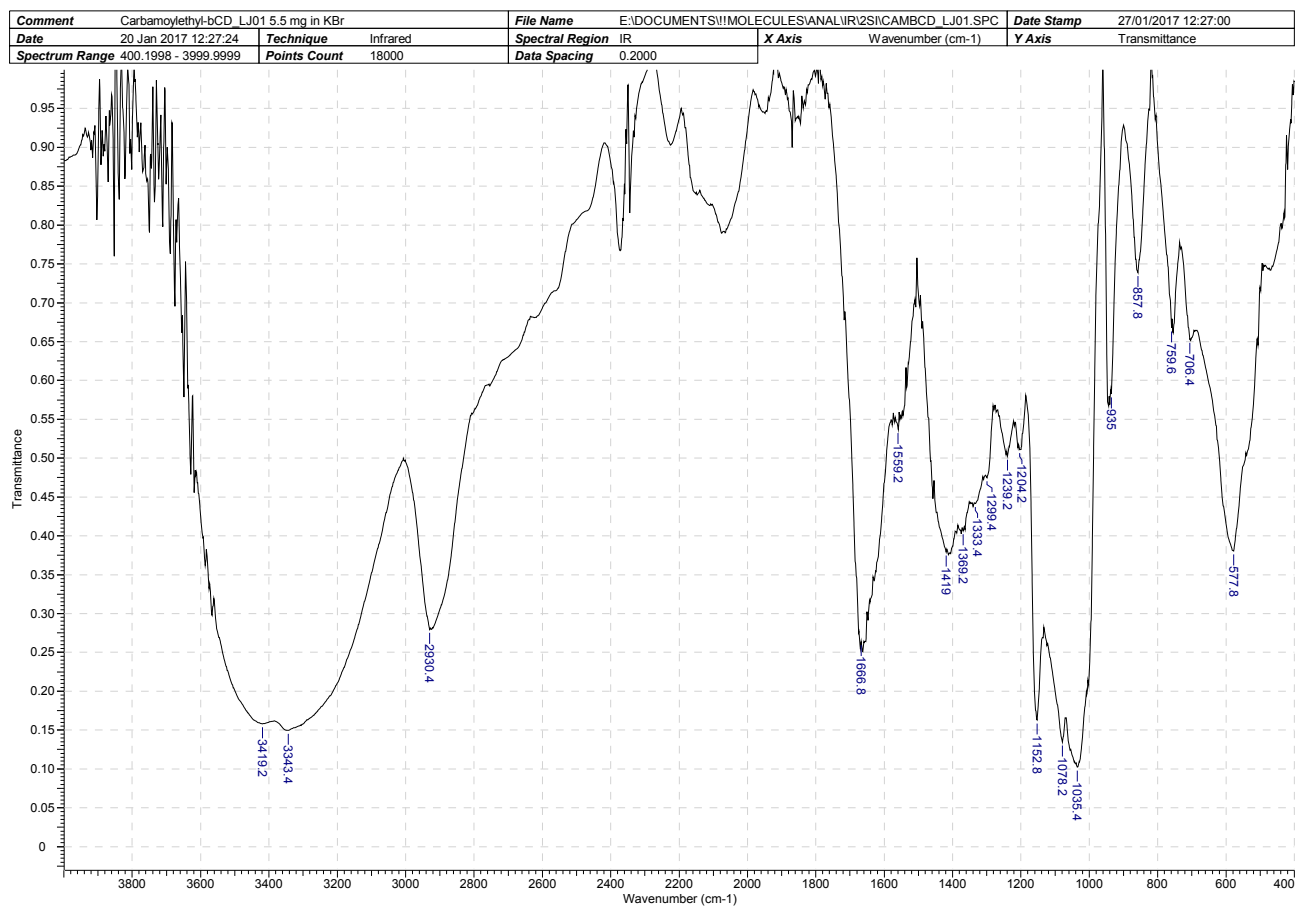

Figure S 37: IR spectrum of carbamoylethylated  $\beta$ CD (5) prepared in ball mill (item 10 in Table 1), DS  $\approx$ 3.3-3.5

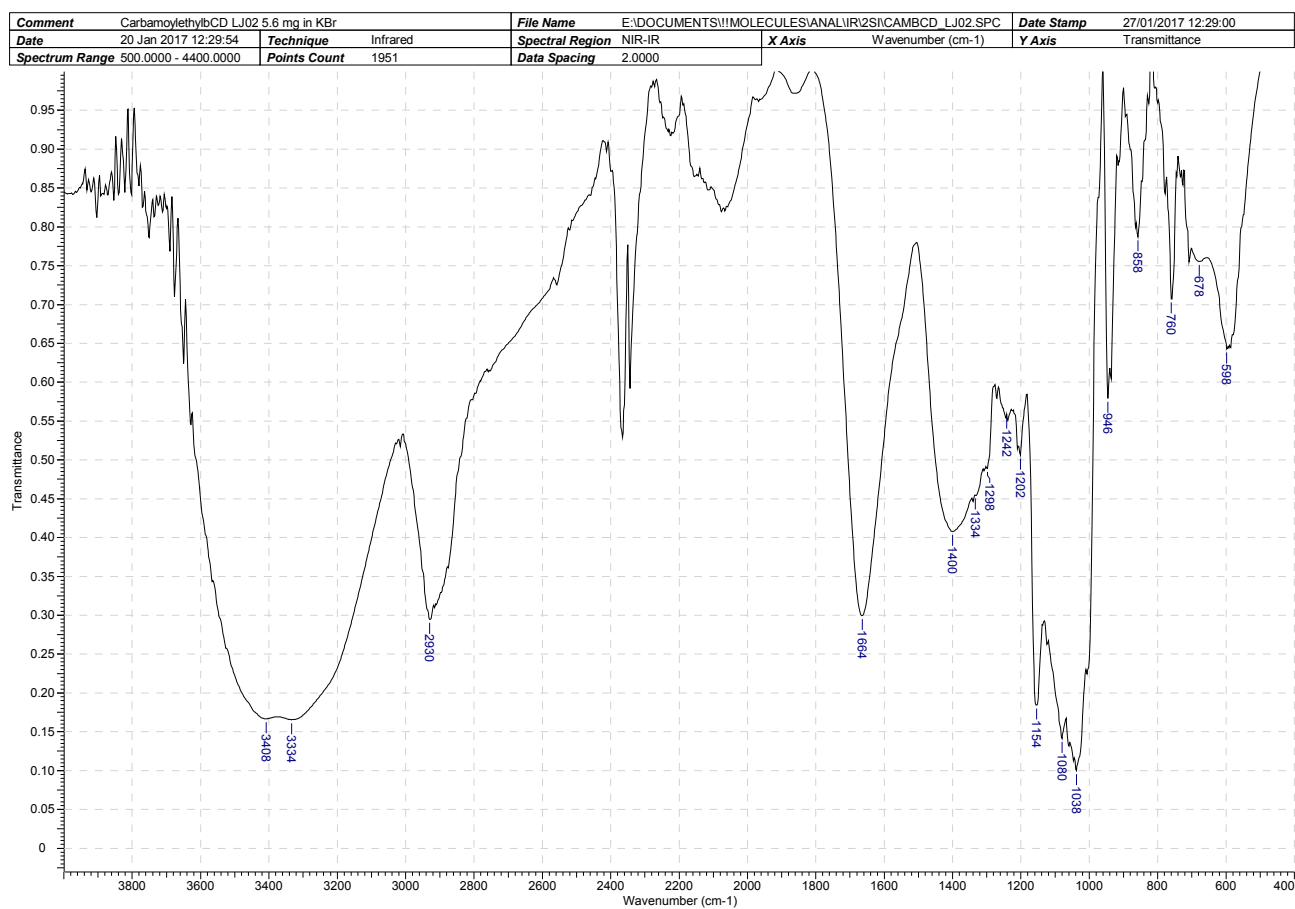

Figure S 38: IR spectrum of carbamoylethylated  $\beta$ CD (5) prepared in ball mill (item 10 in Table 1), DS  $\approx$ 3.3-3.5

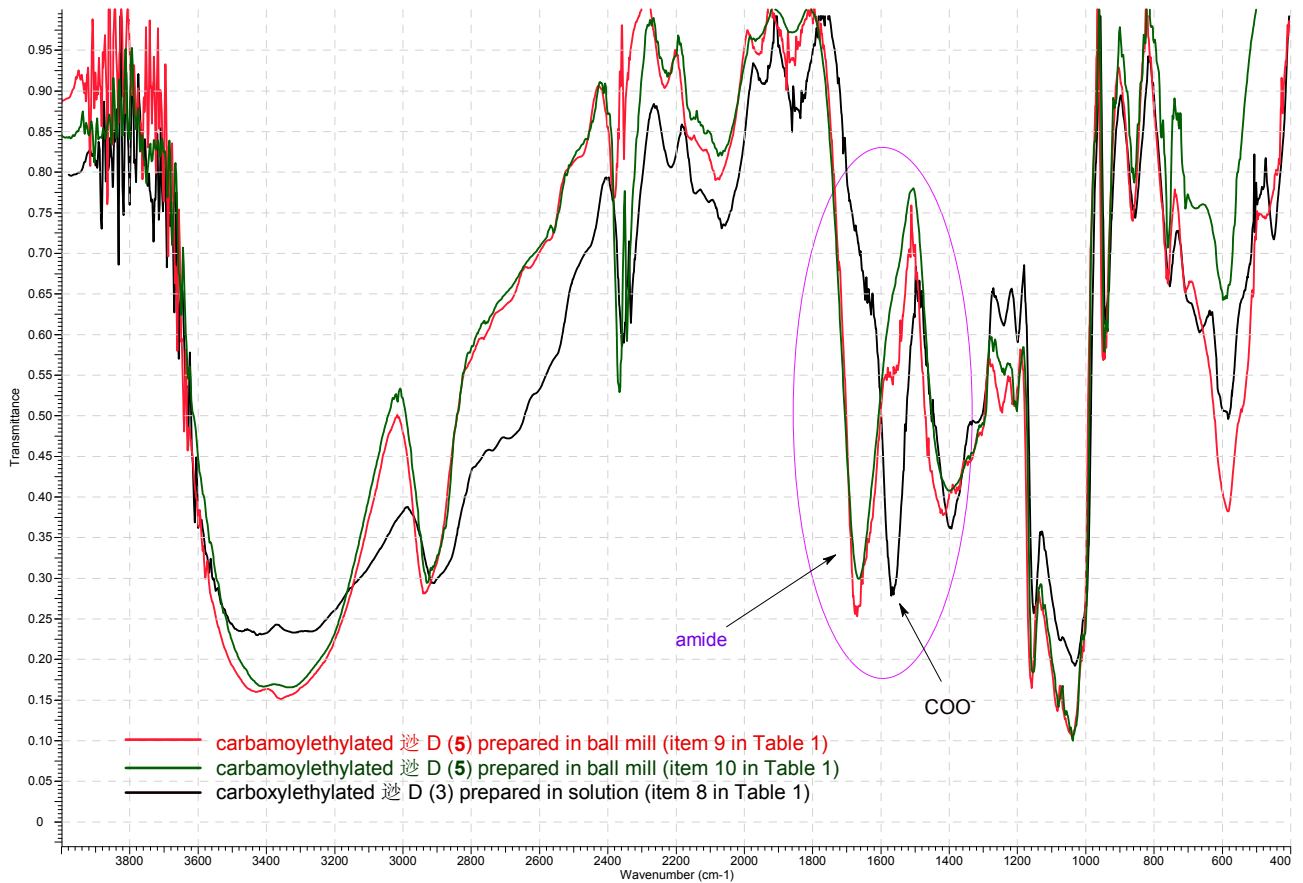

Figure S 39: Overlay of IR spectra of carbamoylethylated βCD (5) prepared in ball mill (item 9&10 in Table 1), DS ≈3.3-3.5 carboxylethylated βCD prepared in solution (item 8 in Table 1)

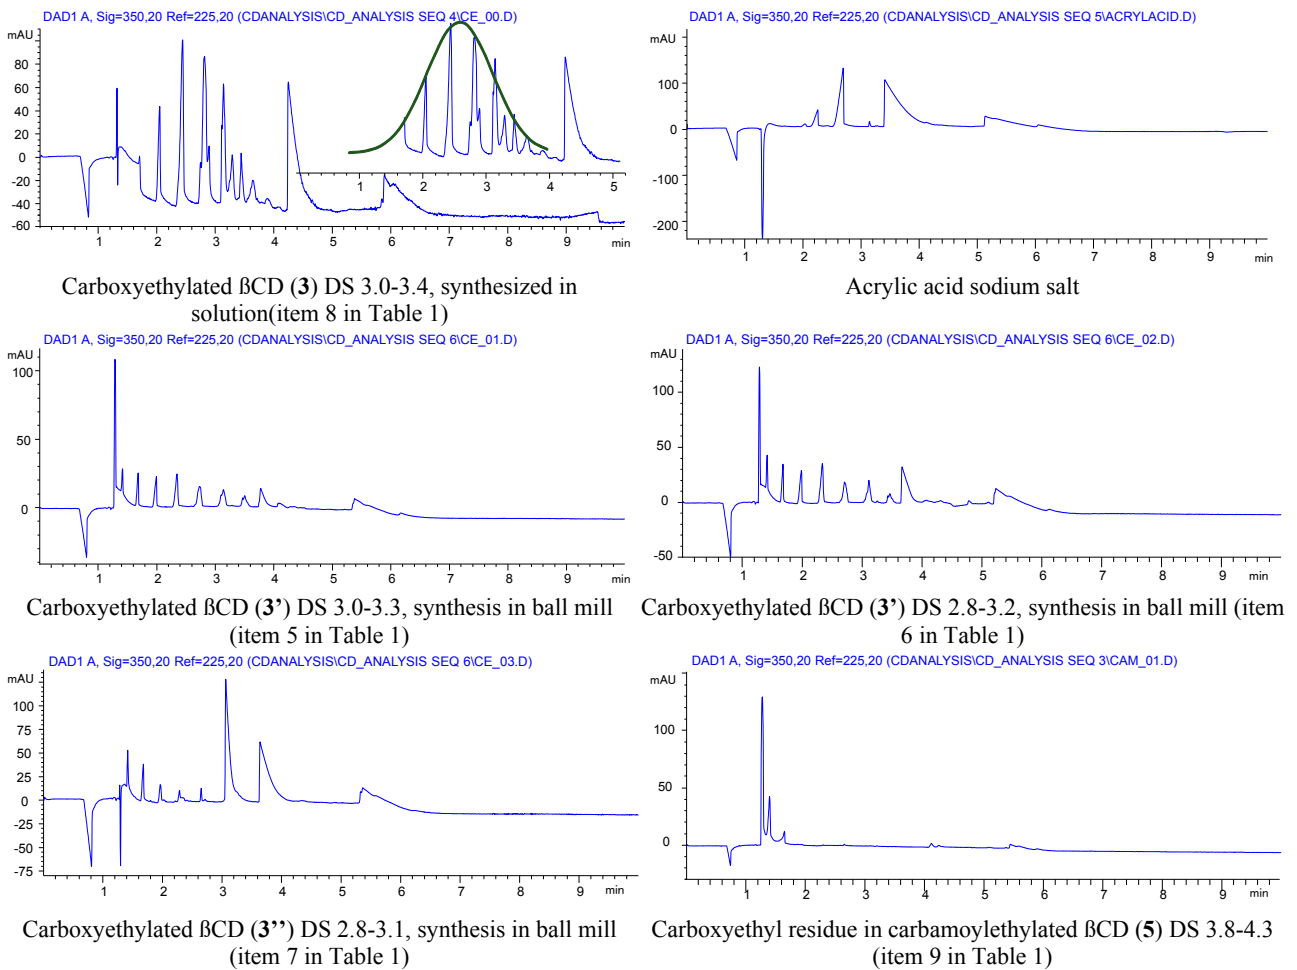

Figure S 40: Capillary electropherogram of carboxylethylated βCDs



|                        |             |                |                                                              |                        |                                                      |
|------------------------|-------------|----------------|--------------------------------------------------------------|------------------------|------------------------------------------------------|
| Acquisition Time (sec) | 4.0000      | Comment        | samplename: SBbCD_00SOL solvent: d2o temp: 25C probe: sw8099 |                        |                                                      |
| Date                   | Dec 17 2010 | Date Stamp     | Dec 17 2010                                                  | File Name              | E:\doc\1\molecules\Anal\NMR\SBbCD_00SOL\s2pul_d2ofid |
| Frequency (MHz)        | 399.91      | Nucleus        | 1H                                                           | Number of Transients   | 16                                                   |
| Points Count           | 65536       | Pulse Sequence | s2pul                                                        | Receiver Gain          | 20.00                                                |
| Spectrum Offset (Hz)   | 1992.8751   | Spectrum Type  | STANDARD                                                     | Sweep Width (Hz)       | 10000.00                                             |
|                        |             |                |                                                              | Original Points Count  | 40000                                                |
|                        |             |                |                                                              | Solvent                | DEUTERIUM OXIDE                                      |
|                        |             |                |                                                              | Temperature (degree C) | 25.000                                               |

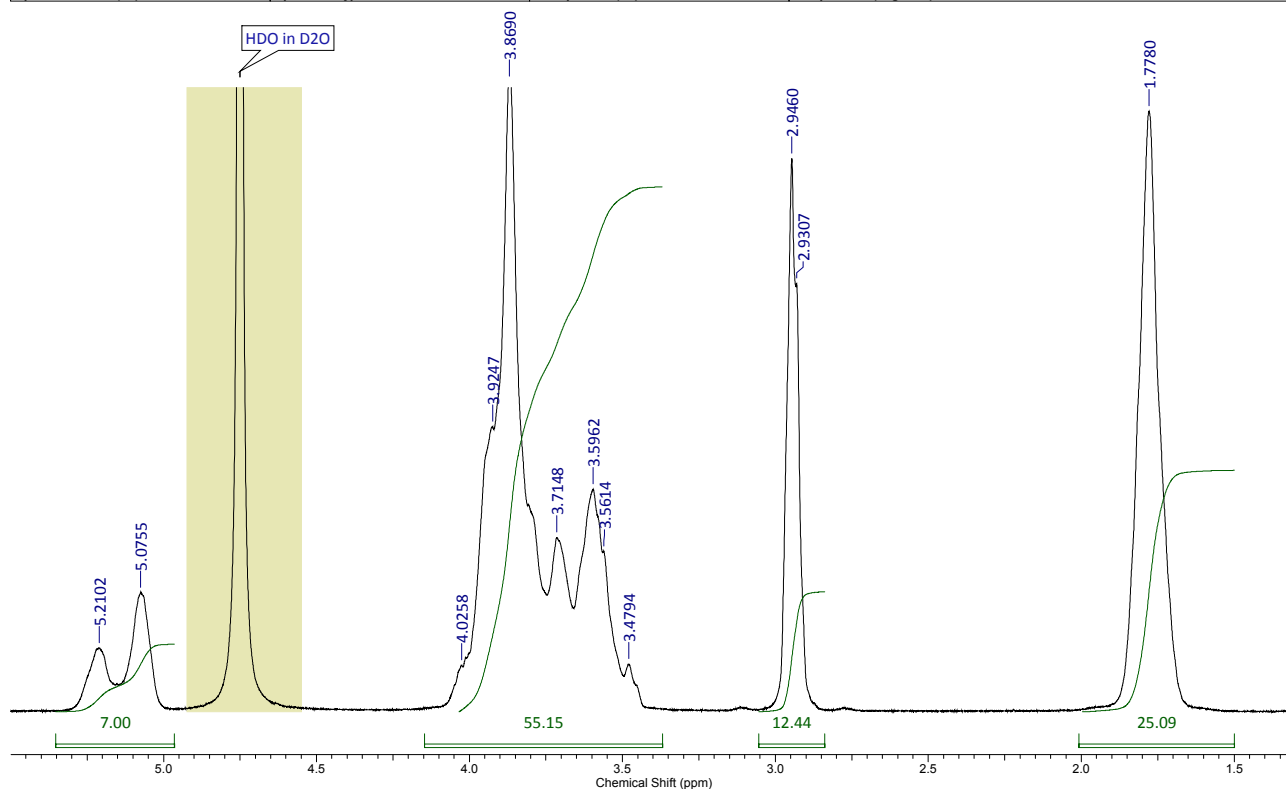

Figure S 41: Proton NMR spectrum of sulfobutylated  $\beta$ CD (4) prepared in solution (item 11 in Table 1),  $DS \approx 6.2-6.5$

|                        |                  |                      |                                                              |                       |                 |                      |                     |
|------------------------|------------------|----------------------|--------------------------------------------------------------|-----------------------|-----------------|----------------------|---------------------|
| Acquisition Time (sec) | (0.1500, 0.0023) | Comment              | samplename: SBbCD_00SOL solvent: d2o temp: 25C probe: sw8099 |                       | Date            | 17 Dec 2010 09:21:12 |                     |
| Date Stamp             | Dec 17 2010      | File Name            | E:\doc\1\molecules\Anal\NMR\SBbCD_00SOL\ghsqc_d2ofid         |                       | Frequency (MHz) | (399.91, 100.57)     |                     |
| Nucleus                | (1H, 13C)        | Number of Transients | 16                                                           | Original Points Count | (1500, 64)      | Points Count         | (8192, 256)         |
| Pulse Sequence         | ghsqc            | Solvent              | d2o                                                          | Spectrum Type         | HSQC            | Sweep Width (Hz)     | (9998.78, 28298.12) |

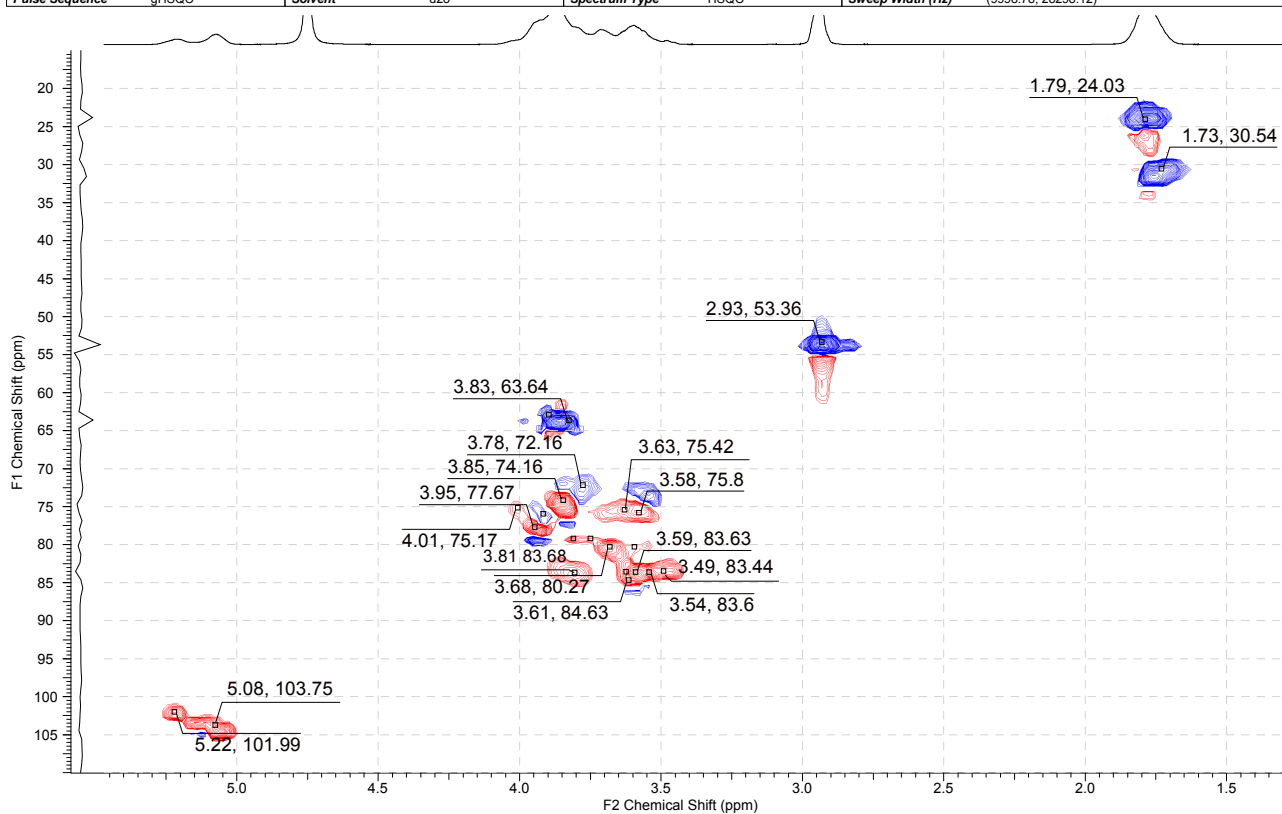

Figure S 42: HSQC-DEPT spectrum of sulfobutylated  $\beta$ CD (4) prepared in solution (item 11 in Table 1),  $DS \approx 6.2-6.5$

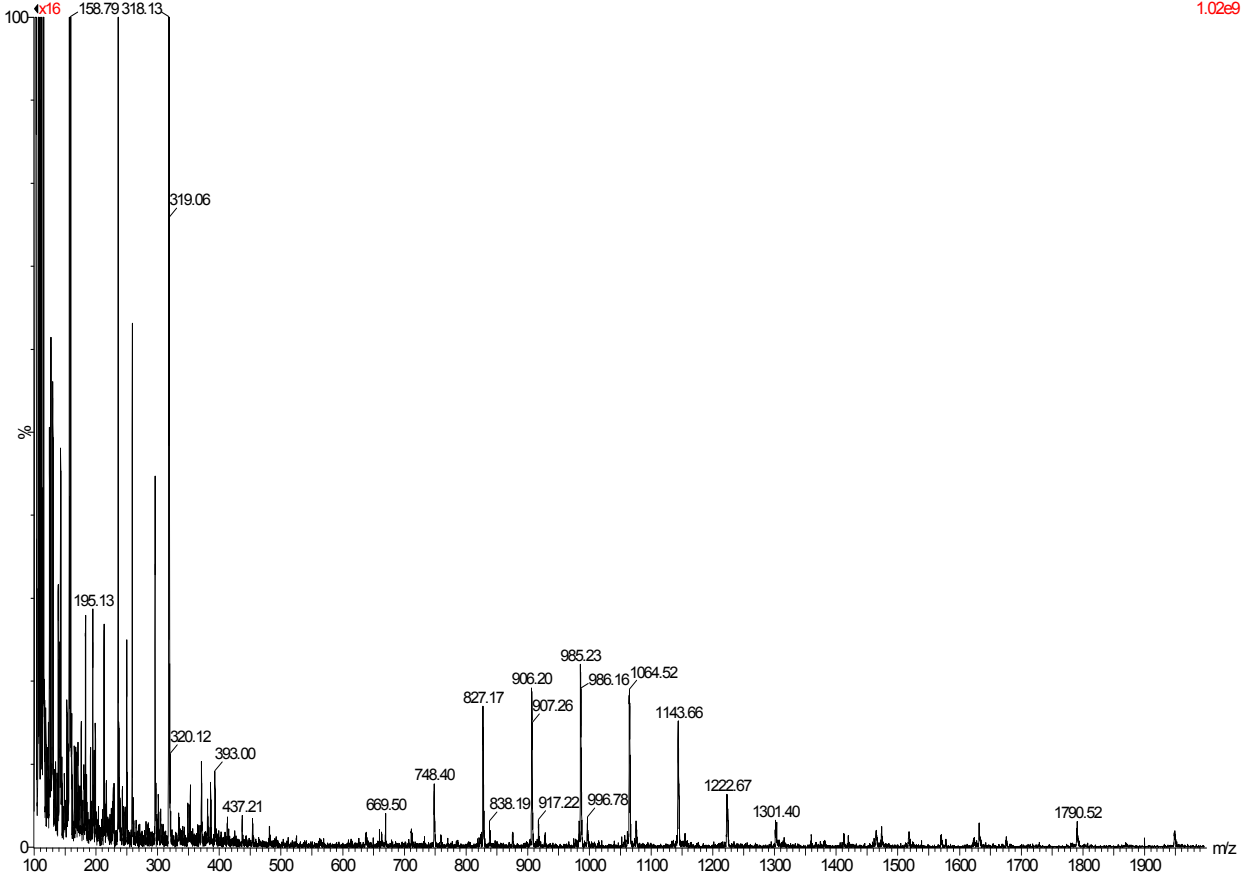

Figure S 43: ESI+ mass spectrum of sulfobutylated  $\beta$ CD (4) prepared in solution (item 11 in Table 1),  $DS \approx 6.2-6.5$

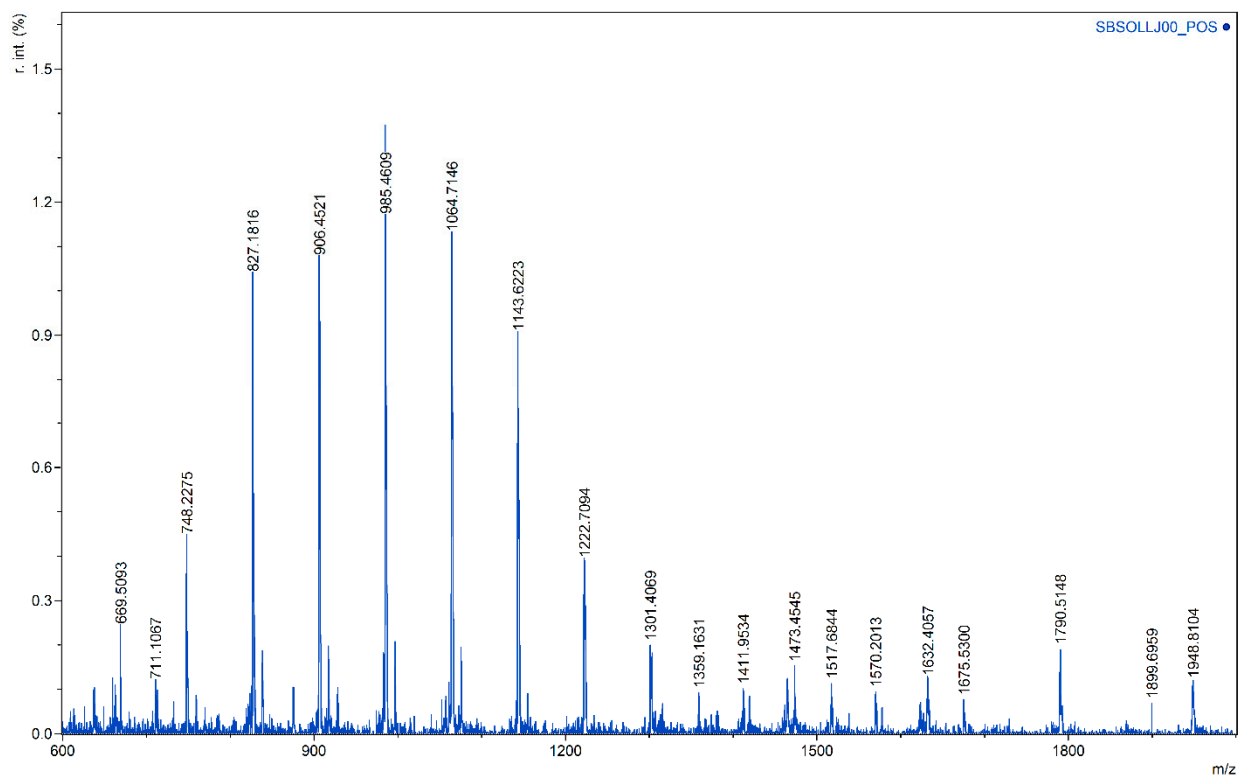

| Meas. m/z | Calc. m/z | $\delta$ (Da) | Z | Annotation                    | Formula                                 |
|-----------|-----------|---------------|---|-------------------------------|-----------------------------------------|
| 669.5093  | 669.1748  | 0.3345        | 2 | (+1 C4H8SO3Na)/2              | (C42H70O35Na2)1(C4H7SO3H)0(C4H7SO3Na)1  |
| 711.1067  | 709.7879  | 1.3188        | 3 | (+1 C4H8SO3H +5 C4H8SO3Na)/3  | (C42H70O35Na3)1(C4H7SO3H)1(C4H7SO3Na)5  |
| 748.2275  | 748.1755  | 0.0520        | 2 | (+2 C4H8SO3Na)/2              | (C42H70O35Na2)1(C4H7SO3H)0(C4H7SO3Na)2  |
| 827.1816  | 827.1761  | 0.0054        | 2 | (+3 C4H8SO3Na)/2              | (C42H70O35Na2)1(C4H7SO3H)0(C4H7SO3Na)3  |
| 906.4521  | 906.1768  | 0.2752        | 2 | (+4 C4H8SO3Na)/2              | (C42H70O35Na2)1(C4H7SO3H)0(C4H7SO3Na)4  |
| 985.4609  | 985.1775  | 0.2834        | 2 | (+5 C4H8SO3Na)/2              | (C42H70O35Na2)1(C4H7SO3H)0(C4H7SO3Na)5  |
| 1064.7146 | 1064.1782 | 0.5364        | 2 | (+6 C4H8SO3Na)/2              | (C42H70O35Na2)1(C4H7SO3H)0(C4H7SO3Na)6  |
| 1143.6223 | 1143.1789 | 0.4434        | 2 | (+7 C4H8SO3Na)/2              | (C42H70O35Na2)1(C4H7SO3H)0(C4H7SO3Na)7  |
| 1222.7094 | 1222.1795 | 0.5299        | 2 | (+8 C4H8SO3Na)/2              | (C42H70O35Na2)1(C4H7SO3H)0(C4H7SO3Na)8  |
| 1301.4069 | 1301.1802 | 0.2267        | 2 | (+9 C42H70O35Na2)/2           | (C42H70O35Na2)1(C4H7SO3H)0(C4H7SO3Na)9  |
| 1315.4595 | 1315.3603 | 0.0991        | 1 | +1 C4H8SO3Na                  | (C42H70O35Na1)1(C4H7SO3H)0(C4H7SO3Na)1  |
| 1359.1631 | 1358.1990 | 0.9642        | 2 | (+2 C4H8SO3H)/2               | (C42H70O35Na2)1(C4H7SO3H)2(C4H7SO3Na)8  |
| 1473.4545 | 1473.3617 | 0.0928        | 1 | +2 C4H8SO3Na                  | (C42H70O35Na1)1(C4H7SO3H)0(C4H7SO3Na)2  |
| 1517.6844 | 1516.2003 | 1.4841        | 2 | (+2 C4H8SO3H +10 C4H8SO3Na)/2 | (C42H70O35Na2)1(C4H7SO3H)2(C4H7SO3Na)10 |
| 1632.4057 | 1631.3631 | 1.0427        | 1 | +3 C4H8SO3Na                  | (C42H70O35Na1)1(C4H7SO3H)0(C4H7SO3Na)3  |
| 1675.5300 | 1674.2017 | 1.3283        | 2 | (+2 C4H8SO3H +12 C4H8SO3Na)/2 | (C42H70O35Na2)1(C4H7SO3H)2(C4H7SO3Na)12 |
| 1790.5148 | 1789.3644 | 1.1503        | 1 | +4 C4H8SO3Na                  | (C42H70O35Na1)1(C4H7SO3H)0(C4H7SO3Na)4  |
| 1948.8104 | 1947.3658 | 1.4446        | 1 | +5 C4H8SO3Na                  | (C42H70O35Na1)1(C4H7SO3H)0(C4H7SO3Na)5  |

Figure S 44: Peak identification in ESI+ mass spectrum of sulfobutylated  $\beta$ CD (4) prepared in solution (item 11 in Table 1), DS  $\approx$ 6.2-6.5

|                        |                      |                      |                                          |                  |                 |                        |                 |
|------------------------|----------------------|----------------------|------------------------------------------|------------------|-----------------|------------------------|-----------------|
| Acquisition Time (sec) | 3.6438               | Comment              | SBBCD_LJ01 (20mg in 0.6ml D2O)           |                  | Date            | 30 Sep 2016 15:09:20   |                 |
| Date Stamp             | 30 Sep 2016 15:09:20 | File Name            | D:\Docs\1\Molecules\Anal\SBBCD_LJ01\1fid |                  | Frequency (MHz) | 300.13                 |                 |
| Nucleus                | 1H                   | Number of Transients | 64                                       | Origin           | spect           | Original Points Count  | 16384           |
| Points Count           | 131072               | Pulse Sequence       | zg                                       | Receiver Gain    | 90.50           | SW(cyclical) (Hz)      | 4496.40         |
| Spectrum Offset (Hz)   | 1095.8673            | Spectrum Type        | STANDARD                                 | Sweep Width (Hz) | 4496.37         | Temperature (degree C) | 22.160          |
|                        |                      |                      |                                          |                  |                 | Owner                  | root            |
|                        |                      |                      |                                          |                  |                 | Solvent                | DEUTERIUM OXIDE |

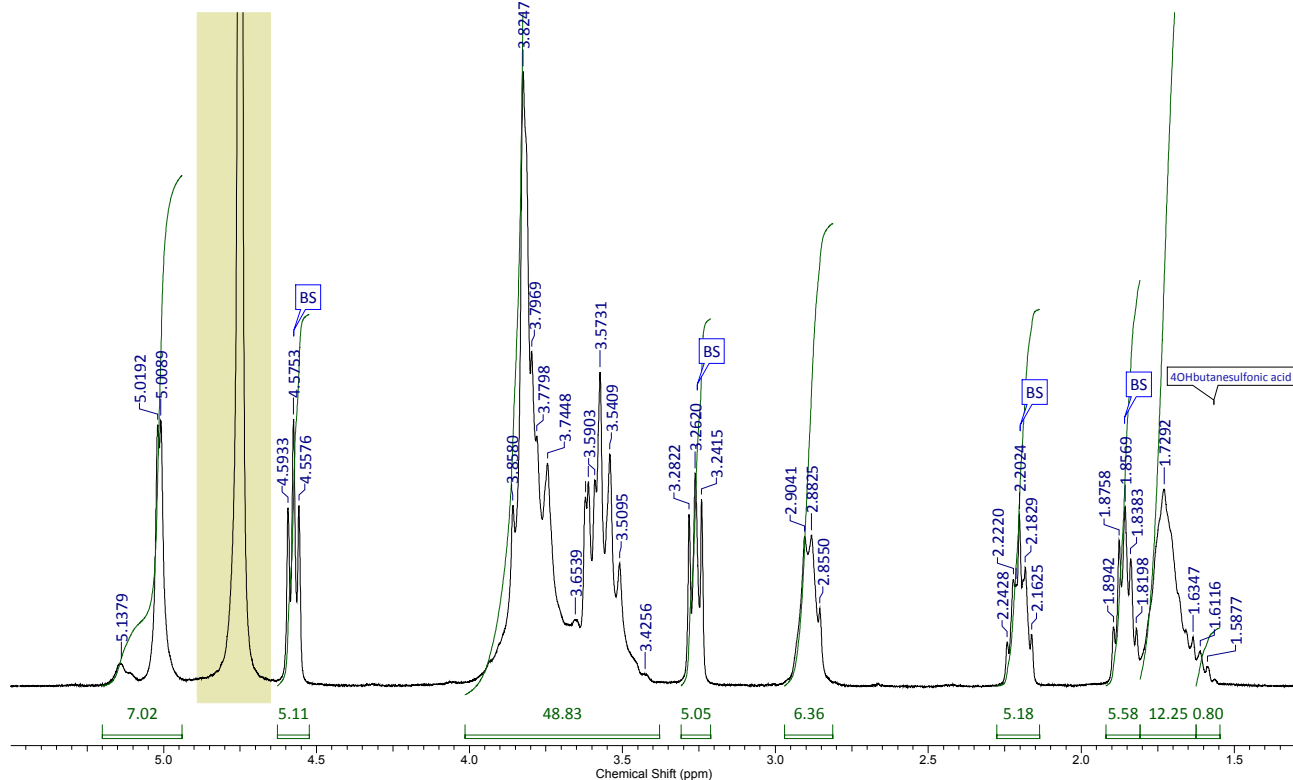

Figure S 45: Proton NMR spectrum of sulfobutylated  $\beta$ CD (4') prepared in ball mill (item 12 in Table 1),  $DS \approx 3.1-3.3$

|                        |                                                                  |                      |                                 |                        |                       |                       |           |
|------------------------|------------------------------------------------------------------|----------------------|---------------------------------|------------------------|-----------------------|-----------------------|-----------|
| Acquisition Time (sec) | (0.0427, 0.0051)                                                 | Comment              | 5 mm BBO 1H-BB Z-GRD Z8284/0059 |                        | Date                  | 19 Sep 2016 12:04:24  |           |
| File Name              | D:\Docs\1\Notebooks\BM Reactions\NMR\SBBCD_LJ01\SBBCD_LJ01\3iser | Frequency (MHz)      | (300.13, 75.47)                 |                        | Original Points Count | (128, 64)             |           |
| Nucleus                | (1H, 13C)                                                        | Number of Transients | 32                              | Origin                 | spect                 | Original Points Count | (128, 64) |
| Owner                  | psm                                                              | Points Count         | (512, 256)                      | Pulse Sequence         | hsqcdeptp             | Solvent               | DMSO      |
| Spectrum Type          | HSQC-DEPT                                                        | Sweep Width (Hz)     | (2991.75, 12451.17)             | Temperature (degree C) | 22.360                |                       |           |
| Title                  | SBBCD_LJ02_HSQC_D2O_190916_2010_RG=100                           |                      |                                 |                        |                       |                       |           |

AutoPhase Ambiguous Phase

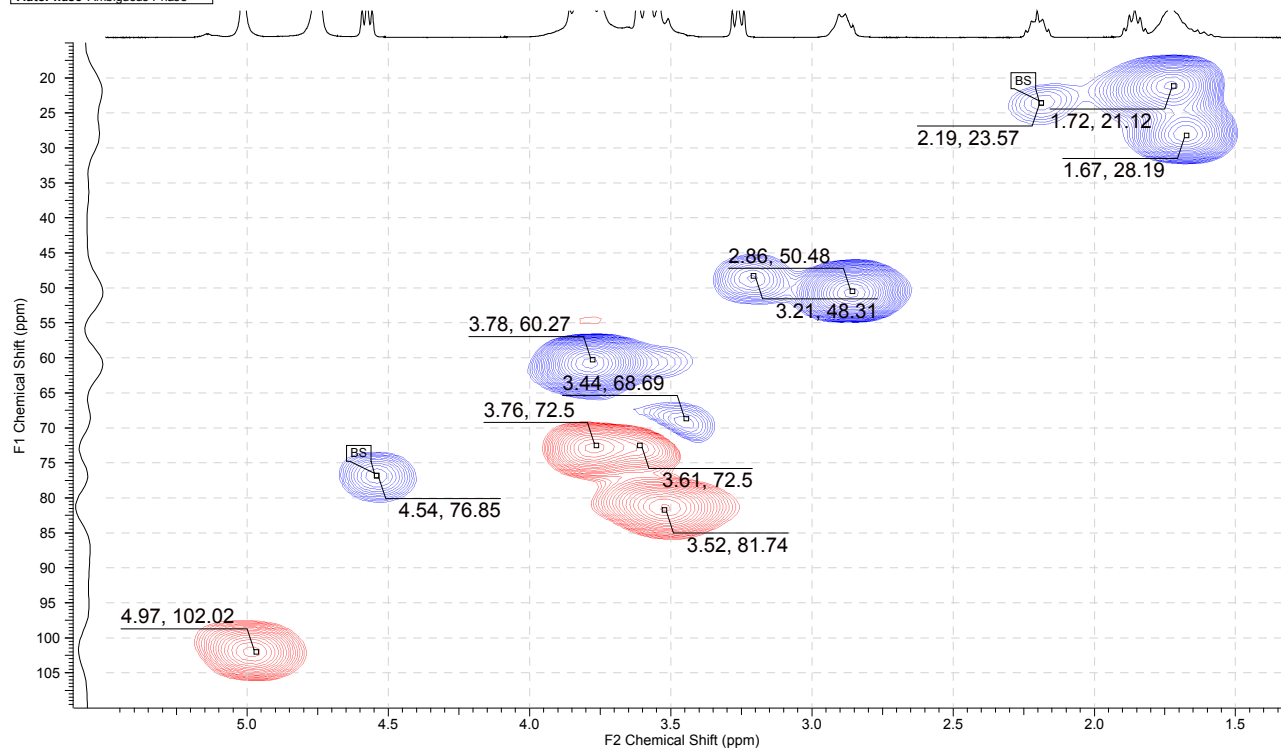

Figure S 46: HSQC-DEPT spectrum of sulfobutylated  $\beta$ CD (4') prepared in ball mill (item 12 in Table 1),  $DS \approx 3.1-3.3$

|                        |                      |                      |                                                       |                      |          |                      |         |                        |         |
|------------------------|----------------------|----------------------|-------------------------------------------------------|----------------------|----------|----------------------|---------|------------------------|---------|
| Acquisition Time (sec) | 3.6438               | Comment              | SBBCD_LJ03 (20mg in 0.6ml D2O)                        |                      | Date     | 28 Sep 2016 12:54:56 |         |                        |         |
| Date Stamp             | 28 Sep 2016 12:54:56 | File Name            | D:\Docs\1\Notebooks\BM_Reactions\NMR\SBBCD_LJ03\1.fid |                      |          |                      |         |                        |         |
| Frequency (MHz)        | 300.13               | Nucleus              | 1H                                                    | Number of Transients | 64       | Origin               | spect   | Original Points Count  | 16384   |
| Owner                  | root                 | Points Count         | 131072                                                | Pulse Sequence       | zg       | Receiver Gain        | 90.50   | SW(cyclical) (Hz)      | 4496.40 |
| Solvent                | DMSO-d6              | Spectrum Offset (Hz) | 1096.1024                                             | Spectrum Type        | STANDARD | Sweep Width (Hz)     | 4496.37 | Temperature (degree C) | 22.160  |

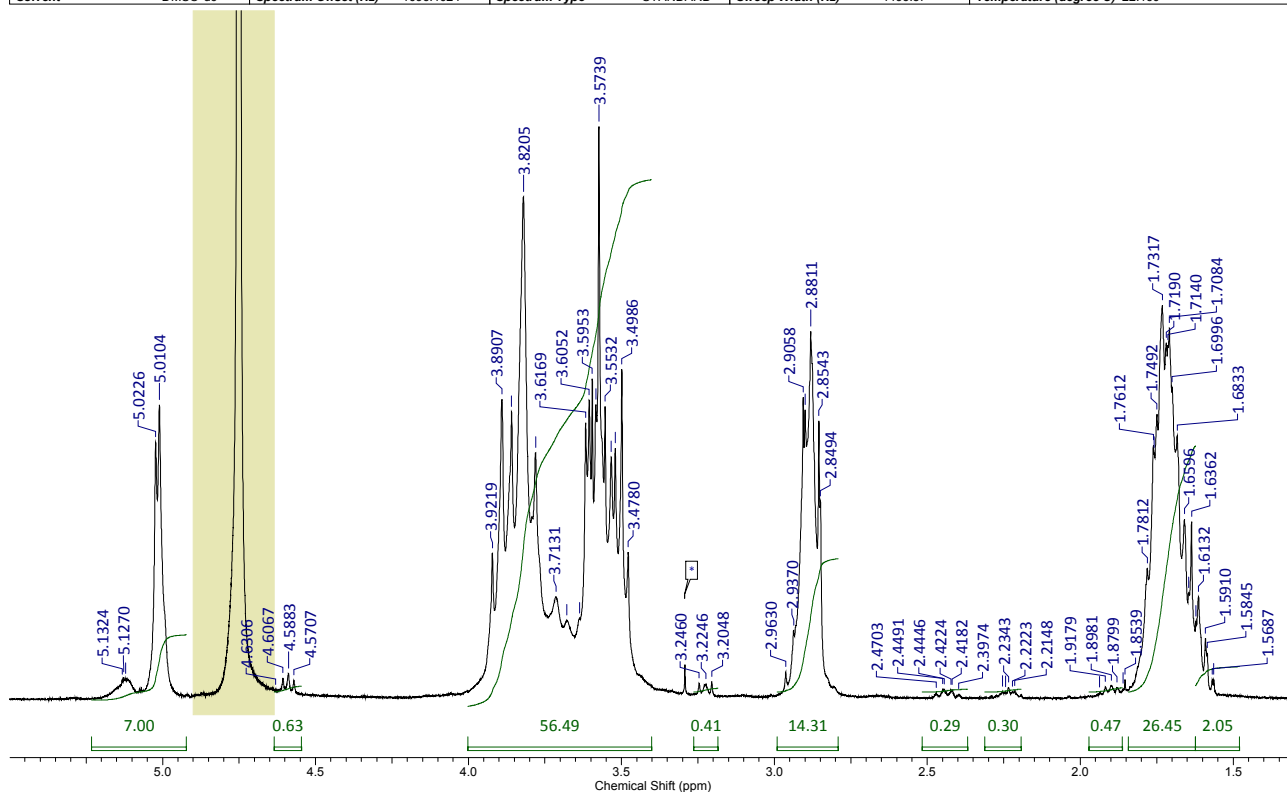

Figure S 47: Proton NMR spectrum of sulfobutylated  $\beta$ CD ( $4'$ ) prepared in ball mill (item 13 in Table 1),  $DS \approx 5.2-5.8$

|                        |                                                       |                        |                                 |                       |           |                      |           |
|------------------------|-------------------------------------------------------|------------------------|---------------------------------|-----------------------|-----------|----------------------|-----------|
| Acquisition Time (sec) | (0.0427, 0.0051)                                      | Comment                | 5 mm BBO 1H-BB Z-GRD Z6284/0059 |                       | Date      | 28 Sep 2016 13:48:32 |           |
| File Name              | D:\Docs\1\Notebooks\BM_Reactions\NMR\SBBCD_LJ03\2.ser | Frequency (MHz)        | (300.13, 75.47)                 |                       | Nucleus   | (1H, 13C)            |           |
| Number of Transients   | 32                                                    | Origin                 | spect                           | Original Points Count | (128, 64) | Owner                | psm       |
| Points Count           | (512, 256)                                            | Pulse Sequence         | hsgcdetgp                       | Solvent               | DMSO      | Spectrum Type        | HSQC-DEPT |
| Sweep Width (Hz)       | (2991.75, 12451.17)                                   | Temperature (degree C) | 22.260                          |                       |           |                      |           |

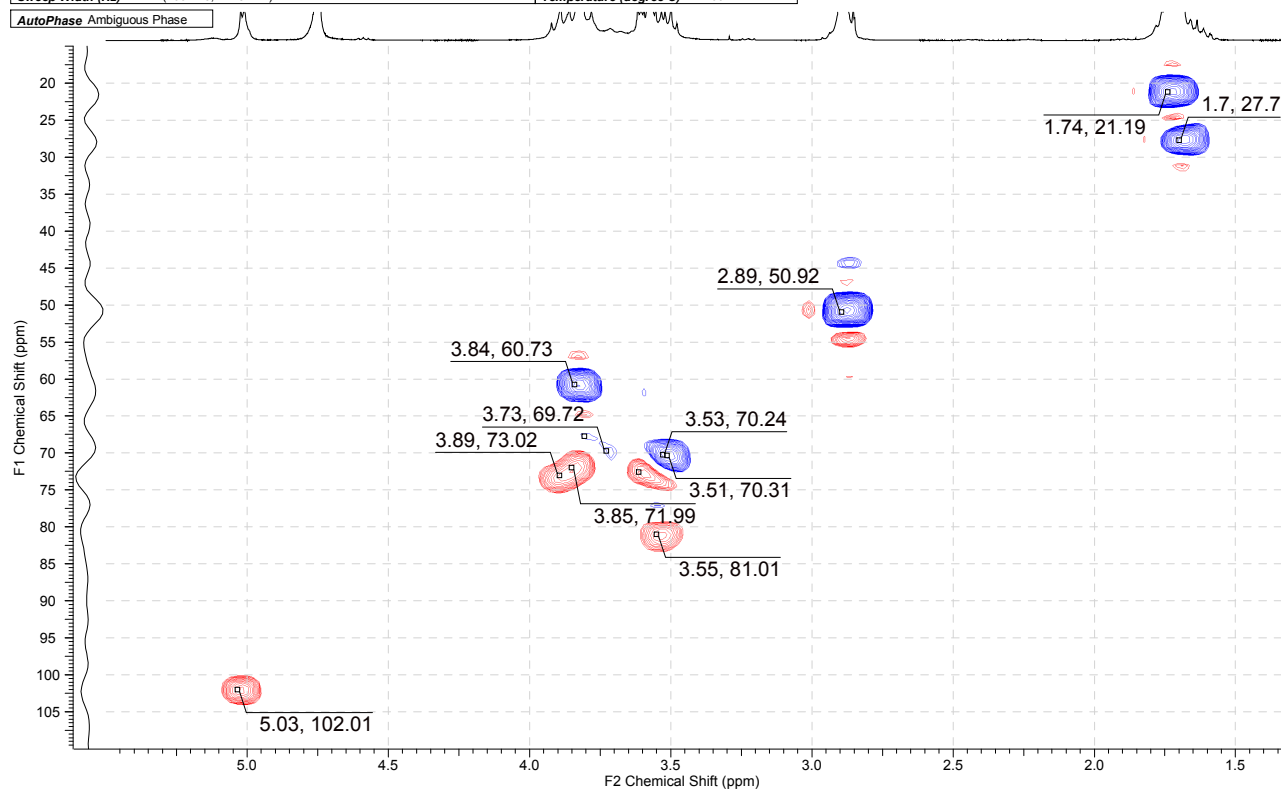

Figure S 48: HSQC-DEPT spectrum of sulfobutylated  $\beta$ CD ( $4'$ ) prepared in ball mill (item 13 in Table 1),  $DS \approx 5.2-5.8$



|                        |                      |                      |                                                       |                      |          |                      |         |                        |         |
|------------------------|----------------------|----------------------|-------------------------------------------------------|----------------------|----------|----------------------|---------|------------------------|---------|
| Acquisition Time (sec) | 3.6438               | Comment              | SBBCD_LJ03 (20mg in 0.6ml D2O)                        |                      | Date     | 28 Sep 2016 12:54:56 |         |                        |         |
| Date Stamp             | 28 Sep 2016 12:54:56 | File Name            | D:\Docs\1\Notebooks\BM_Reactions\NMR\SBBCD_LJ03\1.fid |                      |          |                      |         |                        |         |
| Frequency (MHz)        | 300.13               | Nucleus              | 1H                                                    | Number of Transients | 64       | Origin               | spect   | Original Points Count  | 16384   |
| Owner                  | root                 | Points Count         | 131072                                                | Pulse Sequence       | zg       | Receiver Gain        | 90.50   | SW(cyclical) (Hz)      | 4496.40 |
| Solvent                | DMSO-d6              | Spectrum Offset (Hz) | 1096.1024                                             | Spectrum Type        | STANDARD | Sweep Width (Hz)     | 4496.37 | Temperature (degree C) | 22.160  |

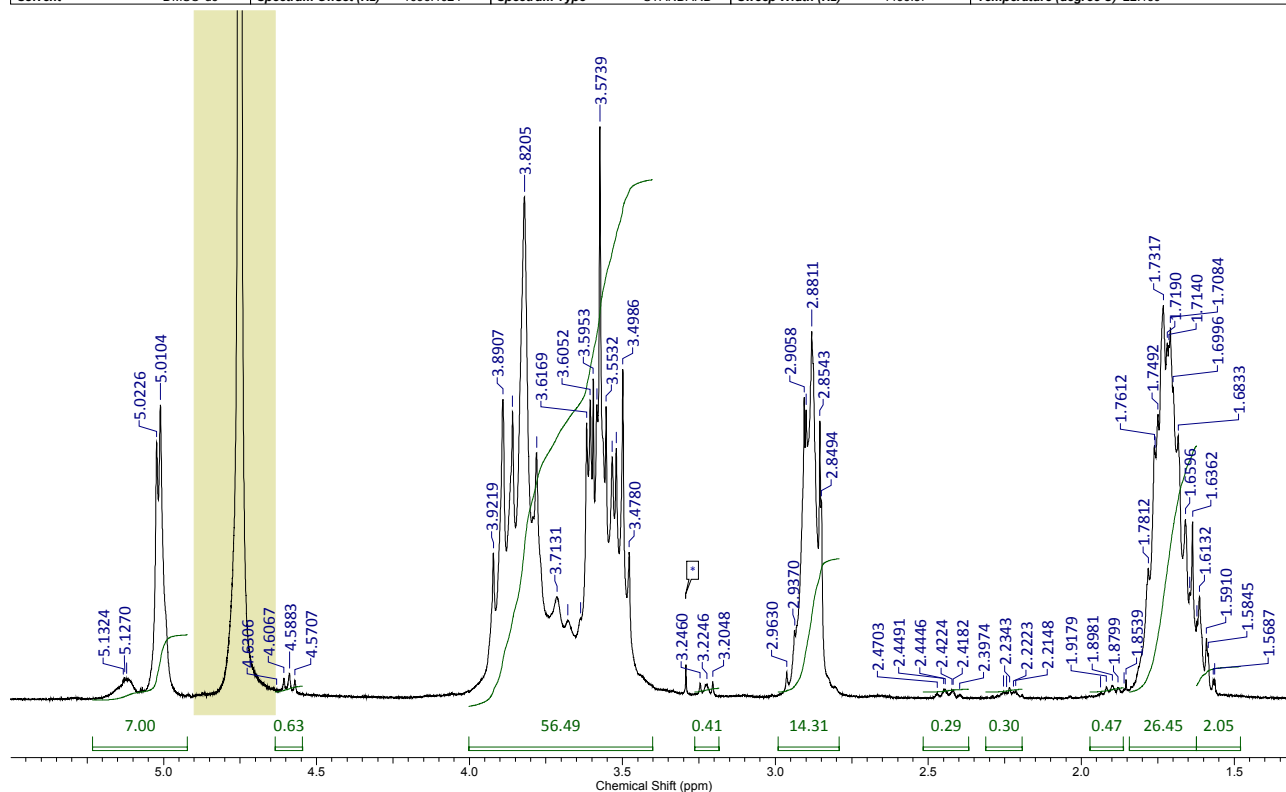

Figure S 49: Proton NMR spectrum of sulfobutylated  $\beta$ CD (4') prepared in ball mill (item 14 in Table 1), DS  $\approx$  6.2-6.6

|                        |                                                       |                        |                                 |                       |           |                      |           |
|------------------------|-------------------------------------------------------|------------------------|---------------------------------|-----------------------|-----------|----------------------|-----------|
| Acquisition Time (sec) | (0.0427, 0.0051)                                      | Comment                | 5 mm BBO 1H-BB Z-GRD Z6284/0059 |                       | Date      | 28 Sep 2016 13:48:32 |           |
| File Name              | D:\Docs\1\Notebooks\BM_Reactions\NMR\SBBCD_LJ03\2.ser | Frequency (MHz)        | (300.13, 75.47)                 |                       | Nucleus   | (1H, 13C)            |           |
| Number of Transients   | 32                                                    | Origin                 | spect                           | Original Points Count | (128, 64) | Owner                | psm       |
| Points Count           | (512, 256)                                            | Pulse Sequence         | hsgcdetgp                       | Solvent               | DMSO      | Spectrum Type        | HSQC-DEPT |
| Sweep Width (Hz)       | (2991.75, 12451.17)                                   | Temperature (degree C) | 22.260                          |                       |           |                      |           |

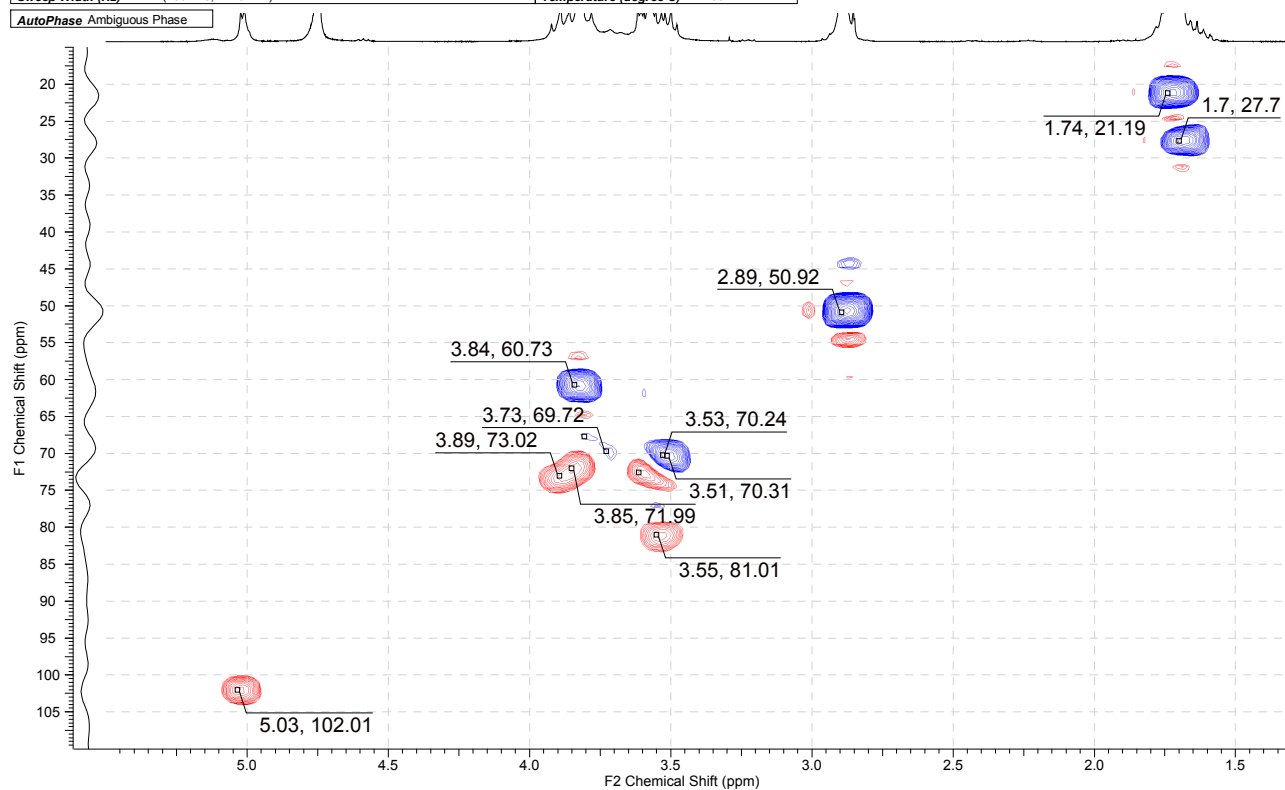

Figure S 50: HSQC-DEPT spectrum of sulfobutylated  $\beta$ CD (4') prepared in ball mill (item 14 in Table 1), DS  $\approx$  6.2-6.6

|                        |                      |                      |                                                       |                      |                      |
|------------------------|----------------------|----------------------|-------------------------------------------------------|----------------------|----------------------|
| Acquisition Time (sec) | 3.6438               | Comment              | SBBCD_LJ04 (20mg in 0.6ml D2O)                        | Date                 | 30 Sep 2016 11:53:04 |
| Date Stamp             | 30 Sep 2016 11:53:04 | File Name            | D:\Docs\1\Notebooks\BM_Reactions\NMR\SBBCD_LJ04\1\fid |                      |                      |
| Frequency (MHz)        | 300.13               | Nucleus              | 1H                                                    | Number of Transients | 64                   |
| Origin                 | root                 | Points Count         | 131072                                                | Origin               | spect                |
| Owner                  | root                 | Pulse Sequence       | zg                                                    | Receiver Gain        | 90.50                |
| Solvent                | DEUTERIUM OXIDE      | Spectrum Offset (Hz) | 1096.2106                                             | SW(cyclical) (Hz)    | 4496.40              |
| Temperature (degree C) | 22.260               |                      |                                                       | Spectrum Type        | STANDARD             |
|                        |                      |                      |                                                       | Sweep Width (Hz)     | 4496.37              |

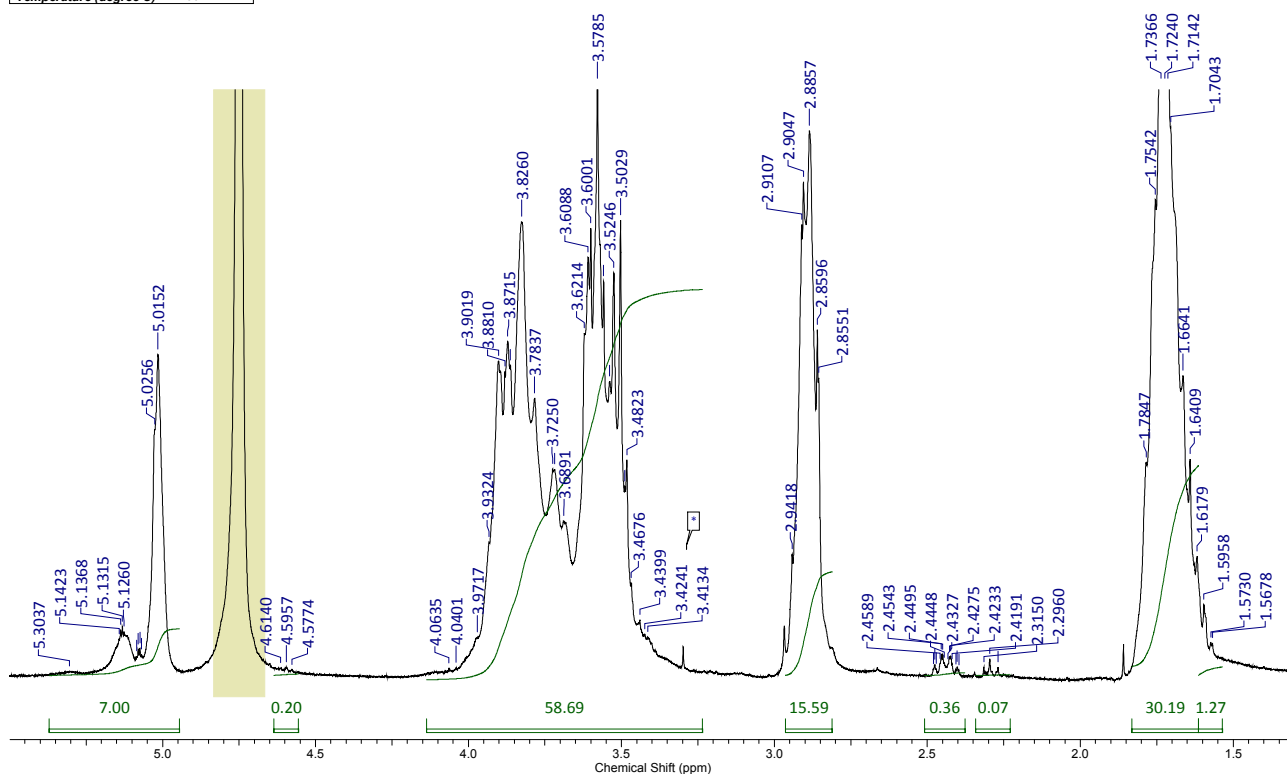

Figure S 51: Proton NMR spectrum of sulfobutylated  $\beta$ CD ( $4'$ ) prepared in ball mill (item 15 in Table 1),  $DS \approx 7.5-7.8$

|                        |                                                       |                        |                                 |                       |                      |
|------------------------|-------------------------------------------------------|------------------------|---------------------------------|-----------------------|----------------------|
| Acquisition Time (sec) | (0.0427, 0.0051)                                      | Comment                | 5 mm BBO 1H-BB Z-GRD Z8284/0059 | Date                  | 30 Sep 2016 12:46:28 |
| File Name              | D:\Docs\1\Notebooks\BM_Reactions\NMR\SBBCD_LJ04\2\ser | Frequency (MHz)        | (300.13, 75.47)                 | Nucleus               | (1H, 13C)            |
| Number of Transients   | 32                                                    | Origin                 | spect                           | Original Points Count | (128, 64)            |
| Points Count           | (512, 256)                                            | Pulse Sequence         | hsqcetp                         | Owner                 | psm                  |
| Sweep Width (Hz)       | (2991.75, 12451.17)                                   | Solvent                | DMSO                            | Spectrum Type         | HSQC-DEPT            |
|                        |                                                       | Temperature (degree C) | 22.260                          |                       |                      |

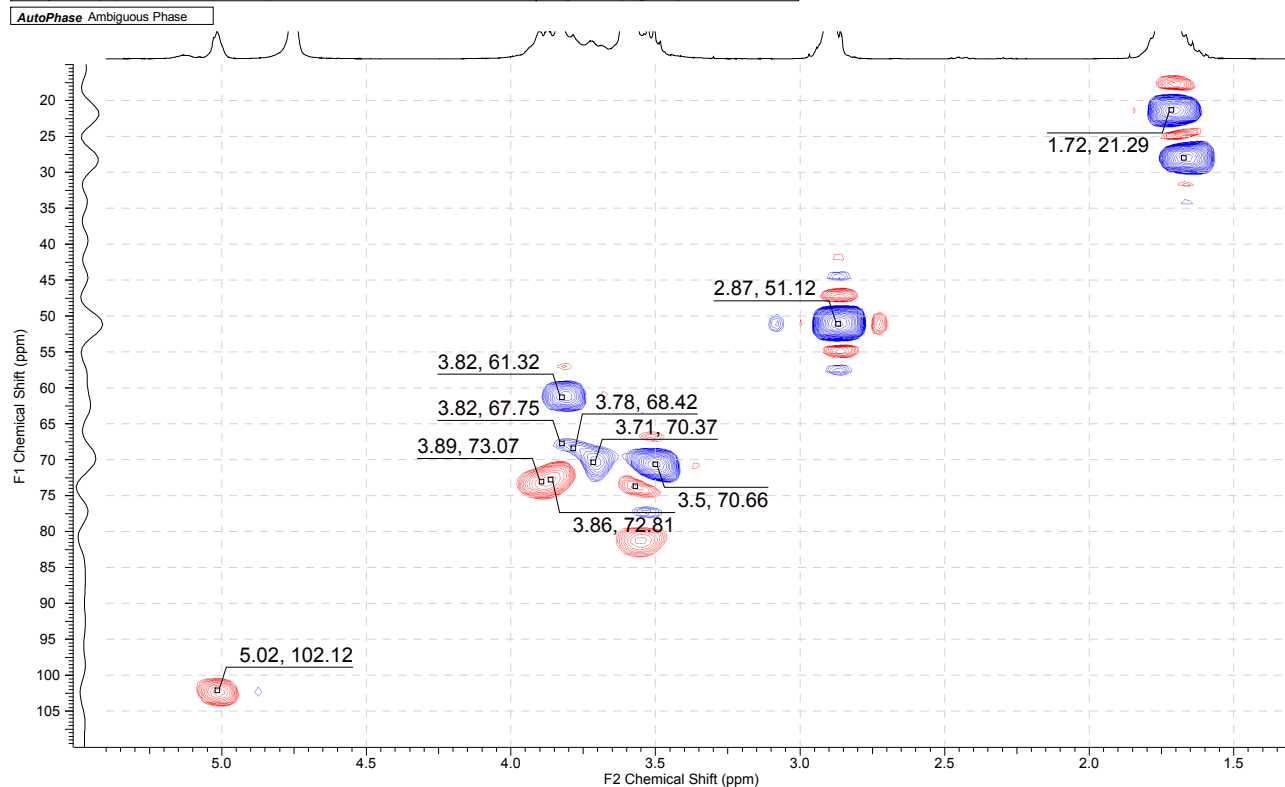

Figure S 52: HSQC-DEPT spectrum of sulfobutylated  $\beta$ CD ( $4'$ ) prepared in ball mill (item 15 in Table 1),  $DS \approx 7.5-7.8$

|                        |                      |                      |                                                      |                        |                      |
|------------------------|----------------------|----------------------|------------------------------------------------------|------------------------|----------------------|
| Acquisition Time (sec) | 3.6438               | Comment              | SBBCD-LJ05 1H D2O 031016 2033 RG=90                  | Date                   | 03 Oct 2016 10:12:48 |
| Date Stamp             | 03 Oct 2016 10:12:48 | File Name            | D:\Docs\1\Notebooks\BM_Reactions\NMR\SBBCD-LJ05\1fid |                        |                      |
| Frequency (MHz)        | 300.13               | Nucleus              | 1H                                                   | Number of Transients   | 58                   |
| Owner                  | root                 | Points Count         | 131072                                               | Pulse Sequence         | zg                   |
| Solvent                | CDCI3                | Spectrum Offset (Hz) | 1096.2448                                            | Spectrum Type          | STANDARD             |
|                        |                      |                      |                                                      | Receiver Gain          | 90.50                |
|                        |                      |                      |                                                      | Sweep Width (Hz)       | 4496.37              |
|                        |                      |                      |                                                      | Original Points Count  | 16384                |
|                        |                      |                      |                                                      | SW(cyclical) (Hz)      | 4496.40              |
|                        |                      |                      |                                                      | Temperature (degree C) | 21.760               |

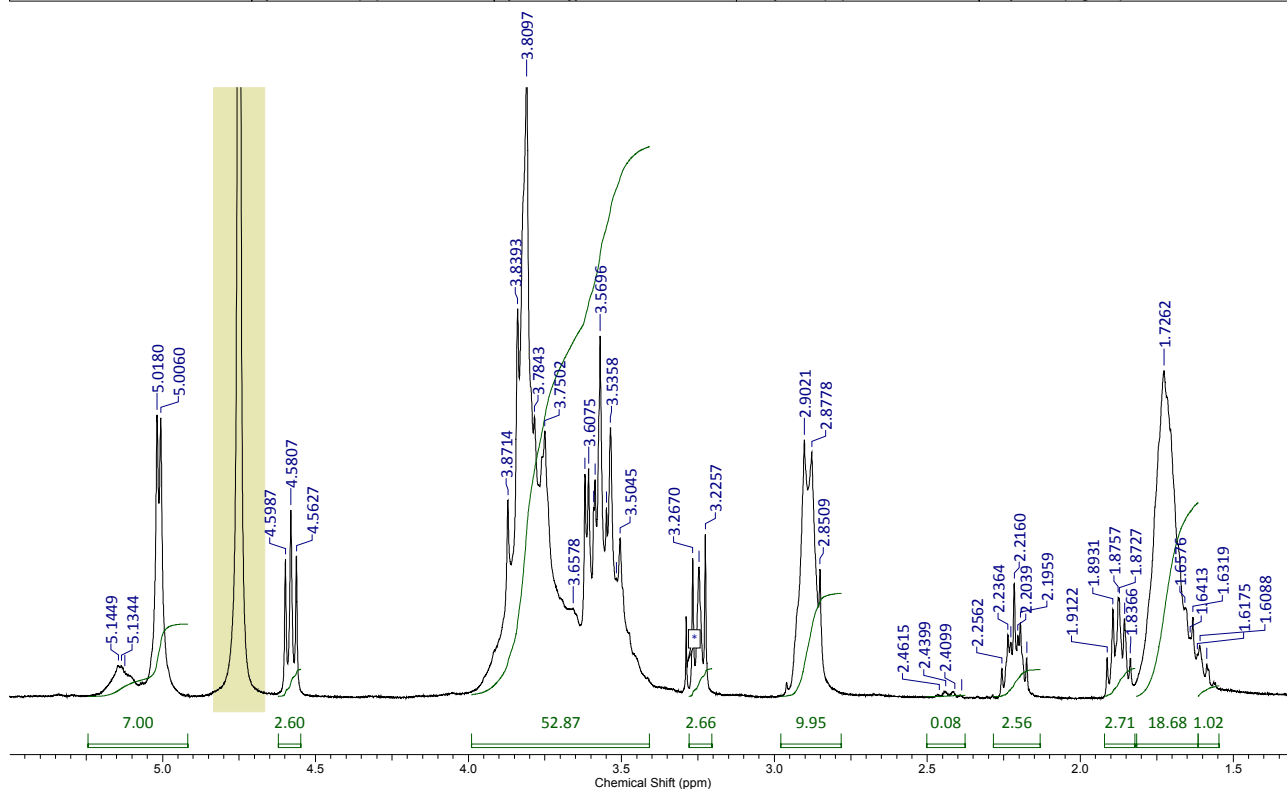

Figure S 53: Proton NMR spectrum of sulfobutylated  $\beta$ CD (4') prepared in ball mill (item 16 in Table 1), DS  $\approx$  4.4-4.9

|                        |                                              |                        |                                 |                       |                                       |
|------------------------|----------------------------------------------|------------------------|---------------------------------|-----------------------|---------------------------------------|
| Acquisition Time (sec) | (0.0427, 0.0051)                             | Comment                | 5 mm BBO 1H-BB Z-GRD Z8284/0059 | Date                  | 04 Oct 2016 14:22:56                  |
| File Name              | E:\doc\1\molecules\Anal\NMR\SBBCD_LJ05\2\ser | Frequency (MHz)        | (300.13, 75.47)                 | Nucleus               | (1H, 13C)                             |
| Number of Transients   | 32                                           | Origin                 | spect                           | Original Points Count | (128, 64)                             |
| Points Count           | (1024, 256)                                  | Pulse Sequence         | hsqcetdgp                       | Solvent               | DMSO                                  |
| Sweep Width (Hz)       | (2994.67, 12451.17)                          | Temperature (degree C) | 22.560                          | Title                 | SBBCD-LJ05 HSQC D2O 031016 2033 RG=90 |
|                        |                                              |                        |                                 | Spectrum Type         | HSQC-DEPT                             |

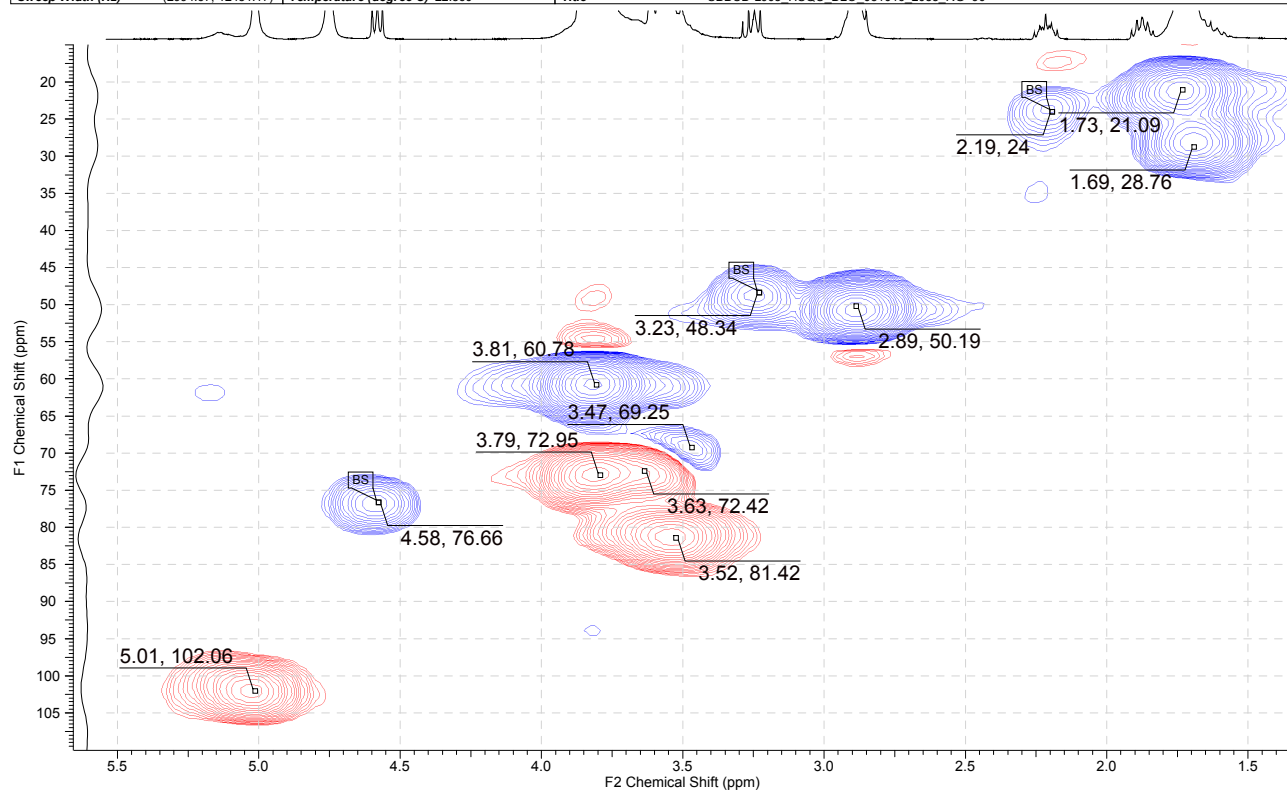

Figure S 54: HSQC-DEPT spectrum of sulfobutylated  $\beta$ CD (4') prepared in ball mill (item 16 in Table 1), DS  $\approx$  4.4-4.9

|                        |                      |                      |                                                       |                        |                      |
|------------------------|----------------------|----------------------|-------------------------------------------------------|------------------------|----------------------|
| Acquisition Time (sec) | 3.6438               | Comment              | SBBCD_LJ06_1H_D2O_061016_2045_rg=110                  | Date                   | 06 Oct 2016 15:30:40 |
| Date Stamp             | 06 Oct 2016 15:30:40 | File Name            | D:\Docs\1\Notebooks\BM_Reactions\NMR\SBBCD-LJ06\1.tif |                        |                      |
| Frequency (MHz)        | 300.13               | Nucleus              | 1H                                                    | Number of Transients   | 64                   |
| Owner                  | root                 | Points Count         | 131072                                                | Origin                 | spect                |
| Solvent                | CDCI3                | Spectrum Offset (Hz) | 1096.3082                                             | Receiver Gain          | 114.00               |
|                        |                      | Spectrum Type        | STANDARD                                              | SW(cyclical) (Hz)      | 4496.40              |
|                        |                      |                      |                                                       | Sweep Width (Hz)       | 4496.37              |
|                        |                      |                      |                                                       | Temperature (degree C) | 21.560               |

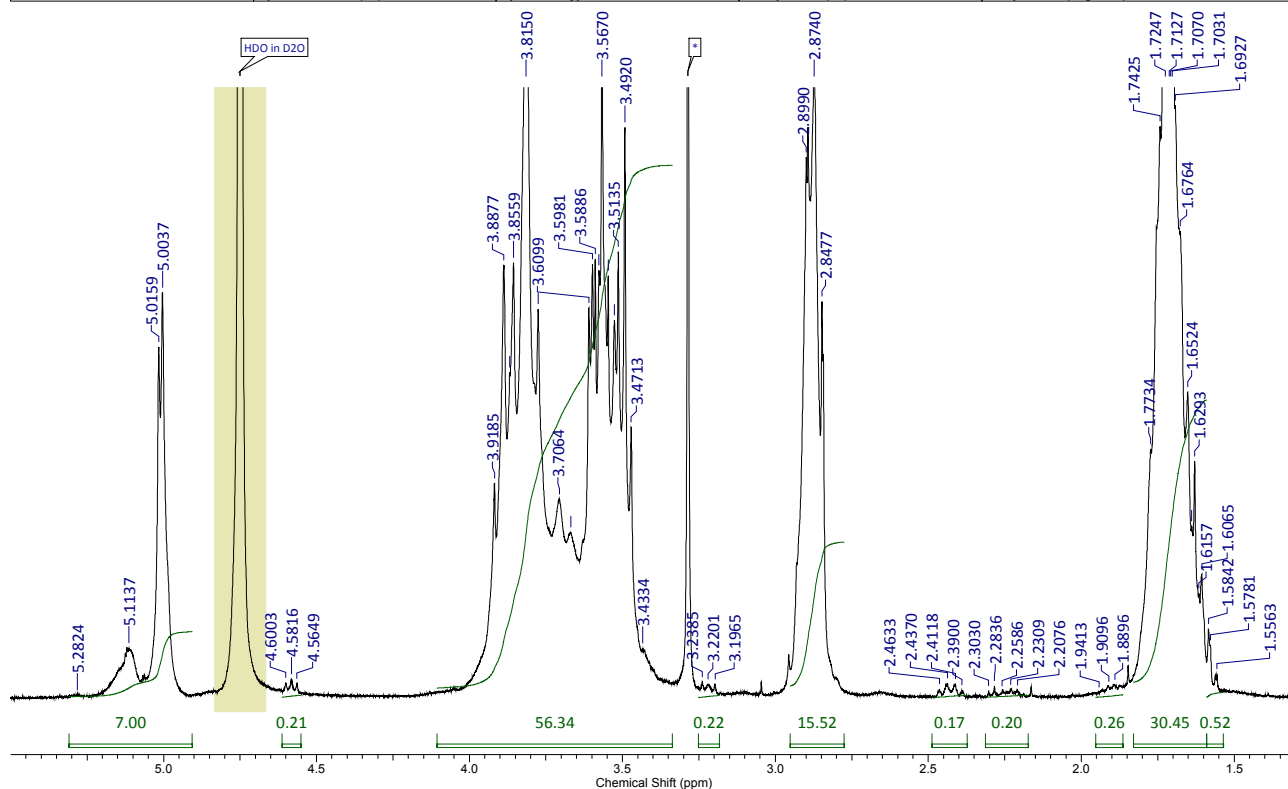

Figure S 55: Proton NMR spectrum of sulfobutylated  $\beta$ CD (4') prepared in ball mill (item 17 in Table 1), DS  $\approx$  6.9-7.5

|                        |                                               |                        |                                 |                       |                                        |
|------------------------|-----------------------------------------------|------------------------|---------------------------------|-----------------------|----------------------------------------|
| Acquisition Time (sec) | (0.0427, 0.0051)                              | Comment                | 5 mm BBO 1H-BB Z-GRD Z8284/0059 | Date                  | 06 Oct 2016 15:01:30                   |
| File Name              | E:\docs\1\molecules\Anal\NMR\SBBCD-LJ06\2\ser |                        |                                 | Frequency (MHz)       | (300.13, 75.47)                        |
| Number of Transients   | 32                                            | Origin                 | spect                           | Original Points Count | (128, 64)                              |
| Points Count           | (512, 512)                                    | Pulse Sequence         | hsqcetdgp                       | Solvent               | DMSO                                   |
| Sweep Width (Hz)       | (2991.75, 12475.59)                           | Temperature (degree C) | 21.560                          | Title                 | SBBCD_LJ06_HSQC_D2O_061016_2045_rg=110 |
|                        |                                               |                        |                                 | Nucleus               | (1H, 13C)                              |
|                        |                                               |                        |                                 | Owner                 | psm                                    |
|                        |                                               |                        |                                 | Spectrum Type         | HSQC-DEPT                              |

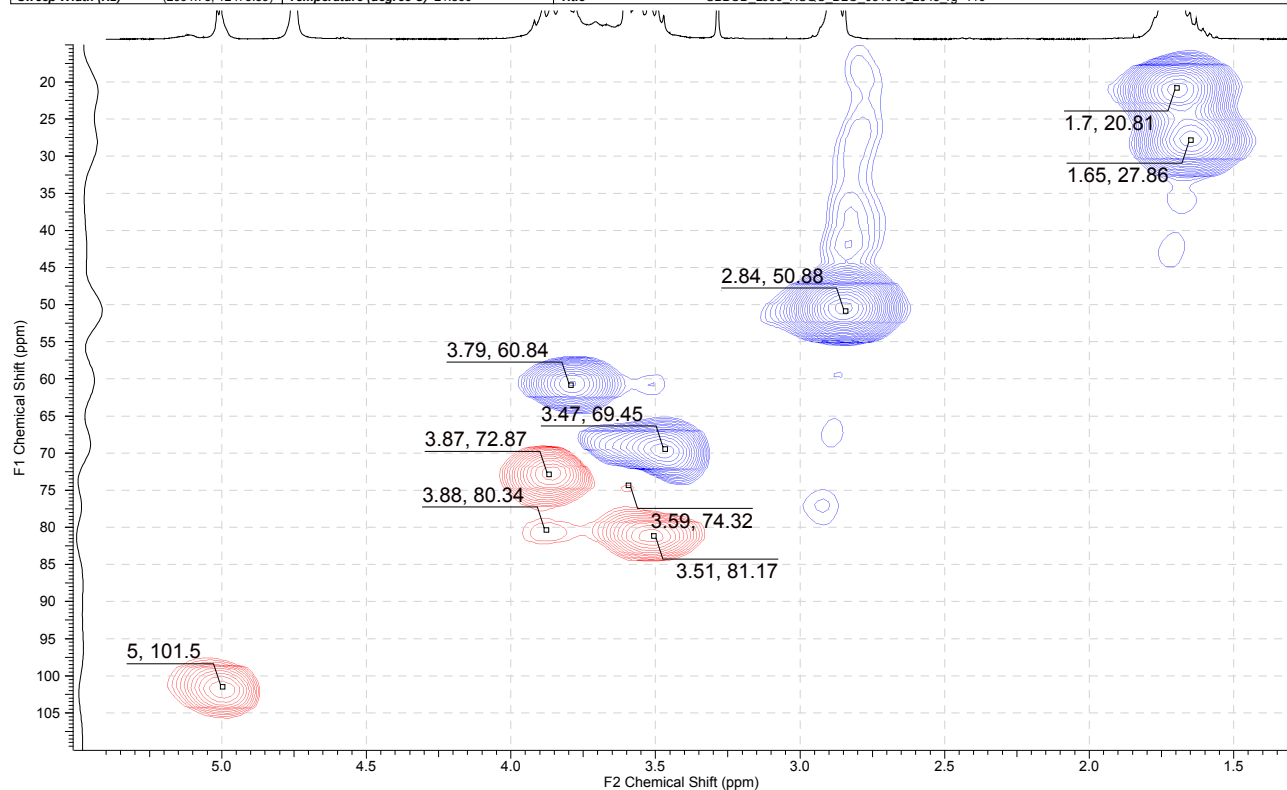

Figure S 56: HSQC-DEPT spectrum of sulfobutylated  $\beta$ CD (4') prepared in ball mill (item 17 in Table 1), DS  $\approx$  6.9-7.5

|                        |                      |                      |                                               |                        |                      |
|------------------------|----------------------|----------------------|-----------------------------------------------|------------------------|----------------------|
| Acquisition Time (sec) | 3.6438               | Comment              | HOBSANA 1H D2O 120117 2122 RG=180 8 mg/0.8 ml | Date                   | 13 Jan 2017 08:08:48 |
| Date Stamp             | 13 Jan 2017 08:08:48 | File Name            | E:\Documents\1\Molecules\Anal\HOBSANA\1\fid   | Frequency (MHz)        | 300.13               |
| Nucleus                | 1H                   | Number of Transients | 64                                            | Origin                 | spect                |
| Points Count           | 131072               | Pulse Sequence       | zg                                            | Original Points Count  | 16384                |
| Spectrum Offset (Hz)   | 1096.6907            | Spectrum Type        | STANDARD                                      | Receiver Gain          | 181.00               |
|                        |                      |                      |                                               | SW(cyclical) (Hz)      | 4496.40              |
|                        |                      |                      |                                               | Solvent                | CHLOROFORM-d         |
|                        |                      |                      |                                               | Sweep Width (Hz)       | 4496.37              |
|                        |                      |                      |                                               | Temperature (degree C) | 20.260               |

| No. | Shift1 (ppm) | H's | Type | J (Hz)     | Multiplet1 | (ppm)          |
|-----|--------------|-----|------|------------|------------|----------------|
| 1   | 1.59         | 23  | dd   | 6.40, 6.30 | beta       | [1.54 .. 1.65] |
| 2   | 1.71         | 14  | dddd | 8.00, 7.90 | gamma      | [1.65 .. 1.78] |
| 3   | 2.86         | 24  | dd   | 7.80       | delta      | [2.81 .. 2.92] |
| 4   | 3.55         | 24  | dd   | 6.30       | alpha      | [3.51 .. 3.61] |

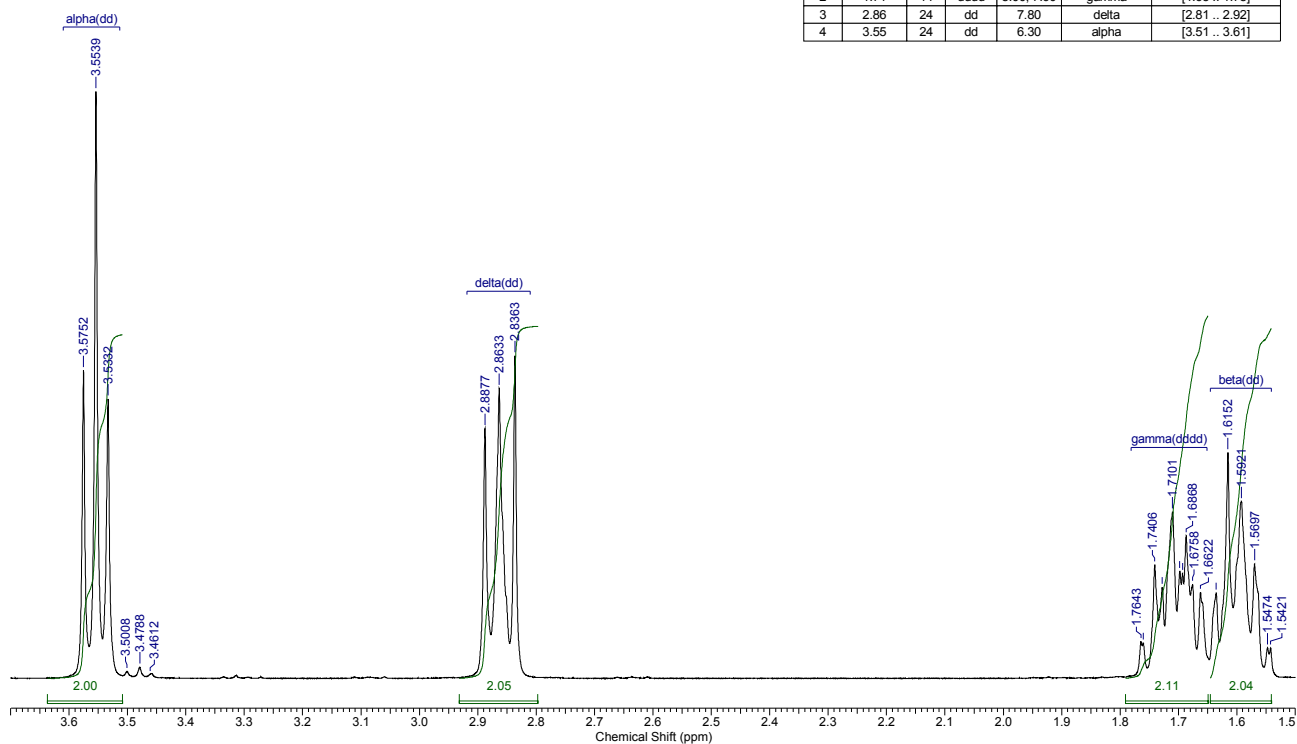

Figure S 57: Proton NMR spectrum of 4-hydroxy-1-butananesulfonic acid sodium salt (HOBSANa)

|                        |                                             |                        |                                                 |                       |                      |
|------------------------|---------------------------------------------|------------------------|-------------------------------------------------|-----------------------|----------------------|
| Acquisition Time (sec) | (0.0427, 0.0051)                            | Comment                | 5 mm BBO 1H-BB Z-GRD Z8284/0059                 | Date                  | 13 Jan 2017 09:02:26 |
| File Name              | E:\Documents\1\Molecules\Anal\HOBSANA\2\ser | Frequency (MHz)        | (300.13, 75.47)                                 | Nucleus               | (1H, 13C)            |
| Number of Transients   | 32                                          | Origin                 | spect                                           | Original Points Count | (128, 64)            |
| Points Count           | (1024, 512)                                 | Pulse Sequence         | hsqcdeptgp                                      | Solvent               | DMSO                 |
| Sweep Width (Hz)       | (2994.67, 12475.59)                         | Temperature (degree C) | 20.360                                          | Spectrum Type         | HSQC-DEPT            |
|                        |                                             | Title                  | HOBSANA HSQC D2O 120117 2122 RG=180 8 mg/0.8 ml |                       |                      |

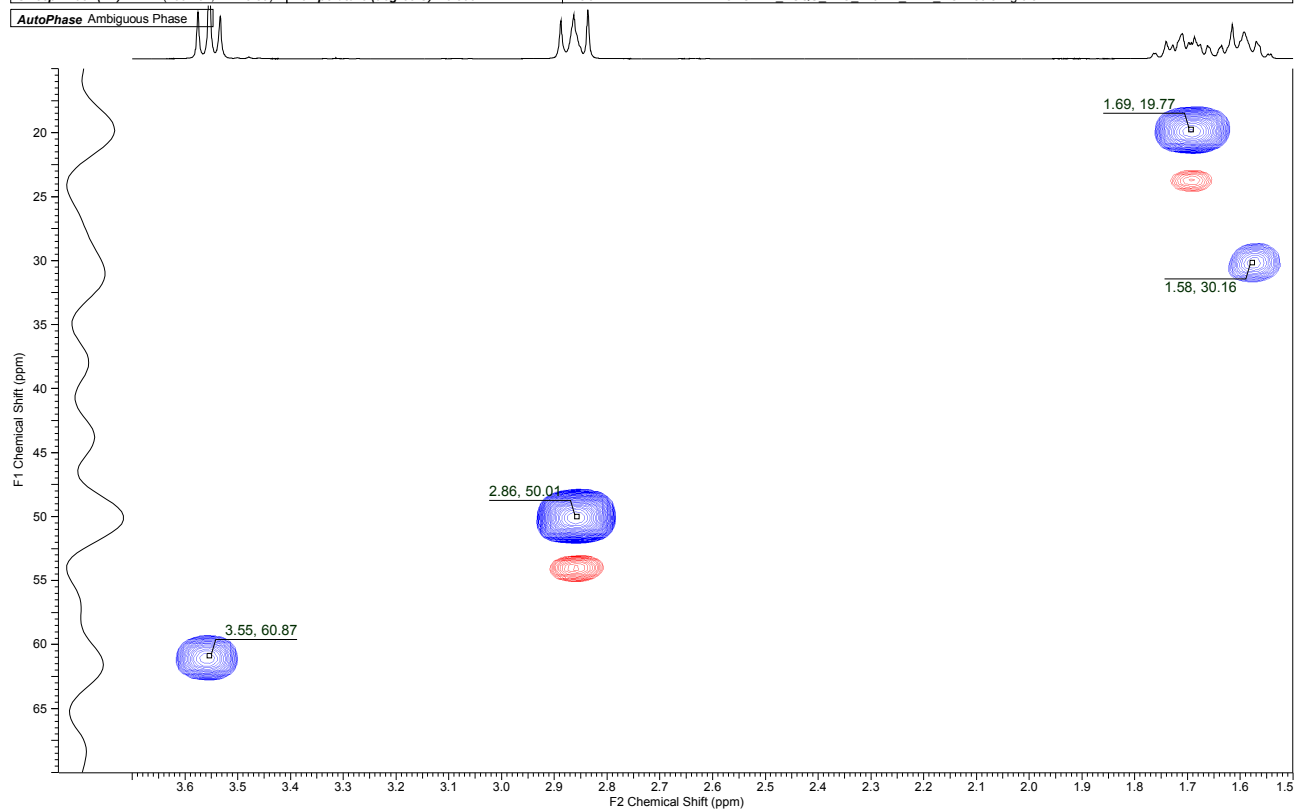

Figure S 58: HSQC-DEPT spectrum of HOBSANa

|                        |                      |                      |                                               |                        |                      |
|------------------------|----------------------|----------------------|-----------------------------------------------|------------------------|----------------------|
| Acquisition Time (sec) | 3.6438               | Comment              | BIBSANA 1H D2O 130117_2123_RG=180 8 mg/0.8 ml | Date                   | 13 Jan 2017 09:14:56 |
| Date Stamp             | 13 Jan 2017 09:14:56 | File Name            | E:\Documents\1\Molecules\Anal\BIBSANA\1fid    | Frequency (MHz)        | 300.13               |
| Nucleus                | 1H                   | Number of Transients | 64                                            | Origin                 | spect                |
| Points Count           | 131072               | Pulse Sequence       | zg                                            | Receiver Gain          | 181.00               |
| Spectrum Offset (Hz)   | 1096.5878            | Spectrum Type        | STANDARD                                      | Sweep Width (Hz)       | 4496.37              |
|                        |                      |                      |                                               | Temperature (degree C) | 20.460               |

| No. | Shift1 (ppm) | H's | Type | J (Hz) | Multiplet1 | (ppm)          |
|-----|--------------|-----|------|--------|------------|----------------|
| 1   | 1.62         | 2   | m    | -      | beta       | [1.57 .. 1.67] |
| 2   | 1.71         | 2   | m    | -      | gamma      | [1.67 .. 1.77] |
| 3   | 2.86         | 24  | dd   | 7.80   | delta      | [2.82 .. 2.91] |
| 4   | 3.48         | 24  | dd   | 6.30   | alpha      | [3.43 .. 3.53] |

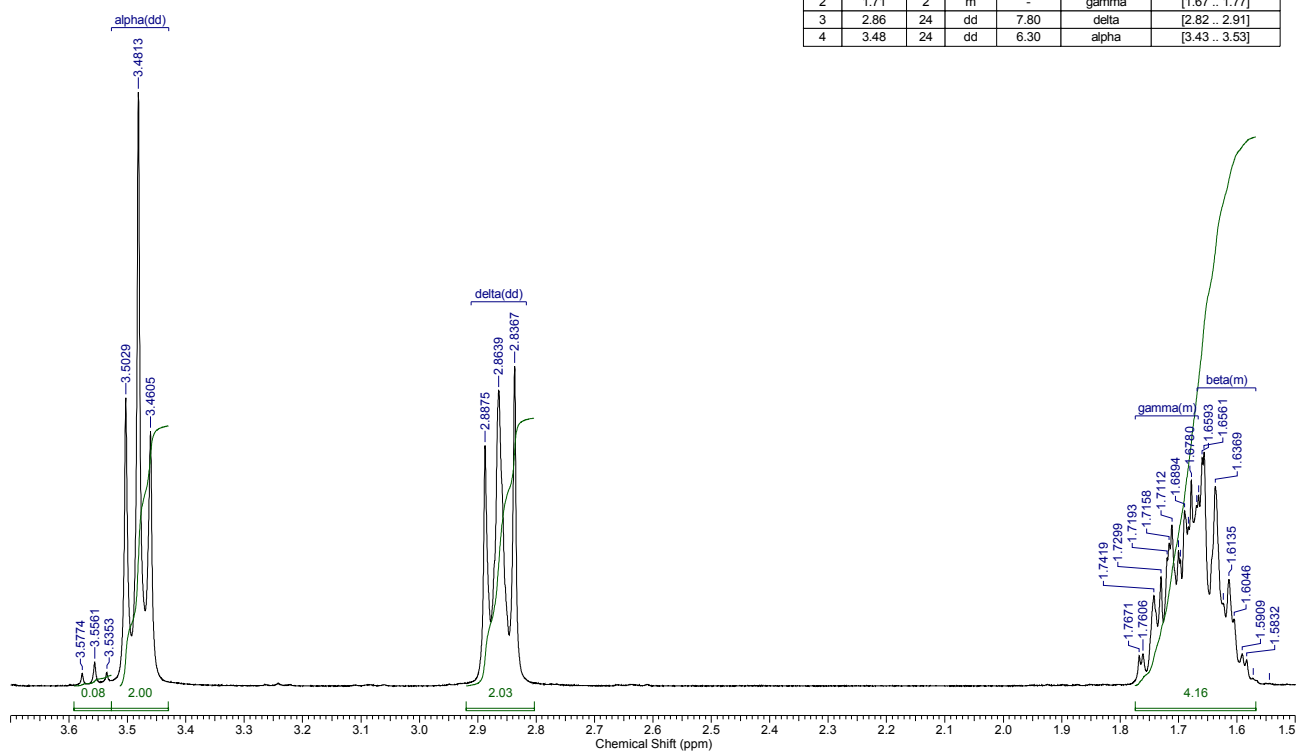

Figure S 59: Proton NMR spectrum of di(1,1'-sulfonatobutyl)ether disodium salt (disodium 4,4'-oxydibutane-1,1'-disulfonate, BIBSANA)

|                        |                                             |                        |                                 |                       |                                                 |
|------------------------|---------------------------------------------|------------------------|---------------------------------|-----------------------|-------------------------------------------------|
| Acquisition Time (sec) | (0.0427, 0.0051)                            | Comment                | 5 mm BBO 1H-BB Z-GRD Z8284/0059 | Date                  | 13 Jan 2017 10:10:04                            |
| File Name              | E:\Documents\1\Molecules\Anal\BIBSANA\2\ser | Frequency (MHz)        | (300.13, 75.47)                 | Nucleus               | (1H, 13C)                                       |
| Number of Transients   | 32                                          | Origin                 | spect                           | Original Points Count | (128, 64)                                       |
| Points Count           | (1024, 512)                                 | Pulse Sequence         | hsqcadelgp                      | Solvent               | DMSO                                            |
| Sweep Width (Hz)       | (2994.67, 12475.59)                         | Temperature (degree C) | 20.560                          | Title                 | BIBSANA HSQC D2O 130117_2123_RG=180 8 mg/0.8 ml |

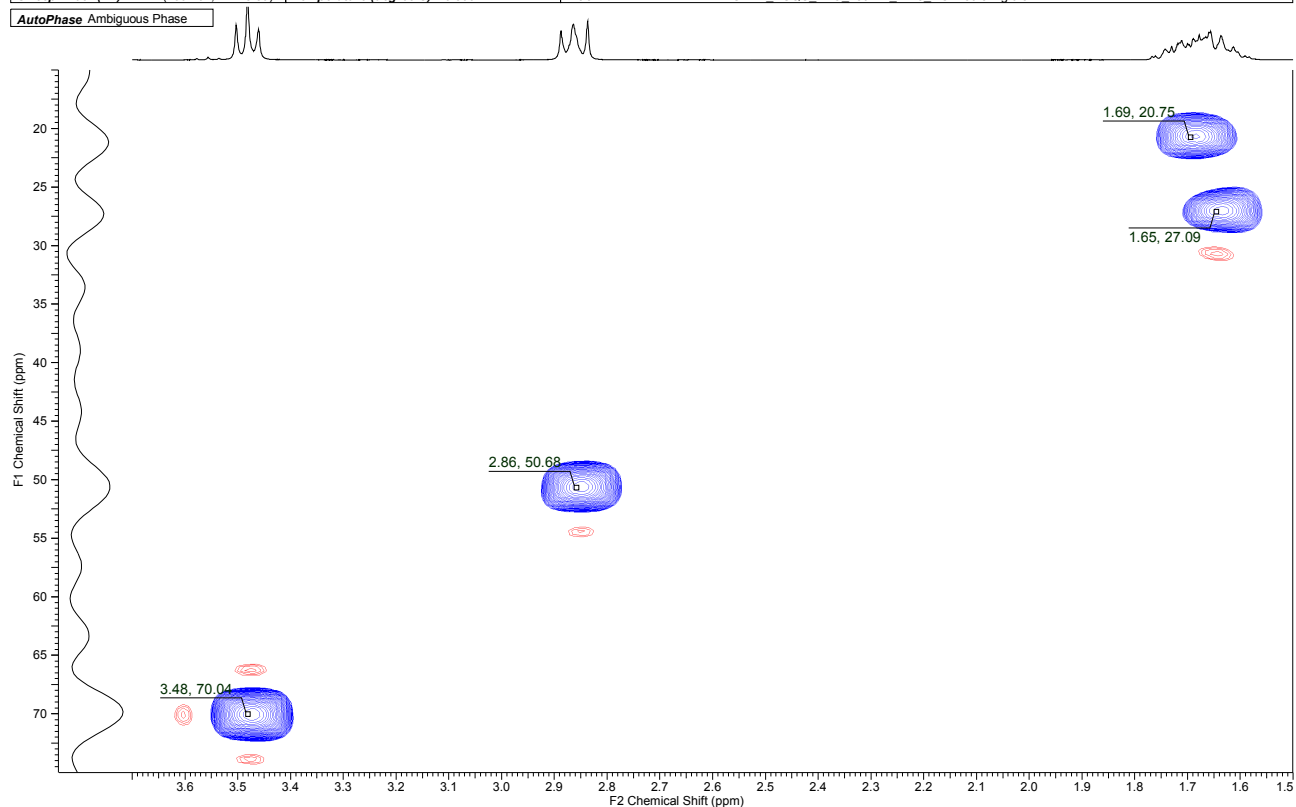

Figure S 60: HSQC-DEPT spectrum of BIBSANA

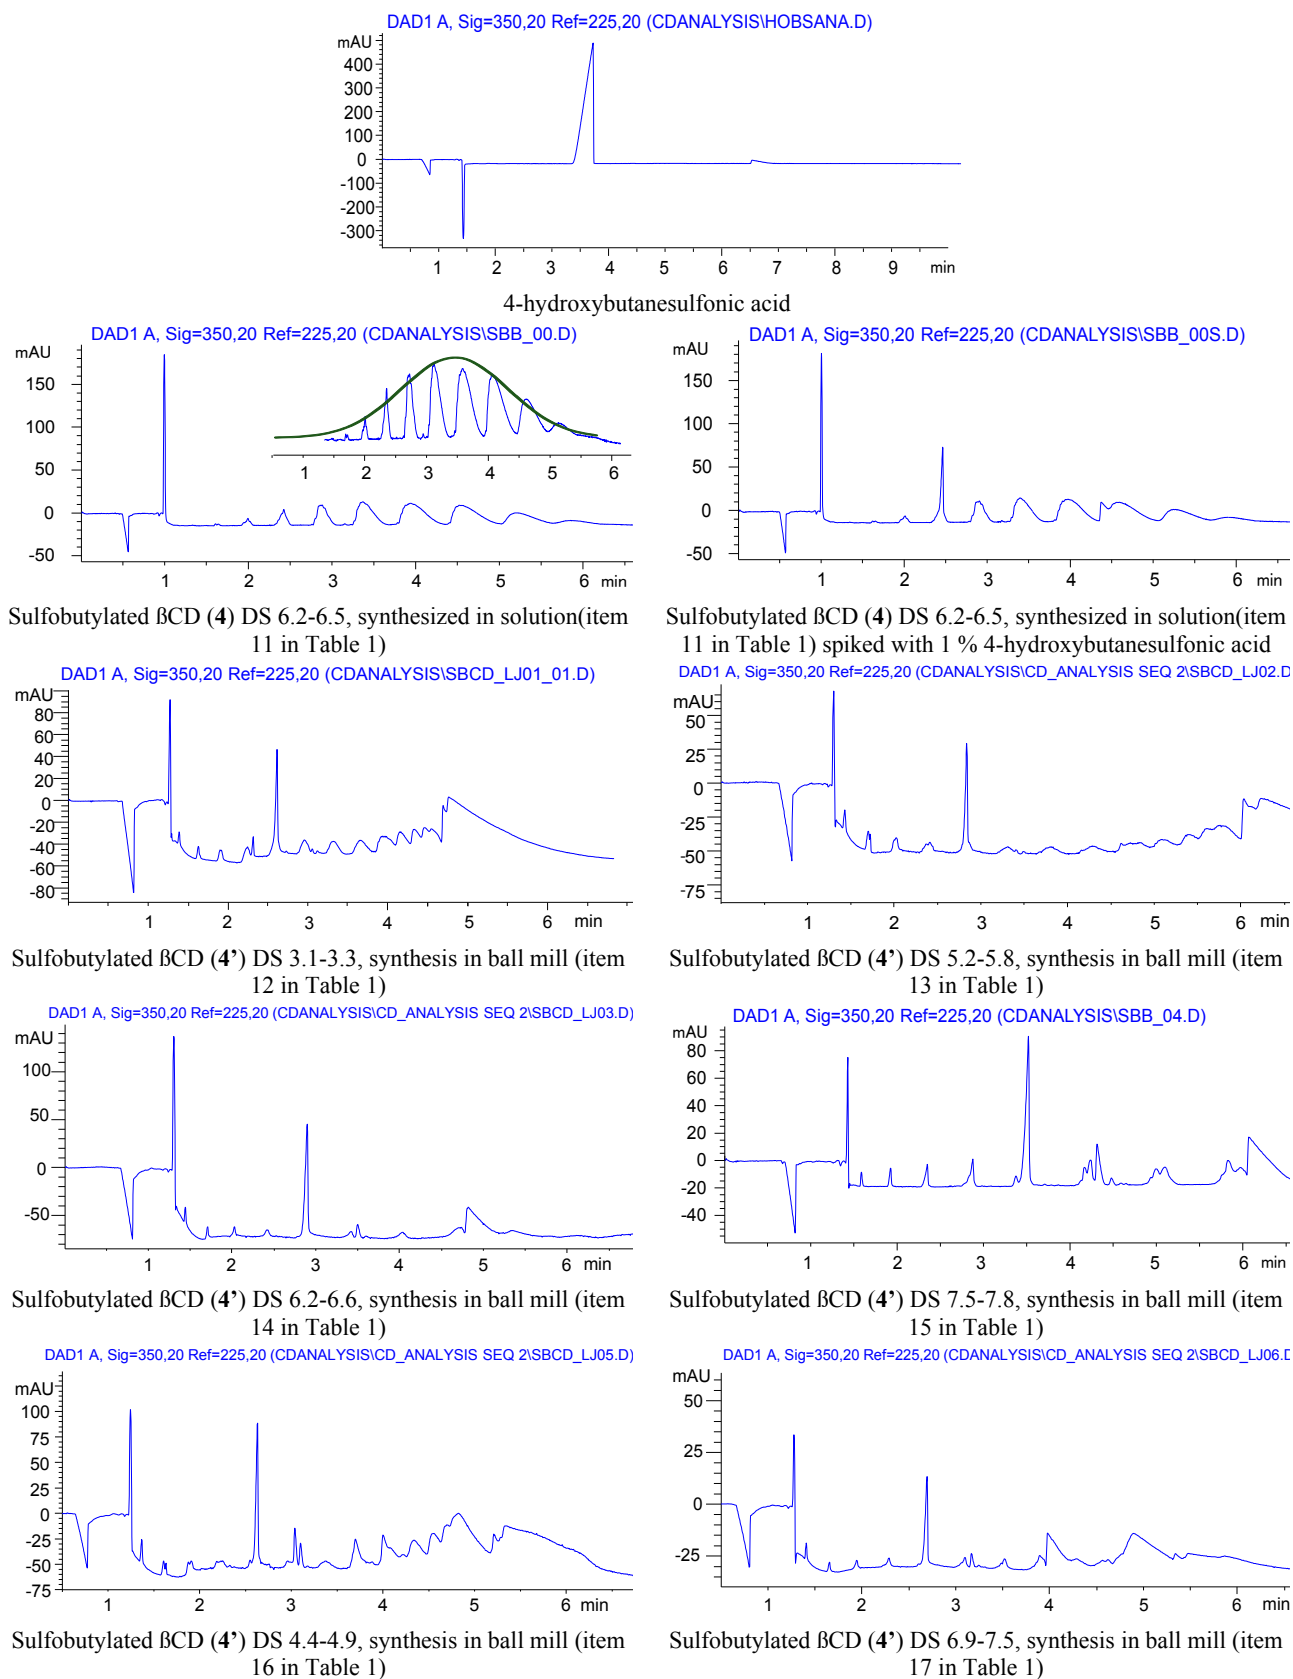

Figure S 61: Capillary electropherogram of sulfobutylated  $\beta$ CDs

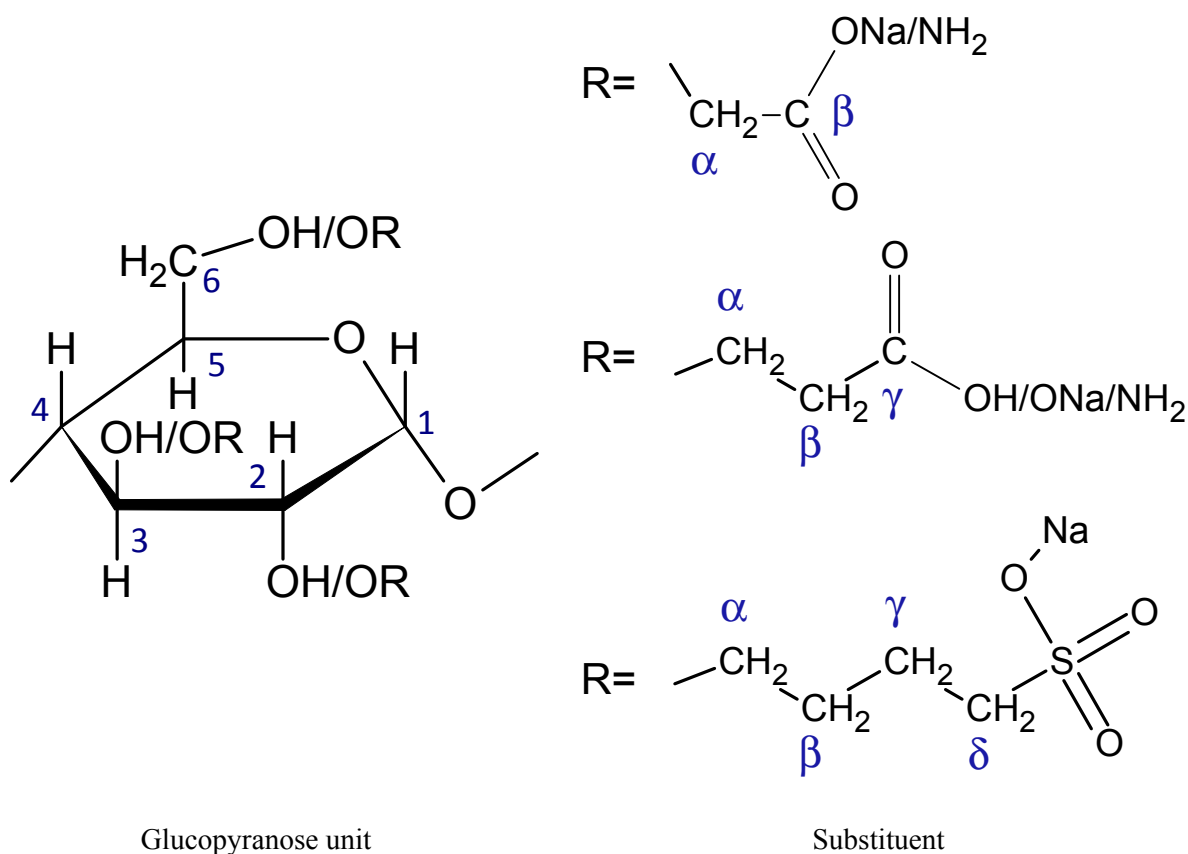

Scheme 1

*Scheme S 1: Carbon atom numbering for the NMR assignment (OH: unsubstituted; OR: substituted)*

*Table S 1: Proton assignment of cyclodextrin derivatives prepared in solution (based on <sup>1</sup>H- and HSQC-DEPT experiments)*

|                            | Compound 2<br>(CMβCD) <sup>1</sup> | Compound 3<br>(CEβCD) <sup>2</sup> | Compound 5<br>(CAMβCD) <sup>3</sup> | Compound 4<br>(SBβCD) <sup>4</sup> | HOBSANa <sup>5</sup> | BIBSANA <sup>6</sup> |
|----------------------------|------------------------------------|------------------------------------|-------------------------------------|------------------------------------|----------------------|----------------------|
| C(1)H <sup>7</sup>         | 5.00, 5.21                         | 4.99                               | 4.97, 4.99                          | 5.02, 5.11                         | --                   | --                   |
| C(2)H unsubst              | 3.54-3.61                          | 3.56-3.68                          | 3.41-3.63                           | 3.48-3.61                          | --                   | --                   |
| C(2)H subst <sup>8</sup>   | 3.34-3.63                          | 3.43-3.59                          | 3.38-3.60                           | 3.57-3.67                          | --                   | --                   |
| C(3)H unsubst <sup>8</sup> | 3.84-4.04                          | 3.79-3.96                          | 3.63-3.98                           | 3.70-3.90                          | --                   | --                   |
| C(3)H subst                | --                                 | --                                 | --                                  | 3.70-3.83                          | --                   | --                   |
| C(4)H <sup>8</sup>         | 3.44-3.62                          | 3.43-3.59                          | 3.38-3.60                           | 3.40-3.57                          | --                   | --                   |
| C(5)H <sup>8</sup>         | 3.69-3.88                          | 3.73-3.92                          | 3.63-3.98                           | 3.76-3.90                          | --                   | --                   |
| C(6)H2 unsubst             | 3.70-3.91                          | 3.70-3.89                          | 3.61-3.93                           | 3.71-3.90                          | --                   | --                   |
| C(6)H2 subst               | --                                 | 3.72-3.81(?)                       | --                                  | 3.65-3.73                          | --                   | --                   |
| alpha to -O                | 3.86-3.95;<br>4.03-4.21            | 3.62-3.74                          | 3.61-3.77                           | 3.43-3.54                          | 3.55                 | 3.48                 |
| beta to -O                 | --                                 | 2.35-2.46                          | 2.38-2.51                           | 1.67                               | 1.58                 | 1.65                 |
| gamma to -O                | --                                 | --                                 | --                                  | 1.71                               | 1.69                 | 1.69                 |
| delta to -O                | --                                 | --                                 | --                                  | 2.86                               | 2.86                 | 2.86                 |

<sup>1</sup> CM= Carboxymethyl; <sup>2</sup> CE=Carboxyethyl; <sup>3</sup> CAM=Carbamoyl ethyl; <sup>4</sup> SB=Sulfobutyl; <sup>5</sup> HOBSANa=4-hydroxybutanesulfonic acid sodium salt; <sup>6</sup> BIBSANA: di(1,1'-sulfonatolbutyl)ether disodium salt (disodium 4,4'-oxydibutane-1,1'-disulfonate); <sup>7</sup> main peaks only; <sup>8</sup> shaded assignments may be altered



Table S 2: Carbon assignment of cyclodextrin derivatives prepared in solution (based on <sup>13</sup>C- and HSQC-DEPT experiments)

|                            | Compound 2<br>(CMβCD) <sup>1</sup> | Compound 3<br>(CEβCD) <sup>2</sup> | Compound 5<br>(CAMβCD) <sup>3</sup> | Compound 4<br>(SBβCD) <sup>4</sup> | HOBSANa <sup>5</sup> | BIBSANA <sup>6</sup> |
|----------------------------|------------------------------------|------------------------------------|-------------------------------------|------------------------------------|----------------------|----------------------|
| C1 <sup>7</sup>            | 100.3, 102.0                       | 102.1                              | 103.1                               | 99.2, 101.1                        | --                   | --                   |
| C2 unsubst                 | 72.6                               | 72.0                               | 71.9                                | 72.5                               | --                   | --                   |
| C2 subst <sup>8</sup>      | 81.1                               | 80.7                               | 81.4                                | 78.3-80.4                          | --                   | --                   |
| C3 unsubst <sup>7,8</sup>  | 72.2, 73.8                         | 73.3, 71.1                         | 72.4                                | 70.6                               | --                   | --                   |
| C3 subst                   | --                                 | --                                 | --                                  | 80.6                               | --                   | --                   |
| C4 <sup>8</sup>            | 81.4                               | 81.5                               | 81.4                                | 80.5                               | --                   | --                   |
| C5 <sup>8</sup>            | 71.8                               | 72.3                               | 72.7                                | 70.6                               | --                   | --                   |
| C6 unsubst                 | 61.2                               | 60.4                               | 60.1                                | 60.8                               | --                   | --                   |
| C6 subst                   | --                                 | --                                 | --                                  | 71.2                               | --                   | --                   |
| alpha to CD-O <sup>8</sup> | 69.7, 70.4                         | 68.6                               | 66.3                                | 70.2                               | 60.9                 | 70.0                 |
| beta to CD-O <sup>8</sup>  | 177.9                              | 38.1                               | 33.4                                | 27.9                               | 30.2                 | 27.1                 |
| gamma to CD-O              | --                                 | 180.7                              | 177.4                               | 21.0                               | 19.8                 | 20.8                 |
|                            |                                    |                                    | (174.3) <sup>9</sup>                |                                    |                      |                      |
| delta to CD-O              | --                                 | --                                 | --                                  | 50.2                               | 50.0                 | 50.7                 |

<sup>1</sup> CM= Carboxymethyl; <sup>2</sup> CE=Carboxyethyl; <sup>3</sup> CAM=Carbamoylethyl; <sup>4</sup> SB=Sulfobutyl; <sup>5</sup> HOBSANa=4-hydroxybutanesulfonic acid sodium salt; <sup>6</sup> BIBSANA: di(1,1'-sulfonatobutyl)ether disodium salt (disodium 4,4'-oxydibutane-1,1'-disulfonate); <sup>7</sup> main peaks only; <sup>8</sup> shaded assignments may be altered; <sup>9</sup> protonated carboxyl group (tentative) of the partially hydrolyzed product

Table S 3: Characteristic C=O IR bands of the prepared (carbonyl)ethyl group containing CD derivatives

|                          | Compound 3<br>(CEβCD) | Compound 5<br>(CAMβCD)<br>Item 9 | Compound 5<br>(CAMβCD)<br>Item 10 |
|--------------------------|-----------------------|----------------------------------|-----------------------------------|
| C=O as COO <sup>-</sup>  | 1570                  | 1559                             | --                                |
| C=O as COOH              | 1726                  | --                               | --                                |
| C=O as CONH <sub>2</sub> | --                    | 1667                             | 1664                              |

Table S 4: R<sub>F</sub>-values of the prepared compounds after twice run of the same plate in the same solvent mixture at 7 cm distance in 100 μg

|                     |           |                           |           |      |                                                  |
|---------------------|-----------|---------------------------|-----------|------|--------------------------------------------------|
| βCD                 | 0.53-0.54 |                           |           |      |                                                  |
| CMβCD <sup>1</sup>  | 0.05-0.48 | strip with multiple spots | 0.45-0.48 | mono |                                                  |
| CEβCD <sup>2</sup>  | 0.15-0.47 | strip with multiple spots | 0.44-0.47 | mono |                                                  |
| CAMβCD <sup>3</sup> | 0.54-0.65 | strip with multiple spots | 0.55-0.57 | mono | 0.21-0.54 light brown strip no distinctive spots |
| SBβCD <sup>4</sup>  | 0.05-0.43 | strip with multiple spots | 0.40-0.43 | mono |                                                  |

<sup>1</sup> CM= Carboxymethyl; <sup>2</sup> CE=Carboxyethyl; <sup>3</sup> CAM=Carbamoylethyl; <sup>4</sup> SB=Sulfobutyl

## References

- [1] Strohalm, M.; Kavan, D.; Novák, P.; Volný, M. & Havlíček, V., mMass 3: A Cross-Platform Software Environment for Precise Analysis of Mass Spectrometric Data. *Analytical Chemistry*, **2010**, *82*, 4648-4651
- [2] mMass v5.5, An Open Source Mass Spectrometry Tool, [www.mmass.org](http://www.mmass.org)
